# Supplementary material for: Metabolite Profiling and Dipeptidyl Peptidase IV Inhibitory Activity of Coreopsis Cultivars in Different Mutations
Source: MDPI journal article supplement (doi:10.3390/plants10081661), 2021-08-12

# Supporting Information

## Metabolite Profiling and Dipeptidyl Peptidase IV Inhibitory Activity of Coreopsis Cultivars in Different Mutation

Bo-Ram Kim <sup>1,2,†</sup>, Sunil Babu Paudel <sup>3,†</sup>, Ah-Reum Han <sup>1,†</sup>, Ji-Su Park <sup>1</sup>, Yun-Seo Kil <sup>3</sup>, Hyukjae Choi <sup>3,4</sup>, Yeo Gyeong Jeon <sup>5</sup>, Kong Young Park <sup>5</sup>, Si-Yong Kang <sup>6</sup>, Chang Hyun Jin <sup>1</sup>, Jin-Baek Kim <sup>1</sup>, and Joo-Won Nam <sup>3,\*</sup>

- 1 Advanced Radiation Technology Institute, Korea Atomic Energy Research Institute (KAERI), Jeongeup-si, Jeollabuk-do 56212, Republic of Korea
- 2 Natural Product Research Division, Honam National Institute of Biological Resources, Mokpo-si, Jeollanam-do 58762, Republic of Korea
- 3 College of Pharmacy, Yeungnam University, Gyeongsan-si, Gyeongsangbuk-do 38541, Republic of Korea
- 4 Research Institute of Cell Culture, Yeungnam University, Gyeongsan, Gyeongbuk 38541, Republic of Korea
- 5 Uriseed Group, Icheon-si, Gyeonggi-do 17408, Republic of Korea
- 6 Department of Horticulture, College of Industrial Sciences, Kongju National University, Yesan-gun, Chungcheongnam-do 32439, Republic of Korea

\* Correspondence: jwnam@yu.ac.kr (J.-W.N.); Tel. +53-810-2818 (J.-W.N.)

† These authors contributed equally to this work.

# CONTENS

- Figure S1.** Representative UPLC-QToF-MS chromatograms of the 70% methanol extracts of the original cultivars at low CE scan (6 eV) for precursor (up) and high CE scan (20-50 eV) for fragment ions (down). **(a)** ‘Heaven’s gate’ (No. 1), **(b)** ‘Citrine’ (No. 13), **(c)** ‘Pumpkin Pie’ (No. 19), **(d)** ‘Route 66’ (No. 25), and **(e)** ‘Moonbeam’ (No. 31).
- Figure S2.** ESI-QToF-MS spectrum of taxifolin-7-O-glucoside (peak 1)
- Figure S3.** ESI-QToF-MS spectrum of chlorogenic acid (peak 2)
- Figure S4.** ESI-QToF-MS spectrum of taxifolin-3-O-glucoside (peak 3)
- Figure S5.** ESI-QToF-MS spectrum of vanillic acid-4-glucoside (peak 4)
- Figure S6.** ESI-QToF-MS spectrum of flavomarein (peak 5)
- Figure S7.** ESI-QToF-MS spectrum of isookanin-7-O-rutinoside (peak 6)
- Figure S8.** ESI-QToF-MS spectrum of luteolin-7-O-sophoroside (peak 7)
- Figure S9.** ESI-QToF-MS spectrum of butin-7-O-glucoside (peak 8)
- Figure S10.** ESI-QToF-MS spectrum of 8-methoxyeriodictyol-7-O-glucoside (peak 9)
- Figure S11.** ESI-QToF-MS spectrum of coreolanceoline B (peak 10)
- Figure S12.** ESI-QToF-MS spectrum of lanceolin (peak 11)
- Figure S13.** ESI-QToF-MS spectrum of naringenin-7-O-glucoside (peak 12)
- Figure S14.** ESI-QToF-MS spectrum of okanin-3,4'-O-diglucoside (peak 13)
- Figure S15.** ESI-QToF-MS spectrum of 4',7,8-trihydroxyflavone-O-diglucoside (peak 14)
- Figure S16.** ESI-QToF-MS spectrum of fisetin-3,7-O-diglucoside (peak 15)
- Figure S17.** ESI-QToF-MS spectrum of isookanin (peak 16)
- Figure S18.** ESI-QToF-MS spectrum of taxifolin (peak 17)
- Figure S19.** ESI-QToF-MS spectrum of 4',5,7,8-tetrahydroxyflavanone-7-O-(6-O-arabinosyl-glucoside) (peak 18)
- Figure S20.** ESI-QToF-MS spectrum of sulfuretin-6-O-glucoside (peak 19)
- Figure S21.** ESI-QToF-MS spectrum of quercetin-7-O-glucoside (peak 20)
- Figure S22.** ESI-QToF-MS spectrum of maritimein (peak 21)
- Figure S23.** ESI-QToF-MS spectrum of luteolin-7-O-glucoside (peak 22)
- Figure S24.** ESI-QToF-MS spectrum of marein (peak 23 )
- Figure S25.** ESI-QToF-MS spectrum of taxifolin 3',7-dimethyl ether 3-O-glucoside (peak 24)
- Figure S26.** ESI-QToF-MS spectrum of 3,3',4'-trihydroxy-7-methoxyflavone 3-O-glucoside (peak 25)
- Figure S27.** ESI-QToF-MS spectrum of quercetagenin-7-O-(6''-caffeoylglucoside) (peak 26)
- Figure S28.** ESI-QToF-MS spectrum of 3,5-dicaffeoylquinic acid (peak 27)
- Figure S29.** ESI-QToF-MS spectrum of sulfuretin (peak 28)
- Figure S30.** ESI-QToF-MS spectrum of luteolin-6-O-rhamnoside (peak 29)
- Figure S31.** ESI-QToF-MS spectrum of coreopsin (peak 30)

- Figure S32.** ESI-QToF-MS spectrum of 4,5-dicaffeoylquinic acid (peak 31)
- Figure S33.** ESI-QToF-MS spectrum of okanin (peak 32)
- Figure S34.** ESI-QToF-MS spectrum of eriodictyol chalcone-O-diglucoside (peak 33)
- Figure S35.** ESI-QToF-MS spectrum of eriodictyol chalcone (peak 34)
- Figure S36.** ESI-QToF-MS spectrum of kaempferide (peak 35)
- Figure S37.** ESI-QToF-MS spectrum of luteolin (peak 36)
- Figure S38.** ESI-QToF-MS spectrum of 4-methoxylanceoletin-4'-O-glucoside (peak 37)
- Figure S39.** ESI-QToF-MS spectrum of butein (peak 38)
- Figure S40.** ESI-QToF-MS spectrum of apigenin (peak 39)
- Figure S41.** ESI-QToF-MS spectrum of unknown (peak 40)
- Figure S42.** ESI-QToF-MS spectrum of lobetyolinin (peak 41)
- Figure S43.** Validation plot of the OPLS-DA obtained from 200 permutation test.

**Figure S1.** Representative UPLC-QToF MS chromatograms of the 70% methanol extracts of the original cultivars at low CE scan (6 eV) for precursor (up) and high CE scan (20-50 eV) for fragment ions (down). **(a)** ‘Heaven’s gate’ (No. 1), **(b)** ‘Citrine’ (No. 13), **(c)** ‘Pumpkin Pie’ (No. 19), **(d)** ‘Route 66’ (No. 25), and **(e)** ‘Moonbeam’ (No. 31).

**(a)**

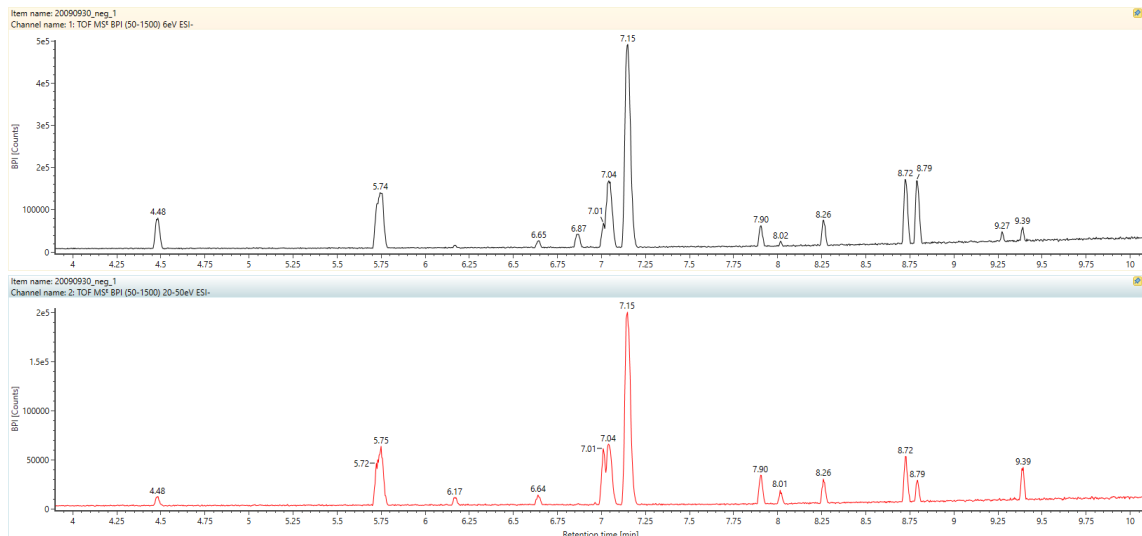

**(b)**

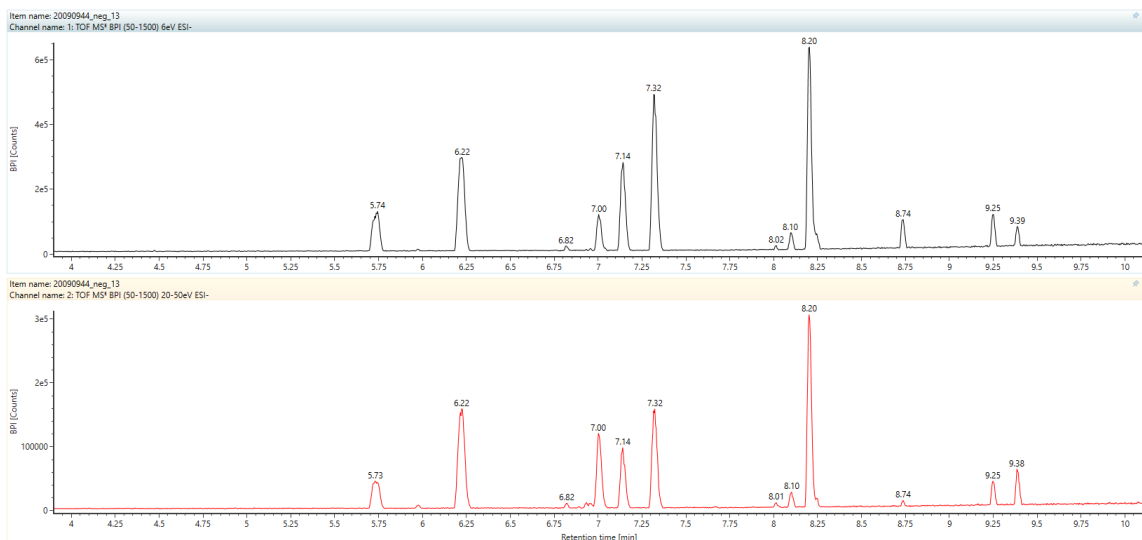

(c)

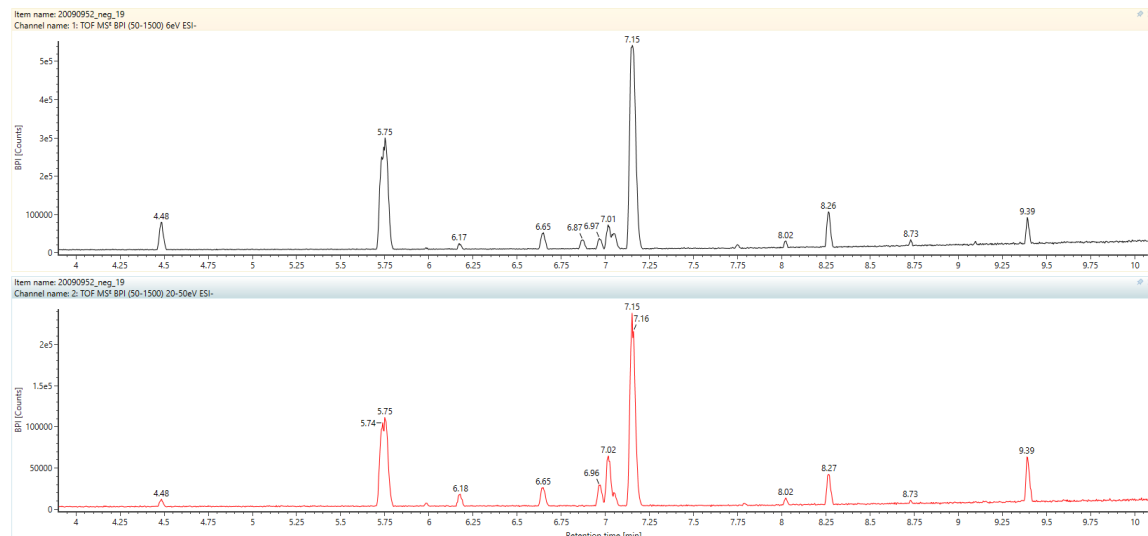

(d)

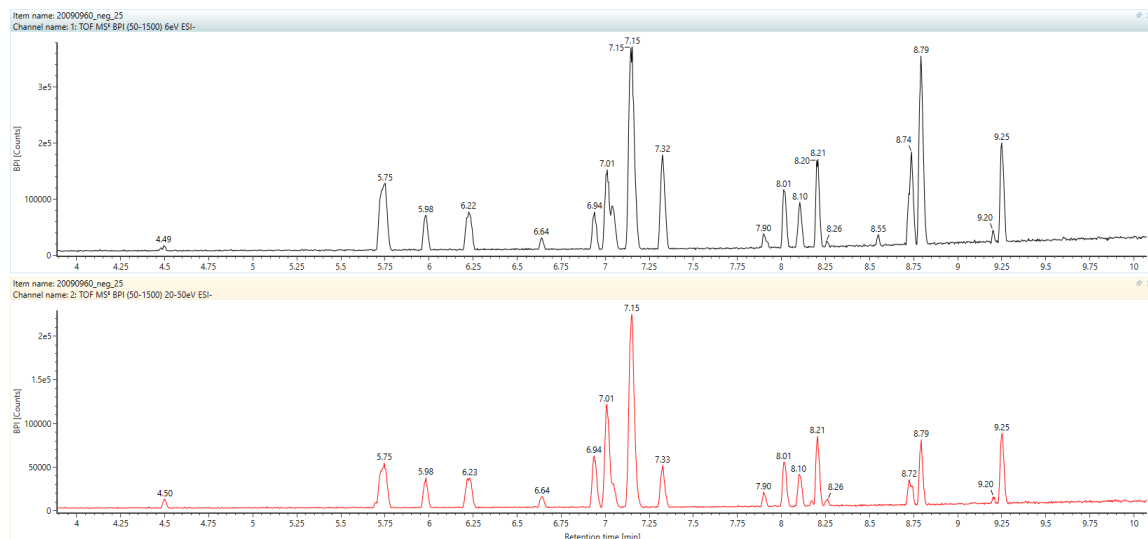

(e)

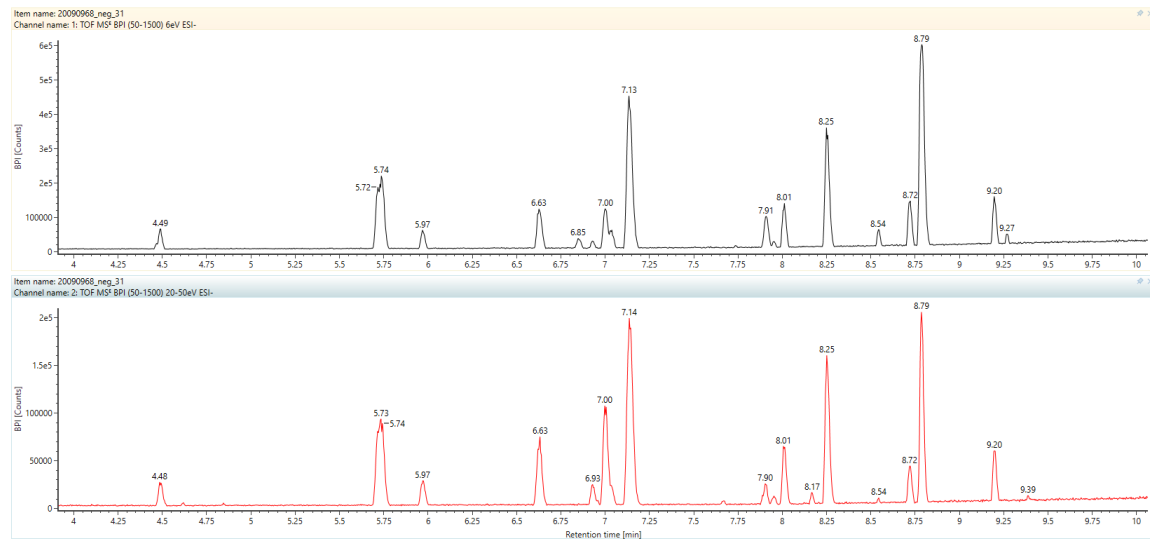

**Figure S2.** ESI-QToF-MS spectrum of taxifolin-7-O-glucoside (peak 1)

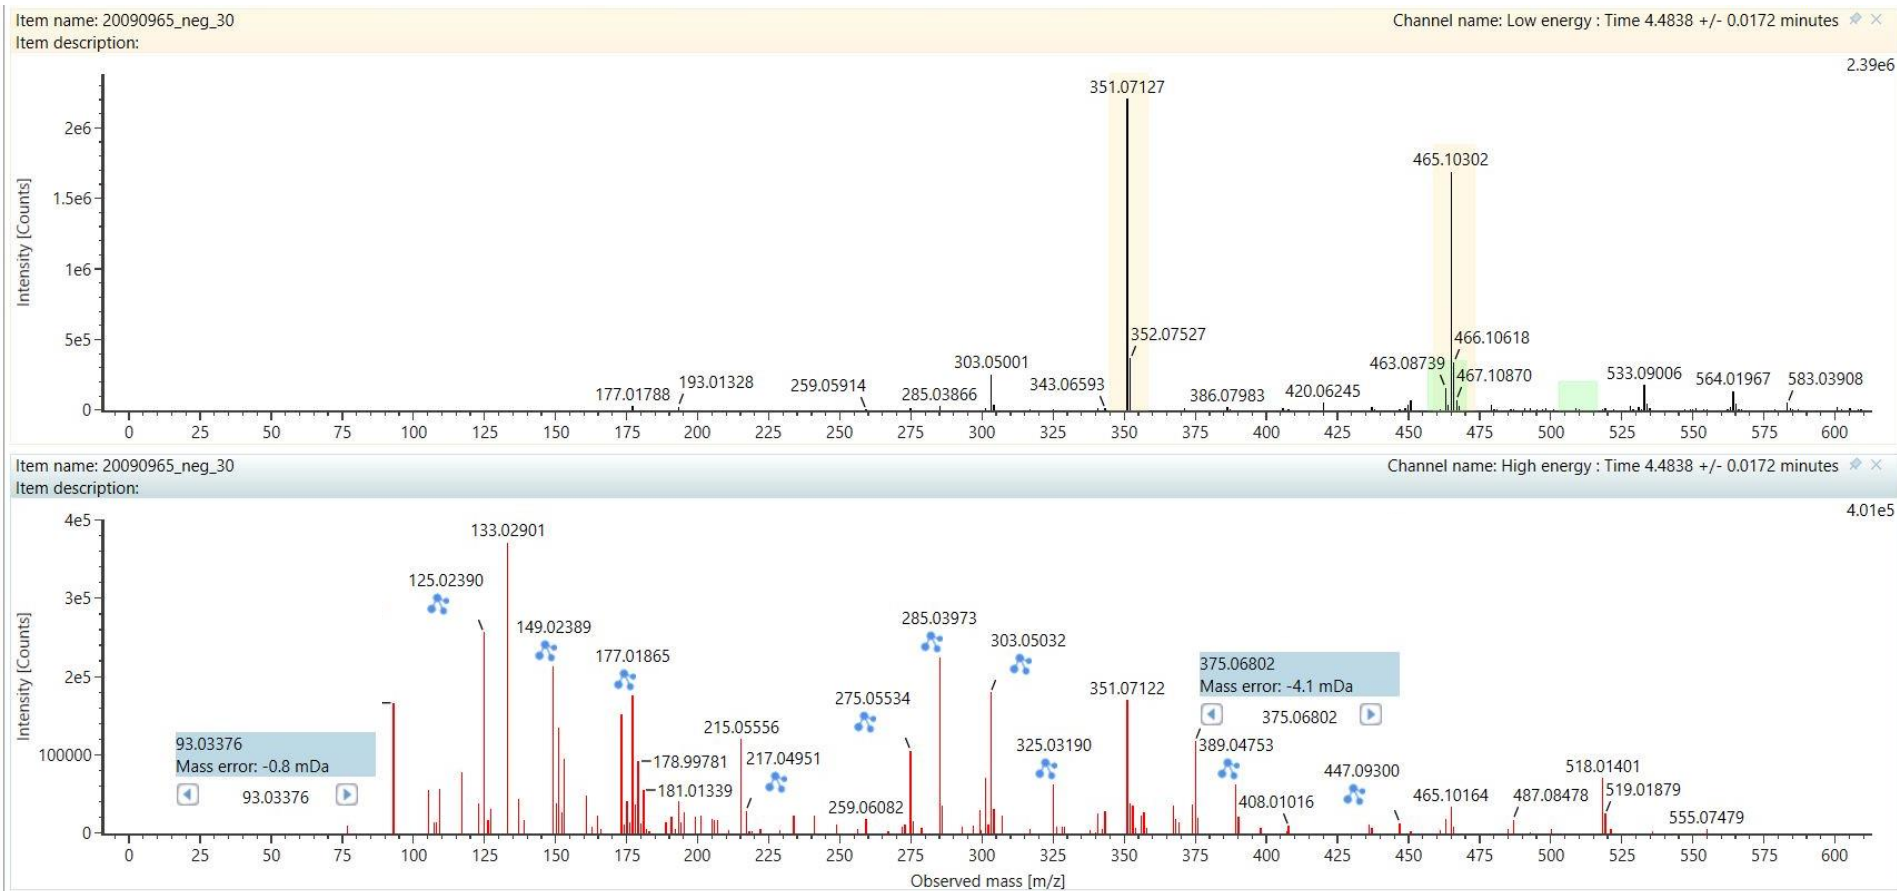

**Figure S3.** ESI-QToF-MS spectrum of chlorogenic acid (peak 2)

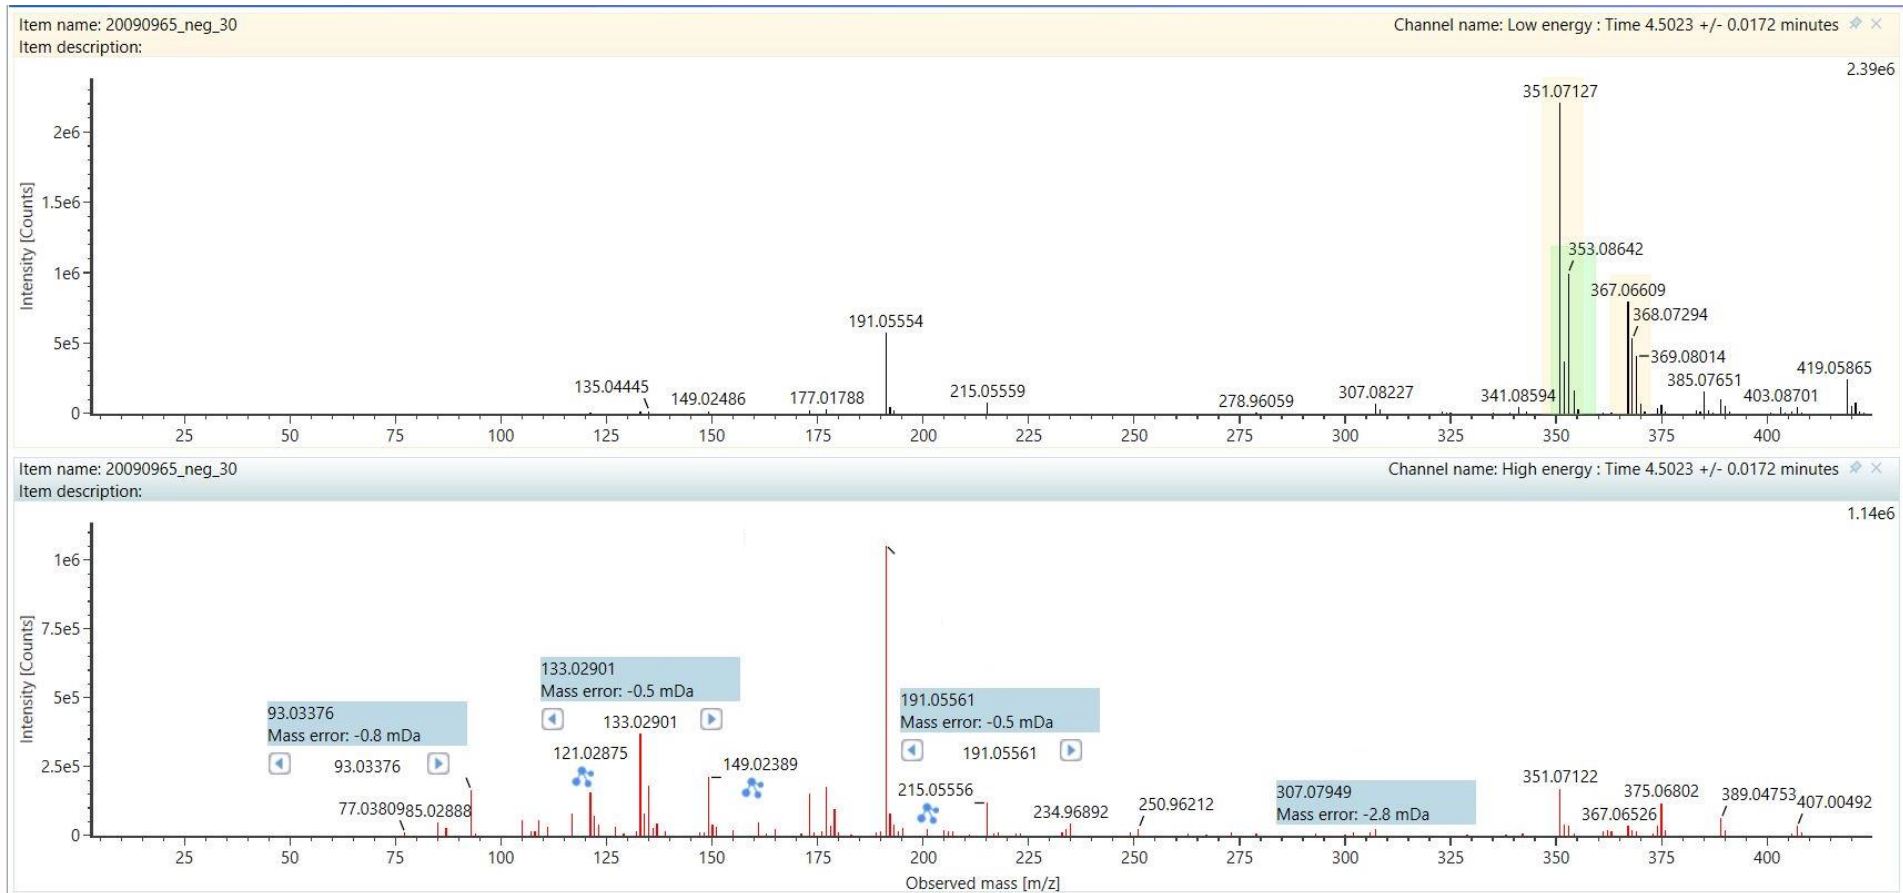



**Figure S4.** ESI-QToF-MS spectrum of taxifolin-3-O-glucoside (peak 3)

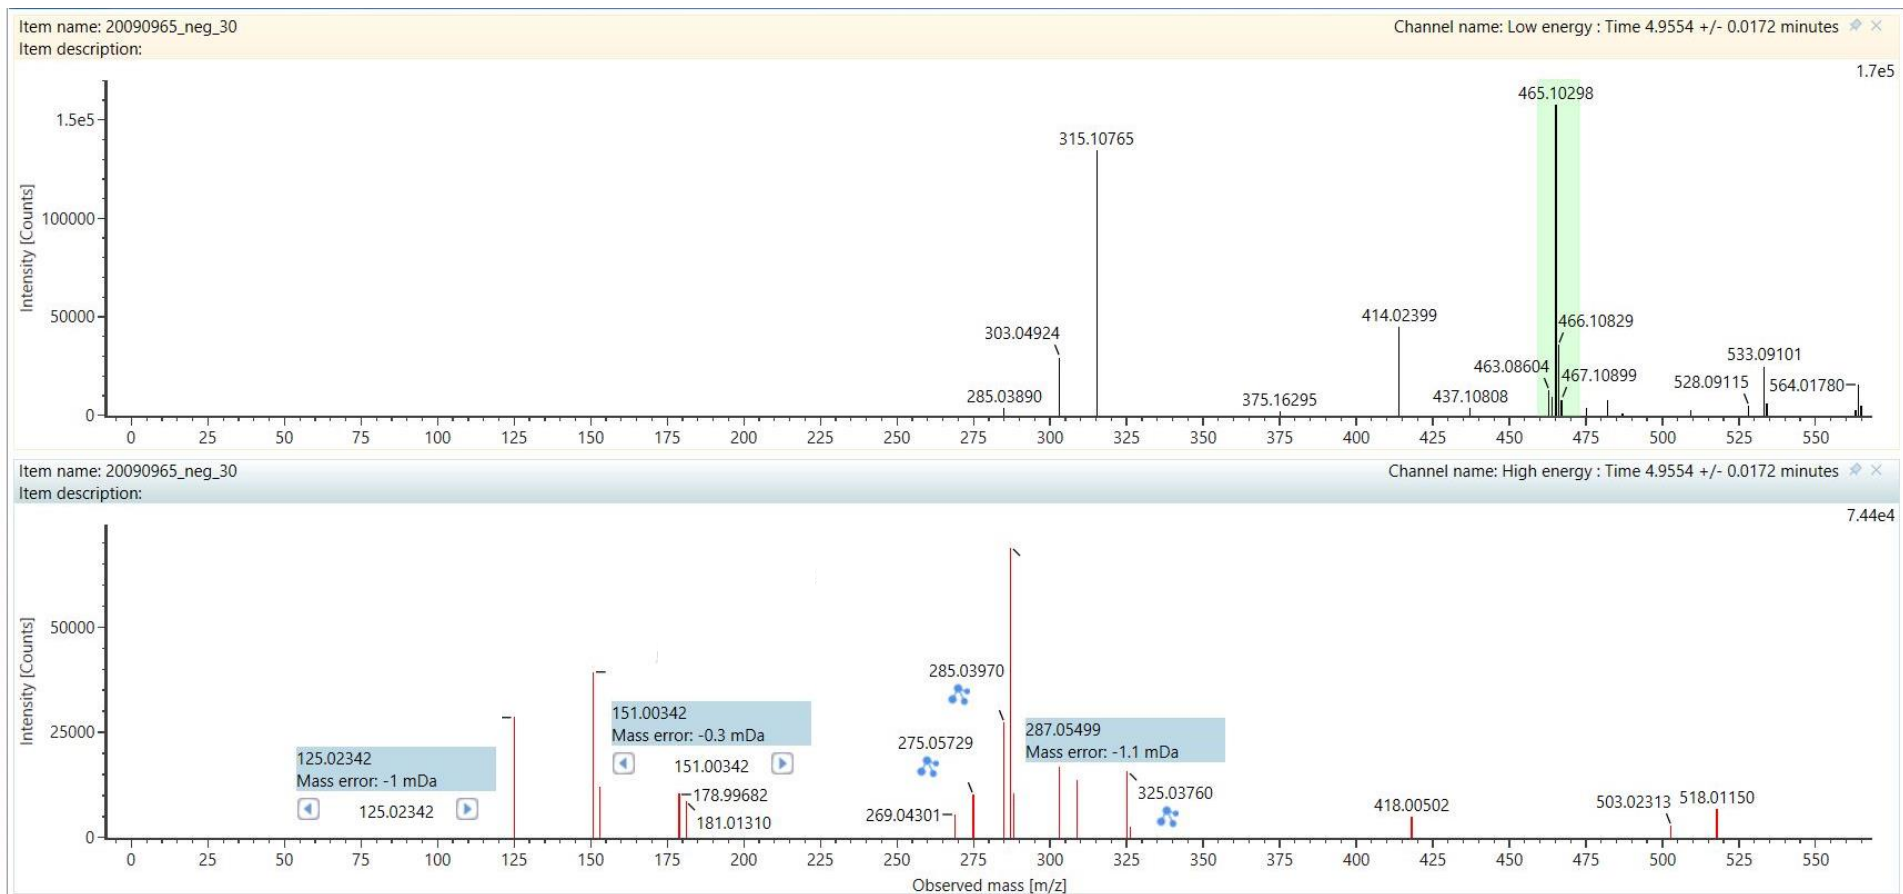

**Figure S5.** ESI-QToF-MS spectrum of vanillic acid-4-glucoside (peak 4)

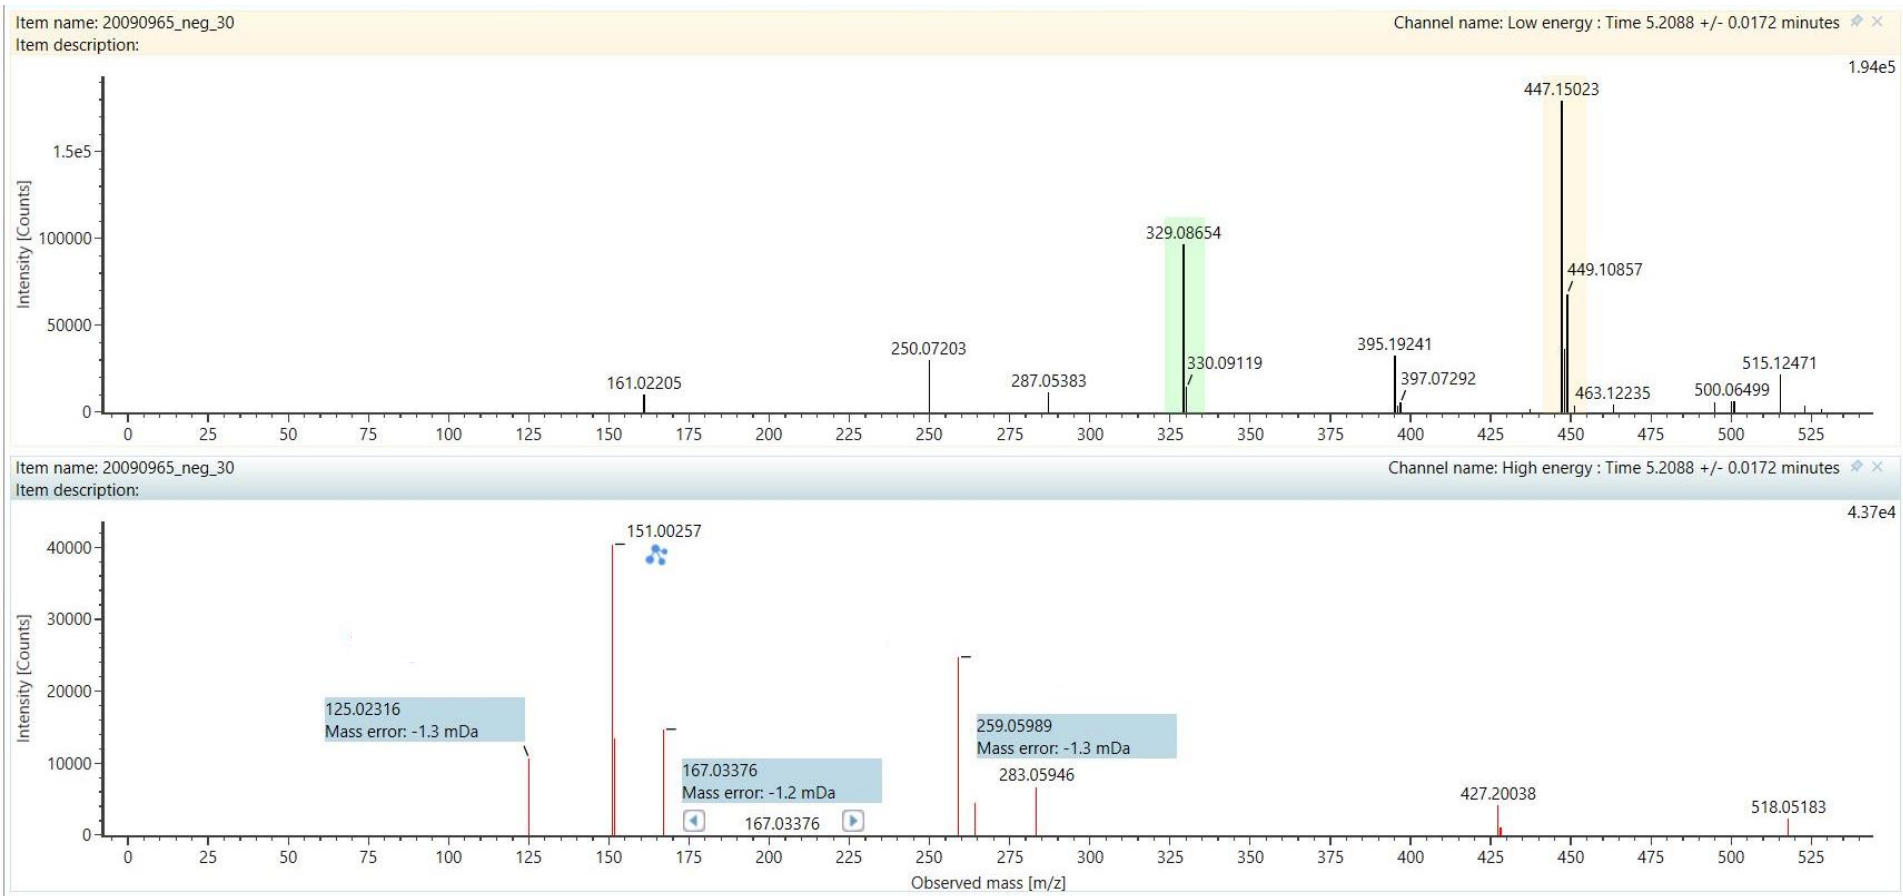

**Figure S6.** ESI-QToF-MS spectrum of flavomarein (peak 5)

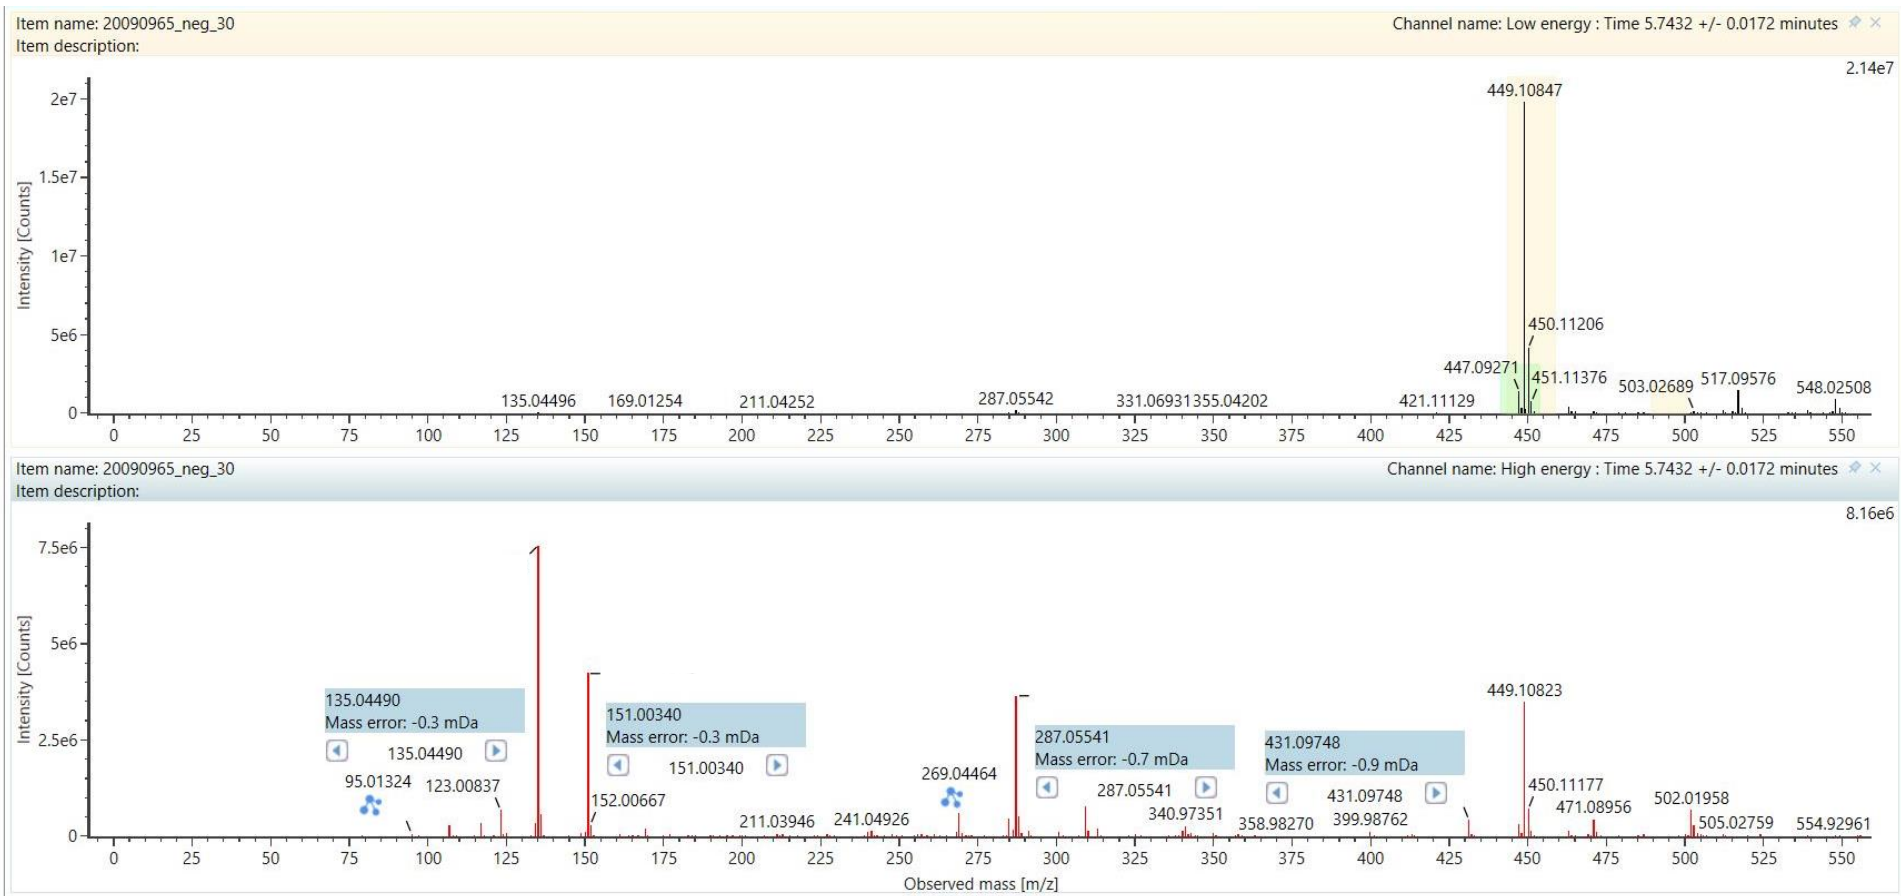

**Figure S7.** ESI-QToF-MS spectrum of isookanin-7-O-rutinoside (peak 6)

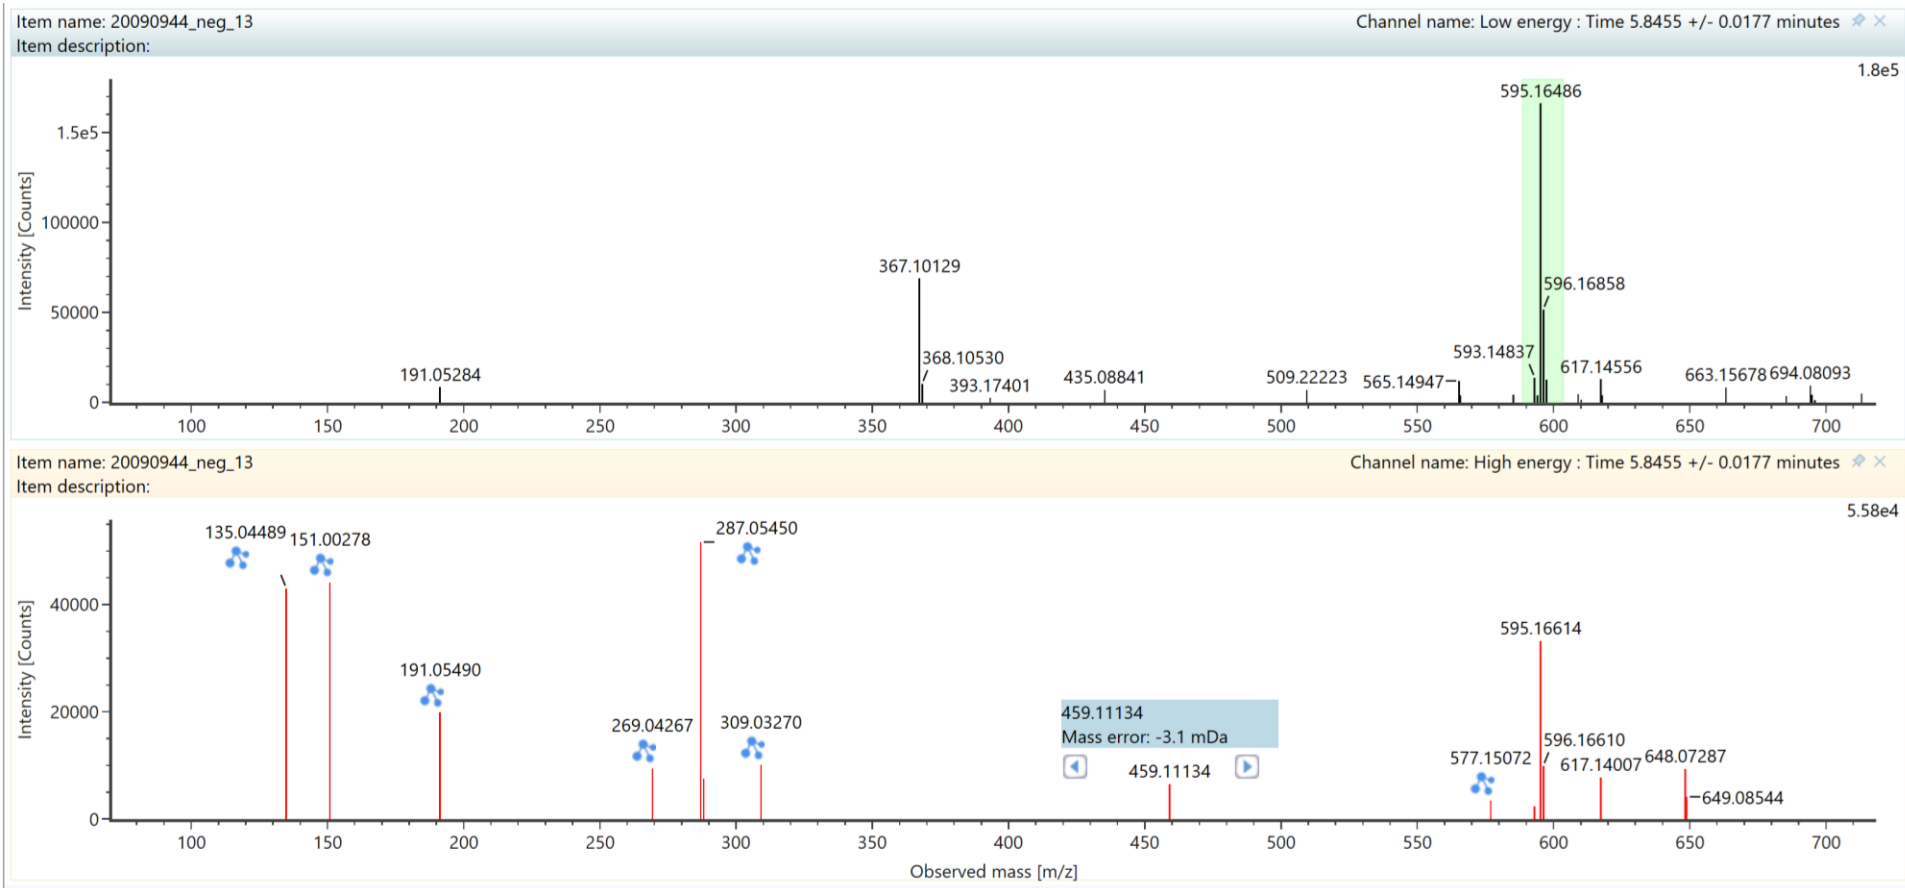

**Figure S8.** ESI-QToF-MS spectrum of luteolin-7-O-sophoroside (peak 7)

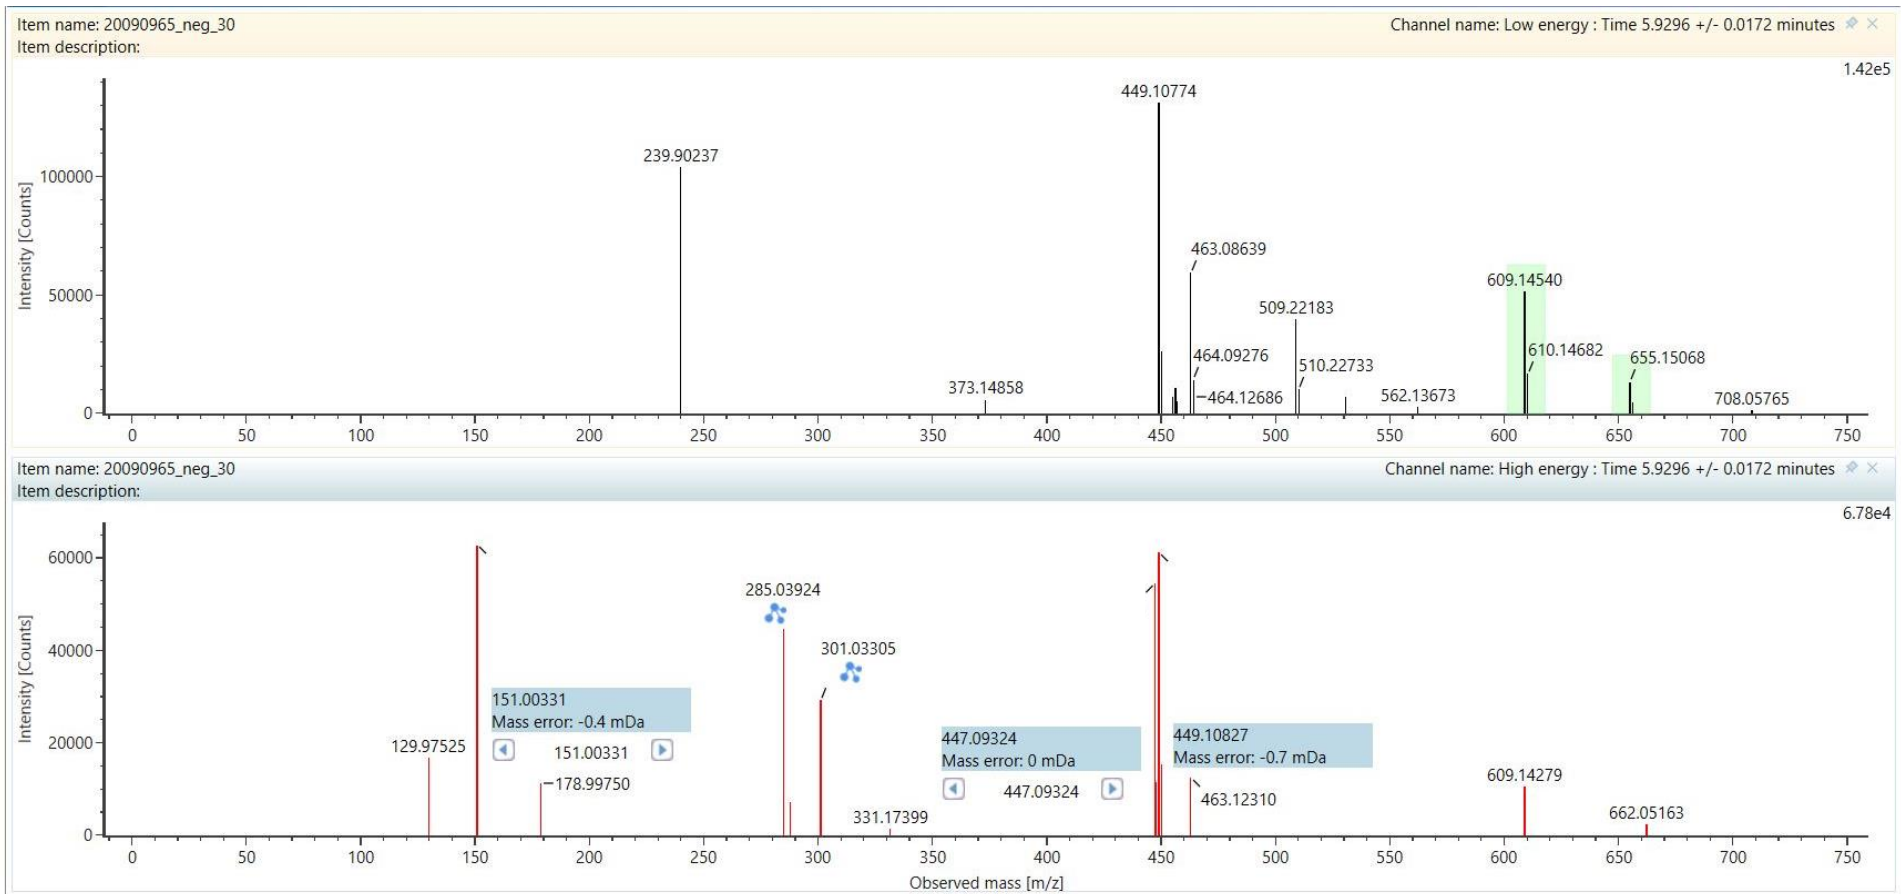

**Figure S9.** ESI-QToF-MS spectrum of butin-7-O-glucoside (peak 8)

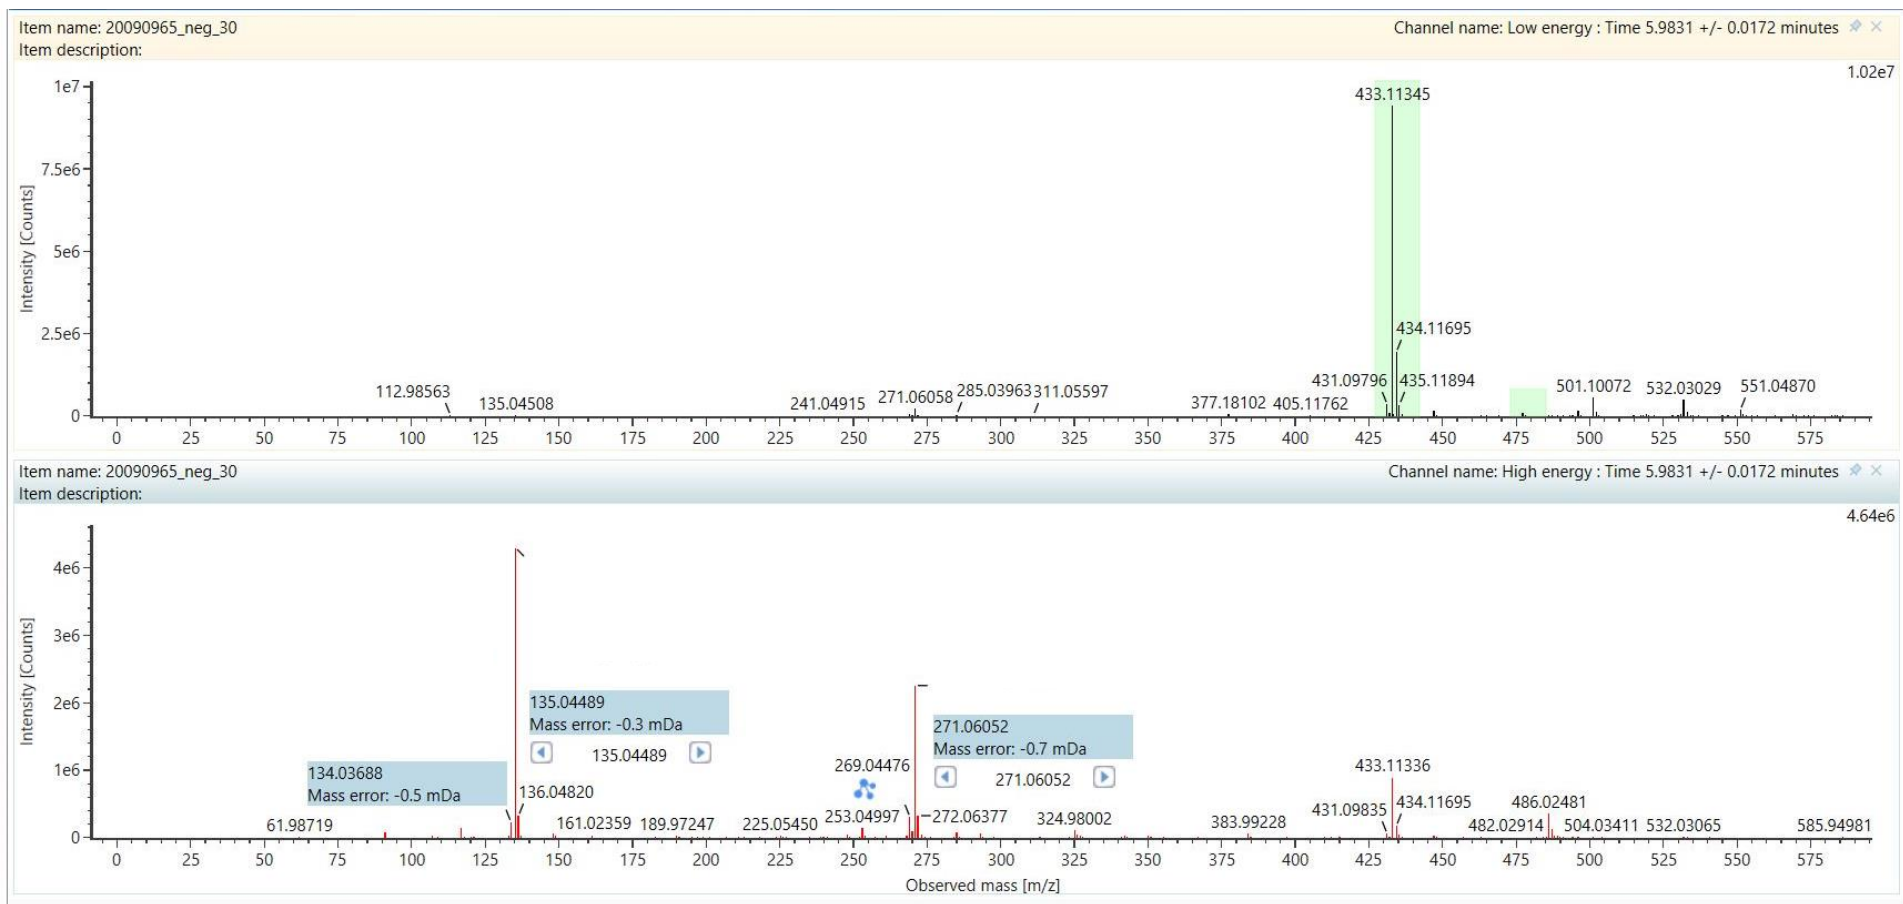

**Figure S10.** ESI-QToF-MS spectrum of 8-methoxyperiodictyol-7-O-glucoside (peak 9)

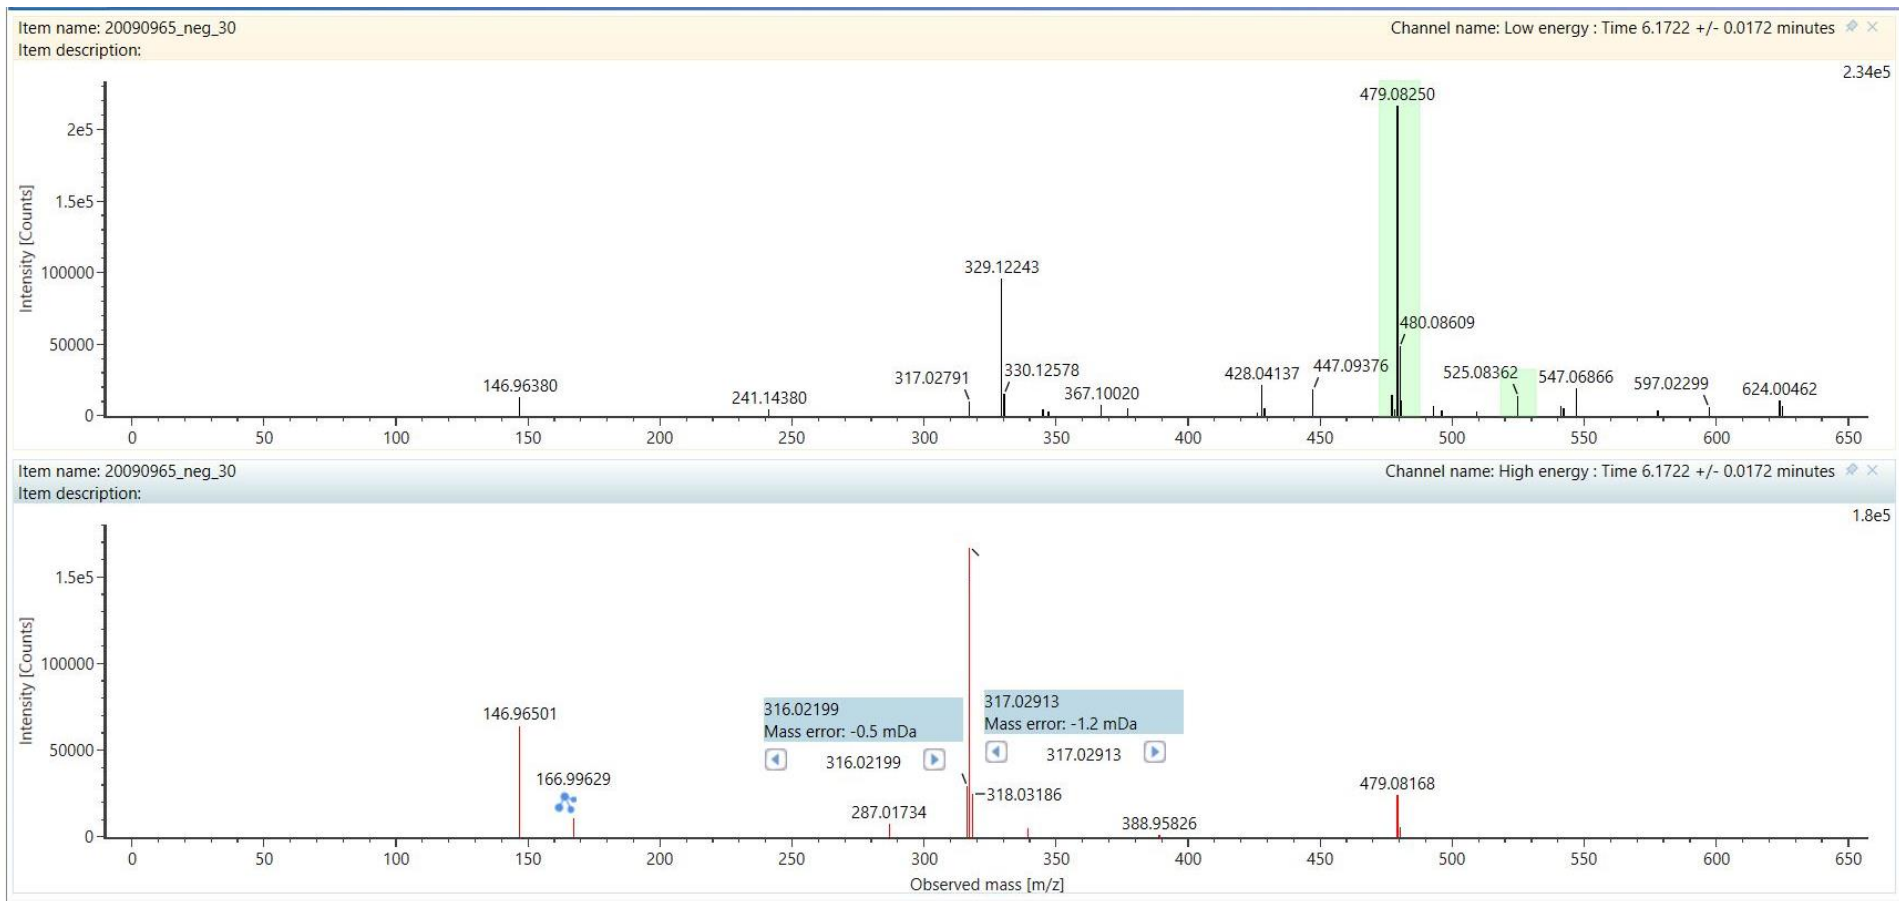

**Figure S11.** ESI-QToF-MS spectrum of coreolanceoline B (peak 10)

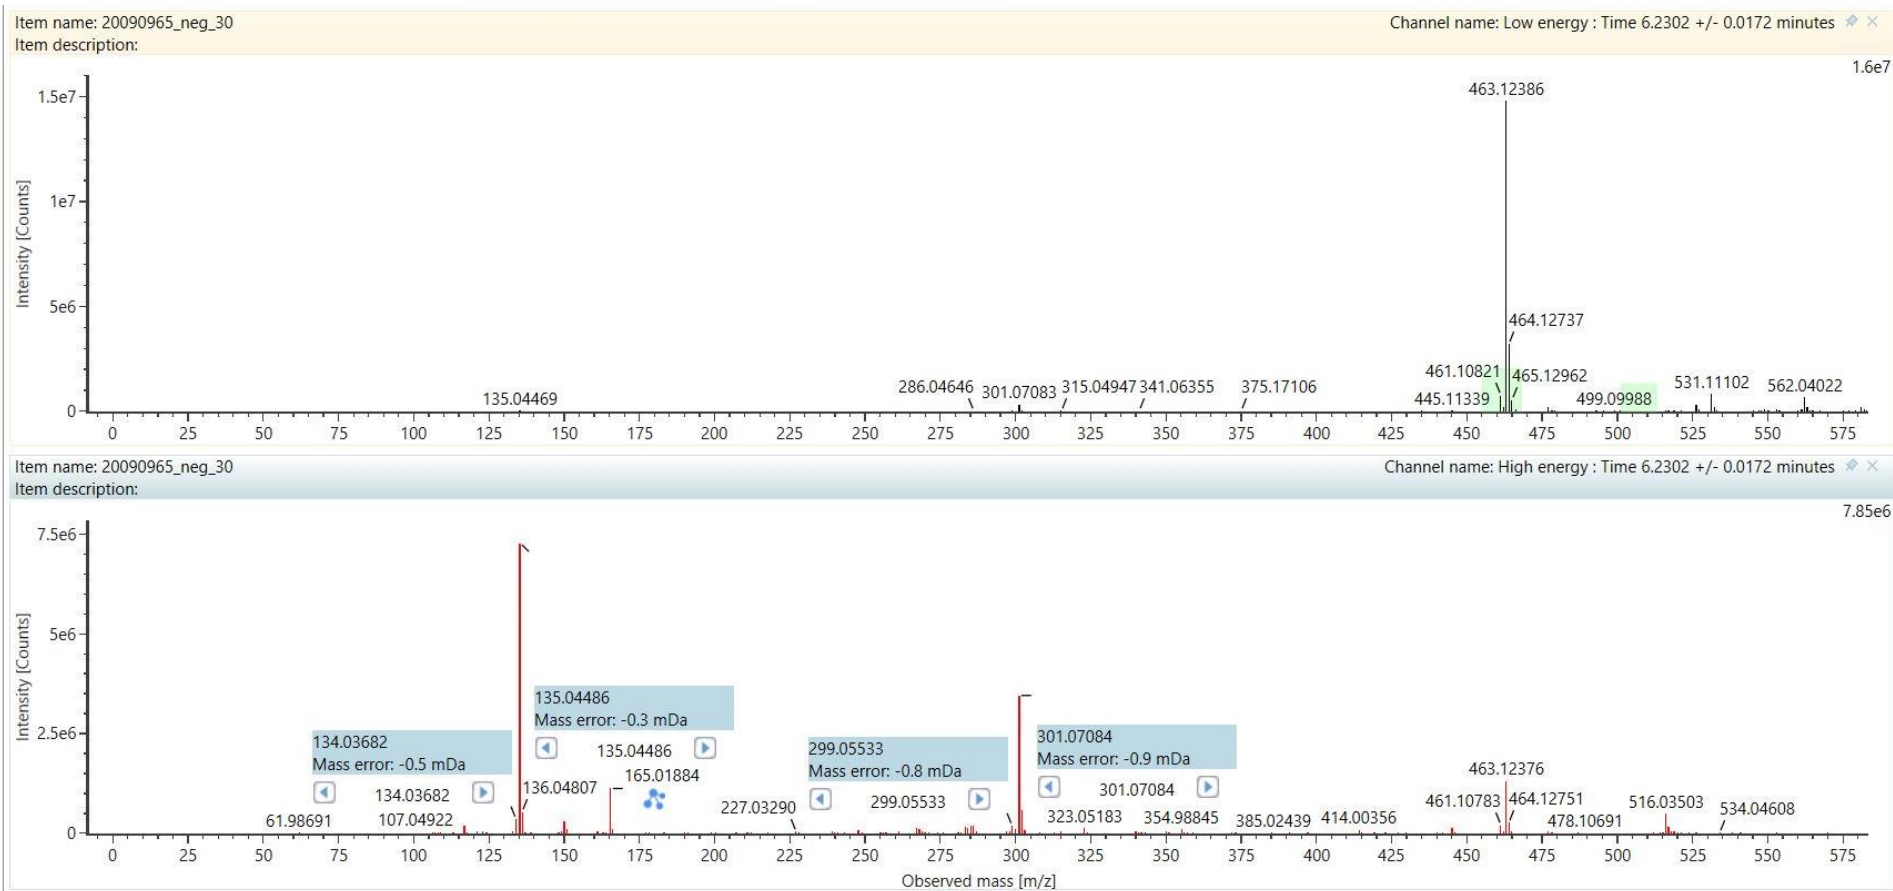



**Figure S12.** ESI-QToF-MS spectrum of lanceolin (peak 11)

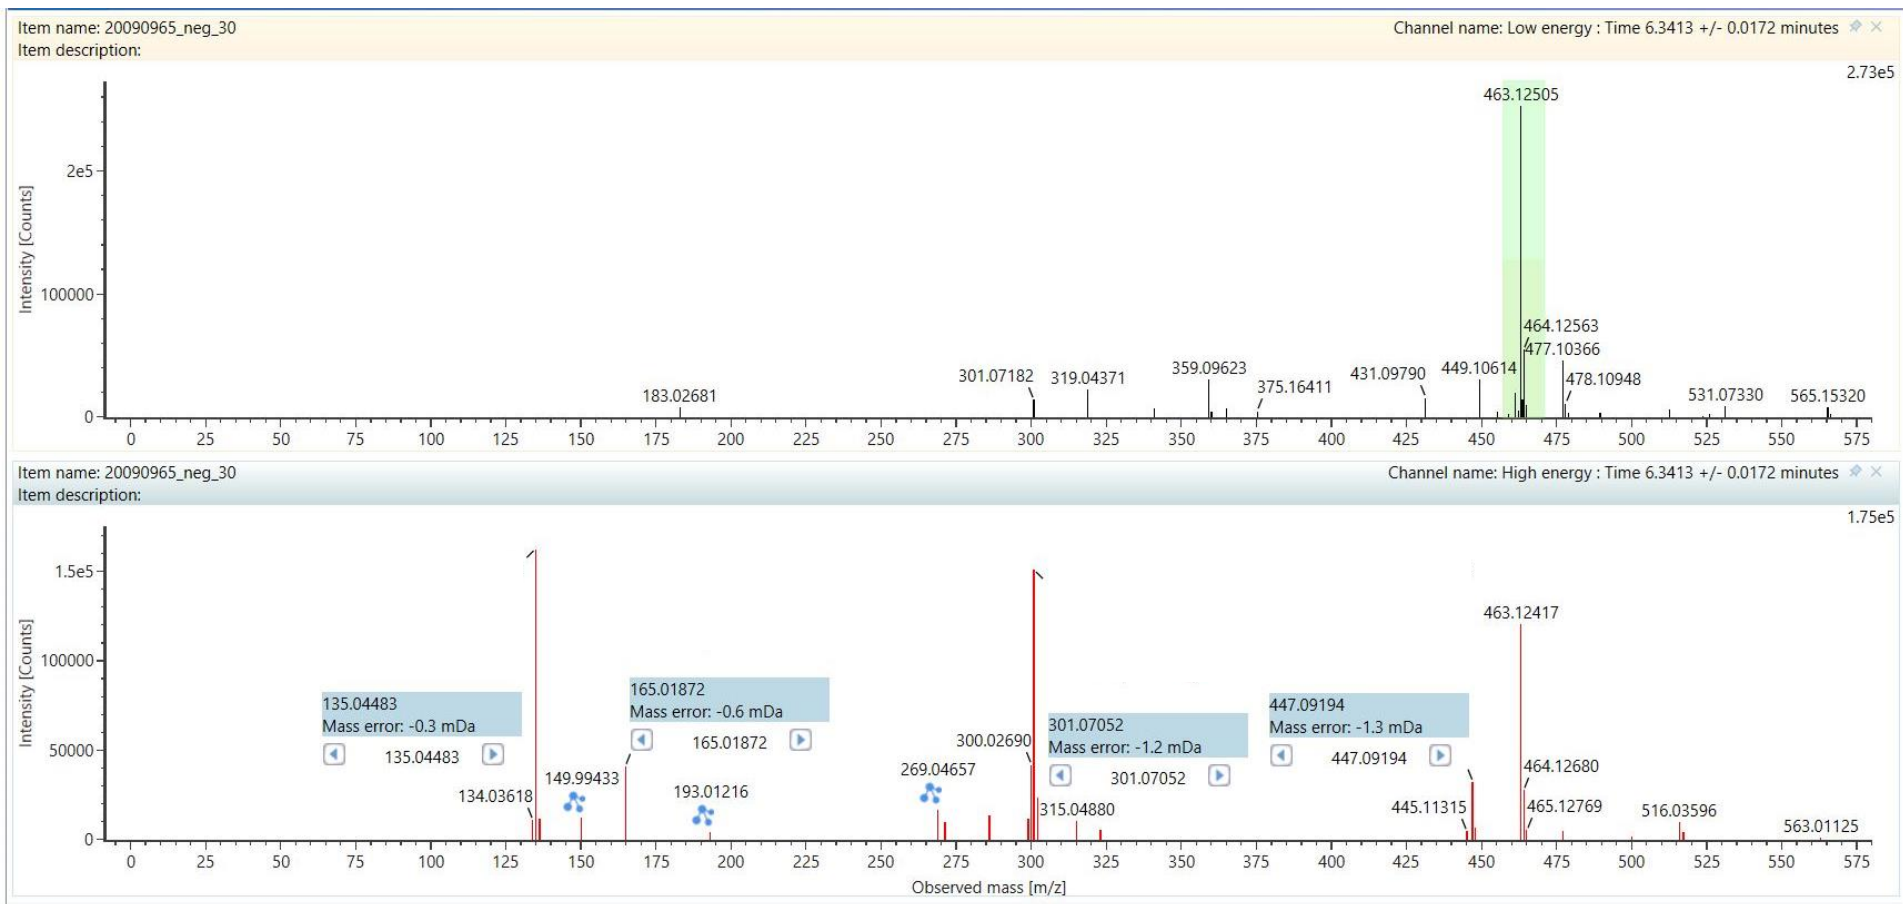

**Figure S13.** ESI-QToF-MS spectrum of naringenin-7-O-glucoside (peak 12)

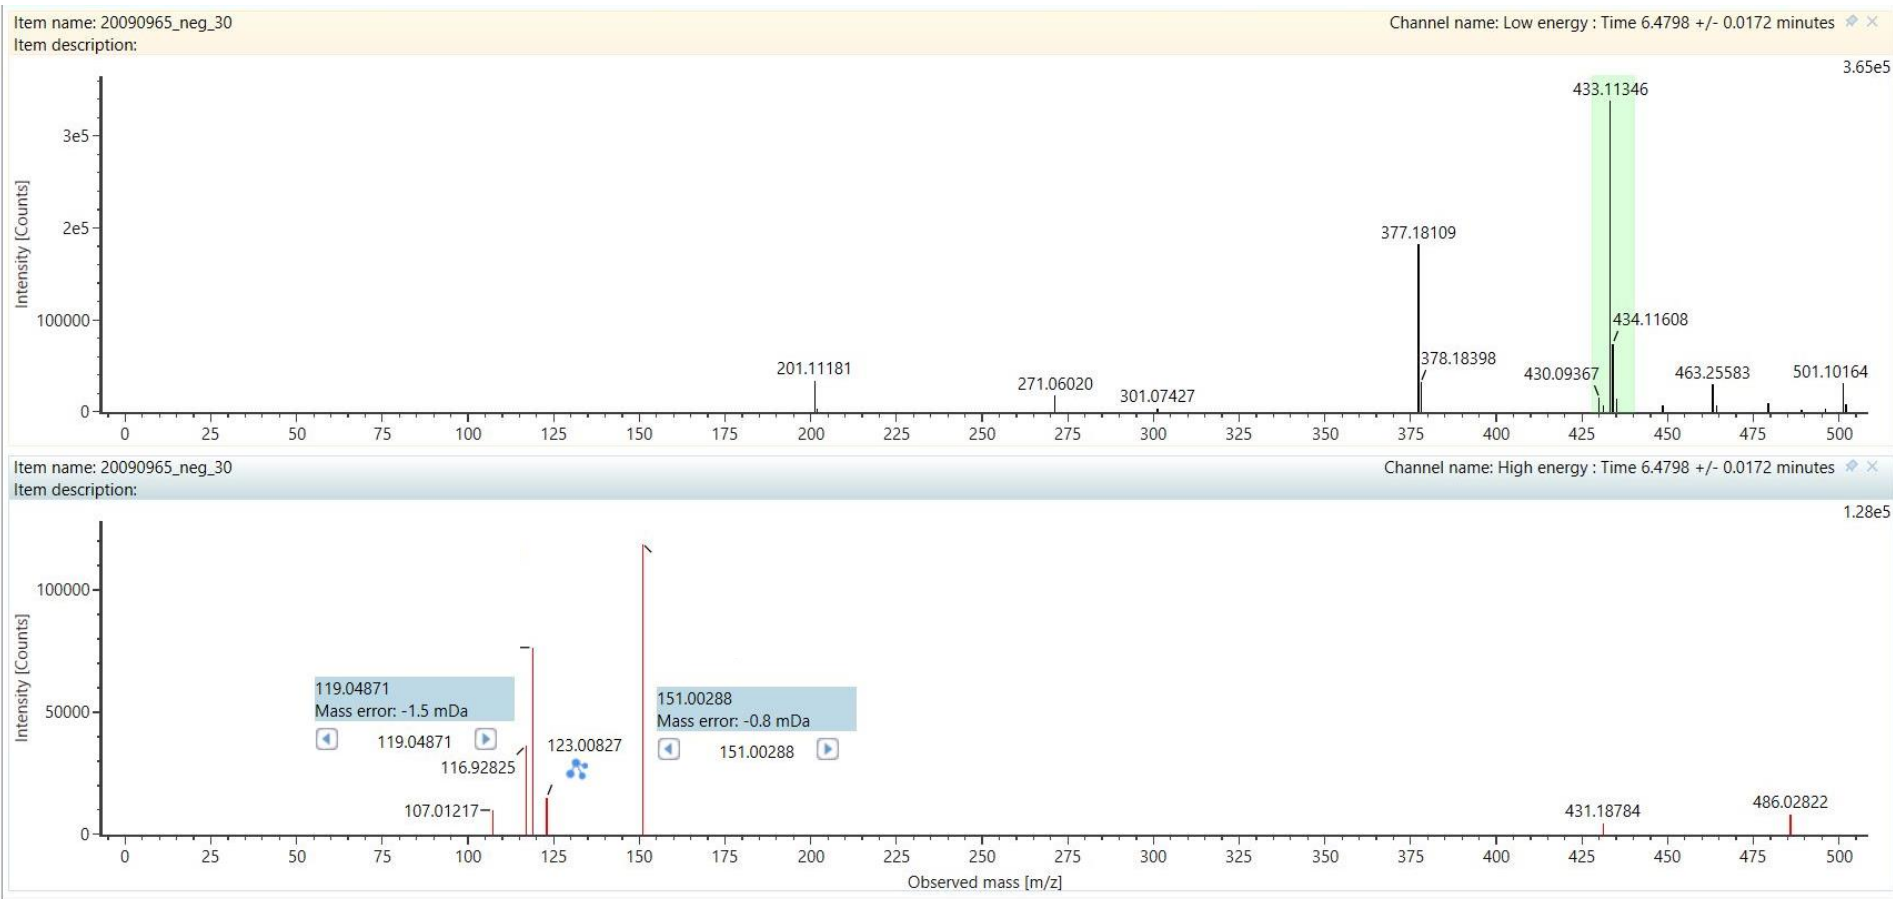

**Figure S14.** ESI-QToF-MS spectrum of okanin-4,4'-O-diglucoside (peak 13)

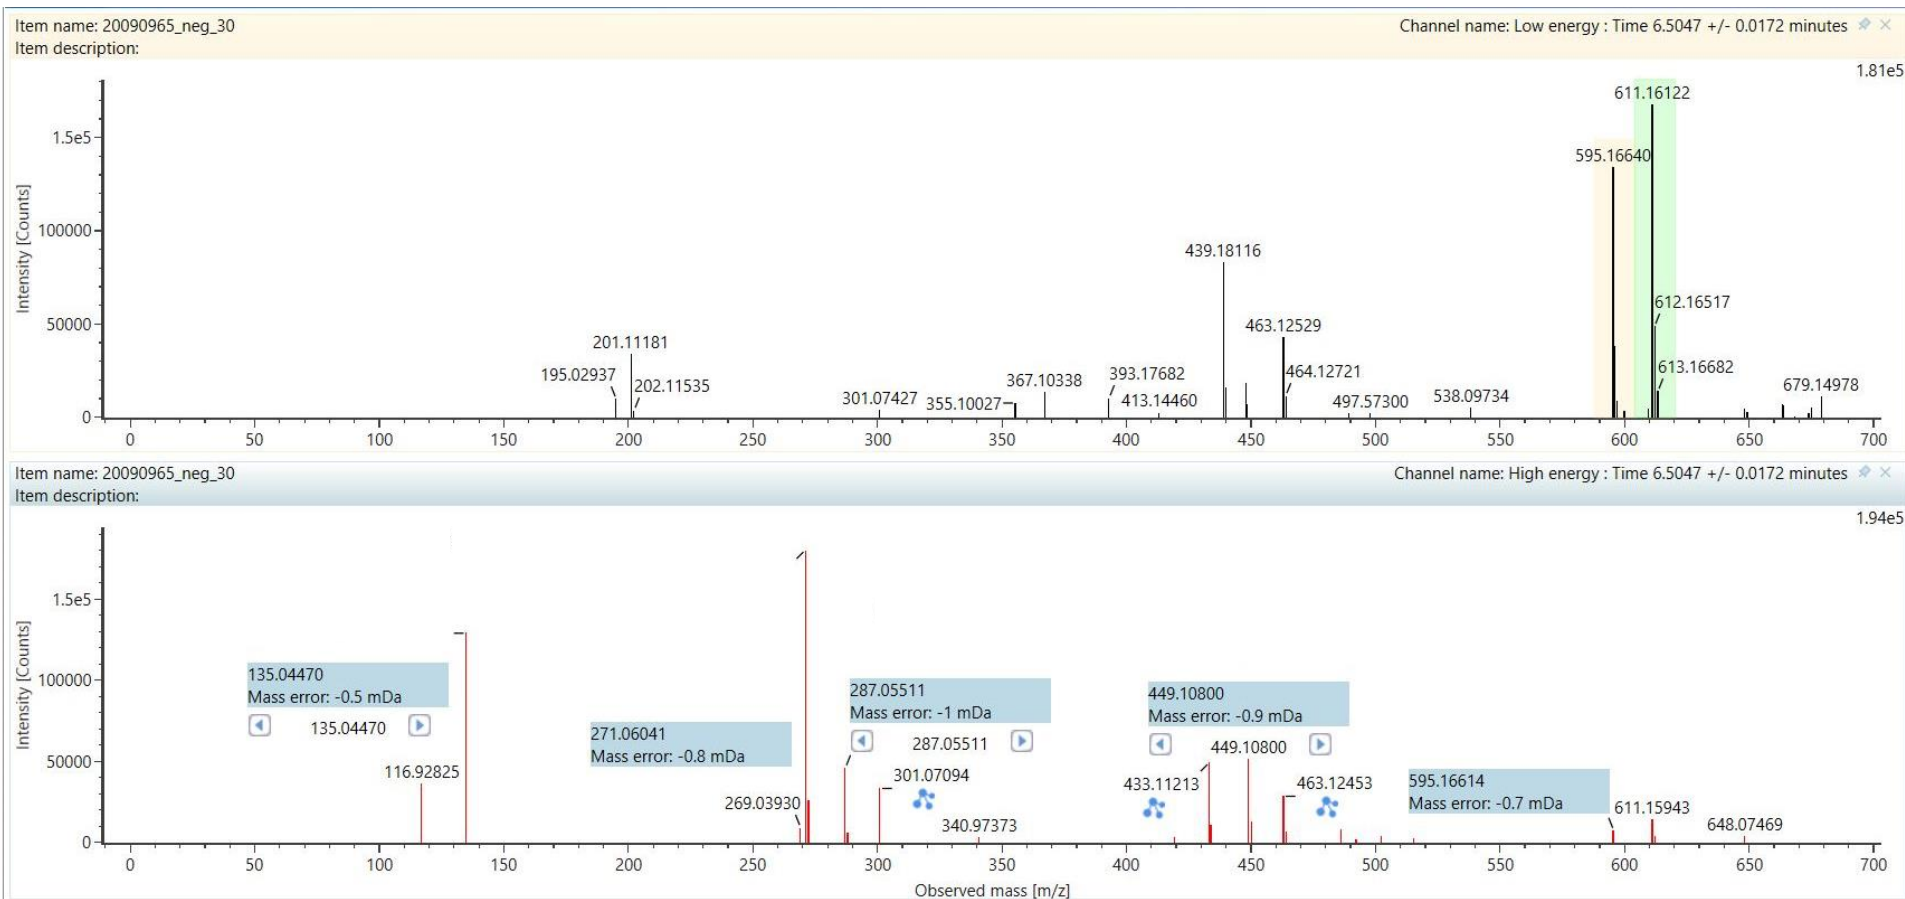

**Figure S15.** ESI-QToF-MS spectrum of 4',7,8-trihydroxyflavone-O-diglucoside (peak 14)

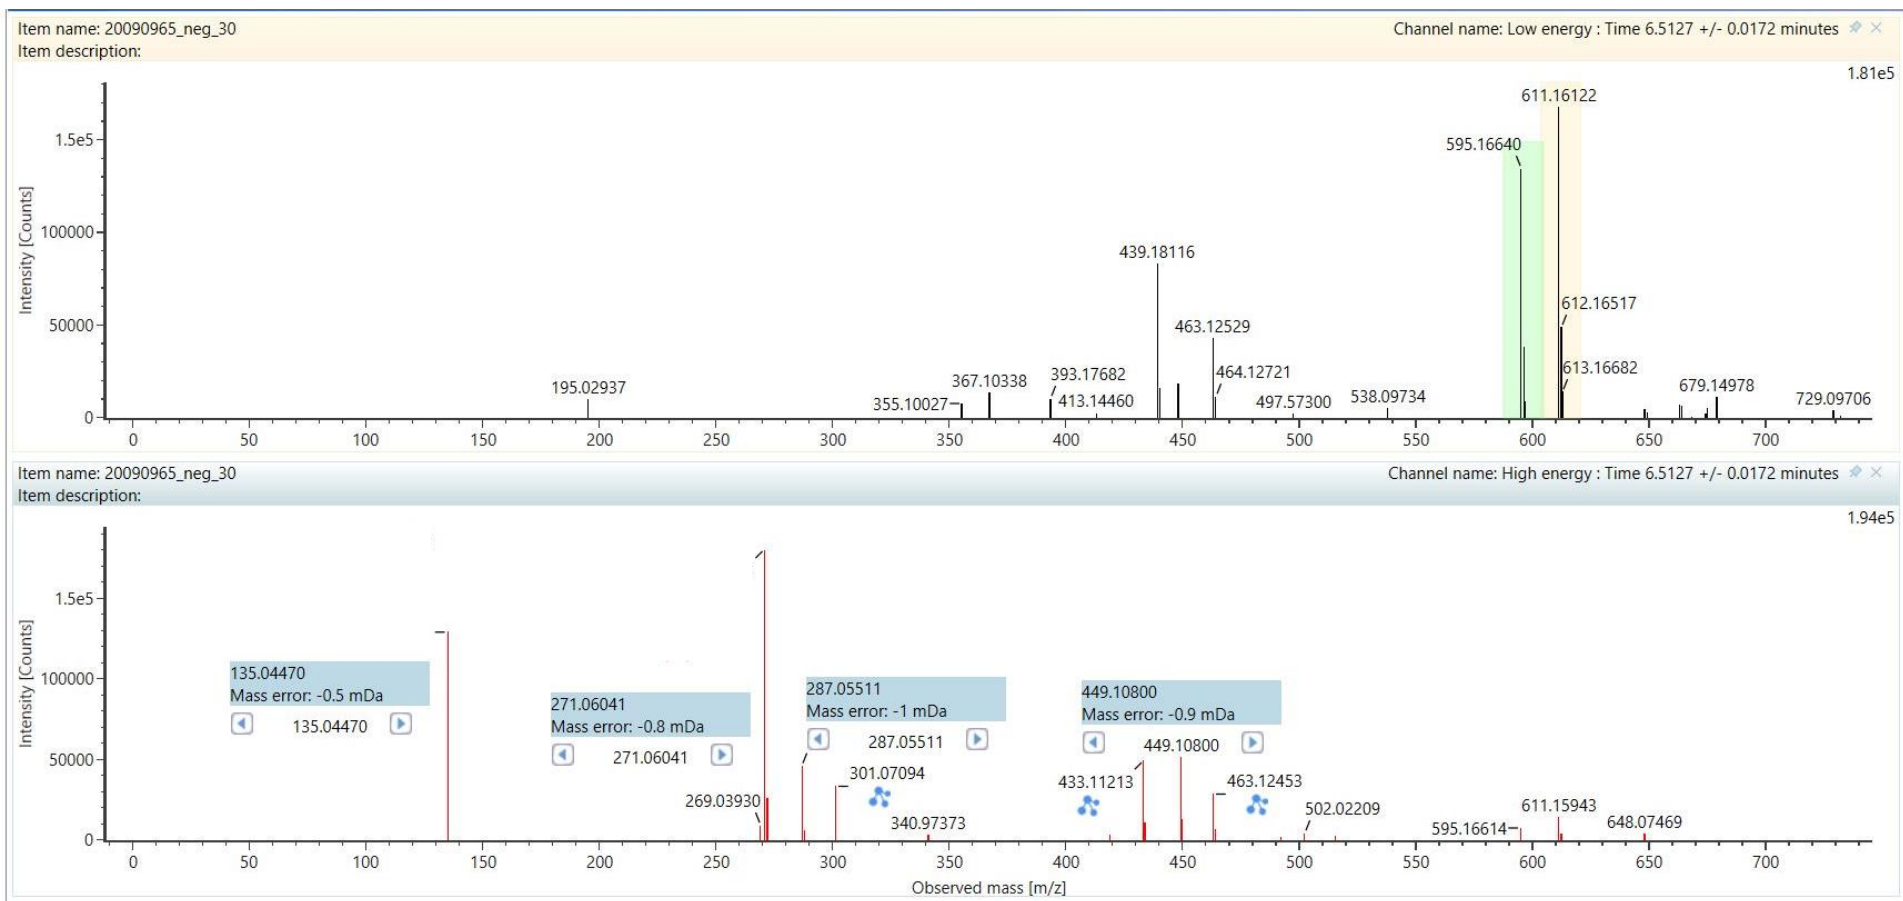

**Figure S16.** ESI-QToF-MS spectrum of fisetin-3,7-O-diglucoside (peak 15)

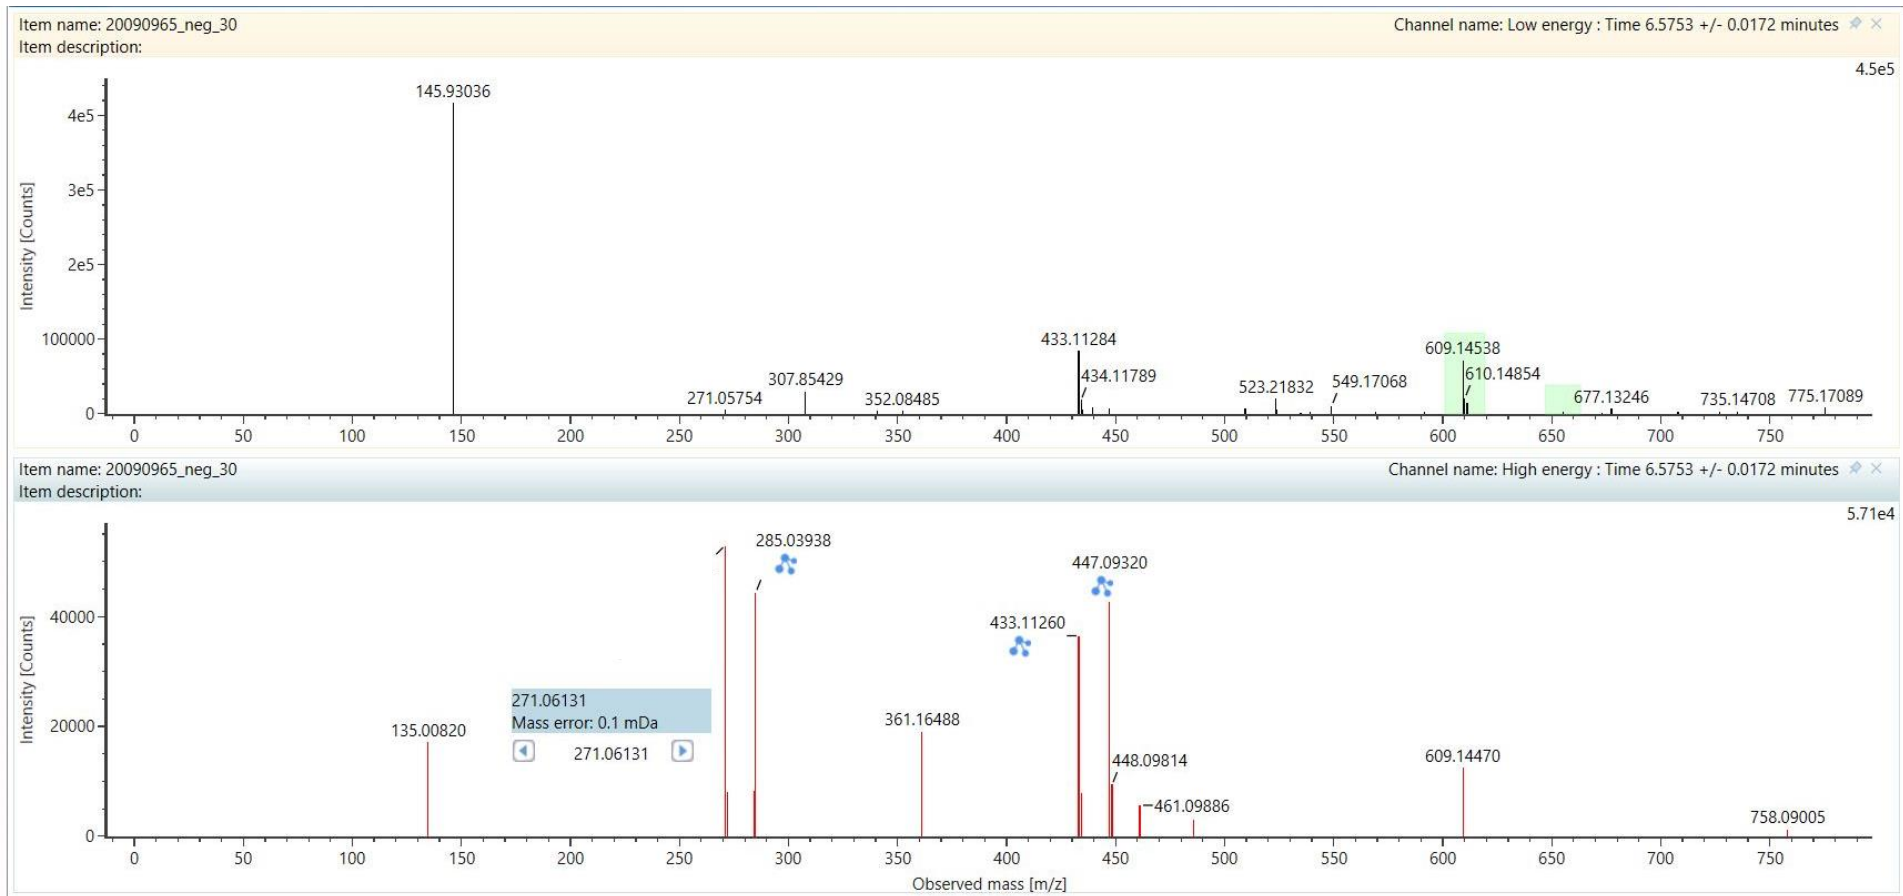

**Figure S17.** ESI-QToF-MS spectrum of isookanin (peak 16)

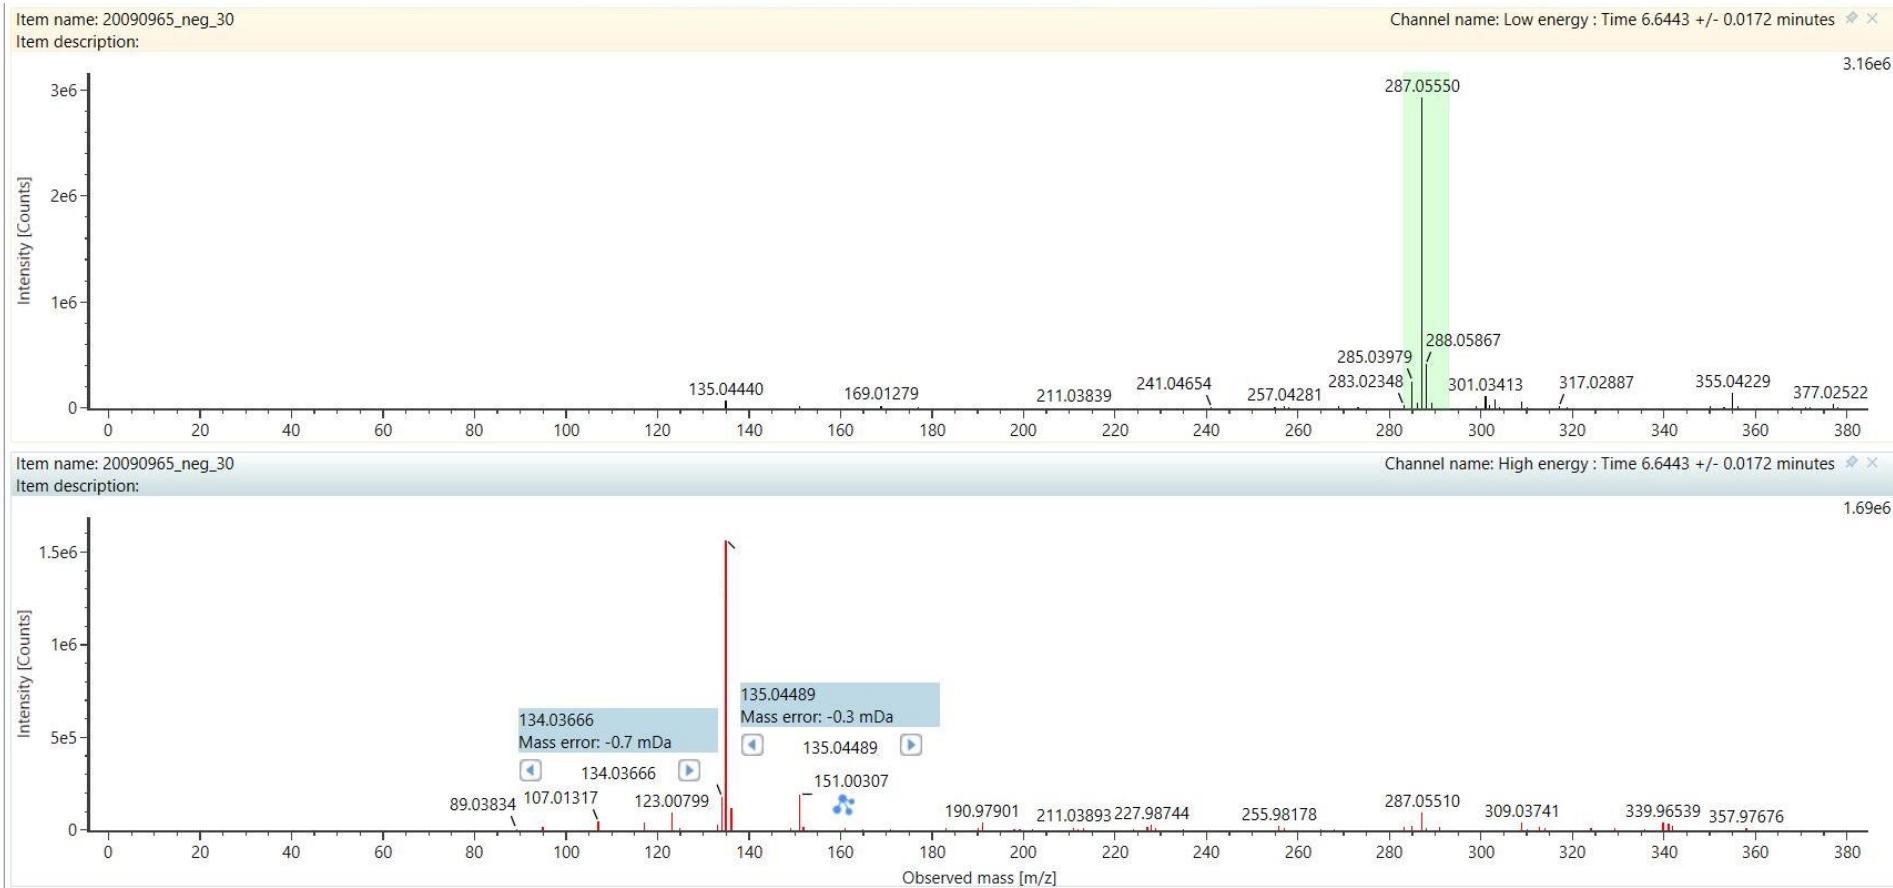

**Figure S18.** ESI-QToF-MS spectrum of taxifolin (peak 17)

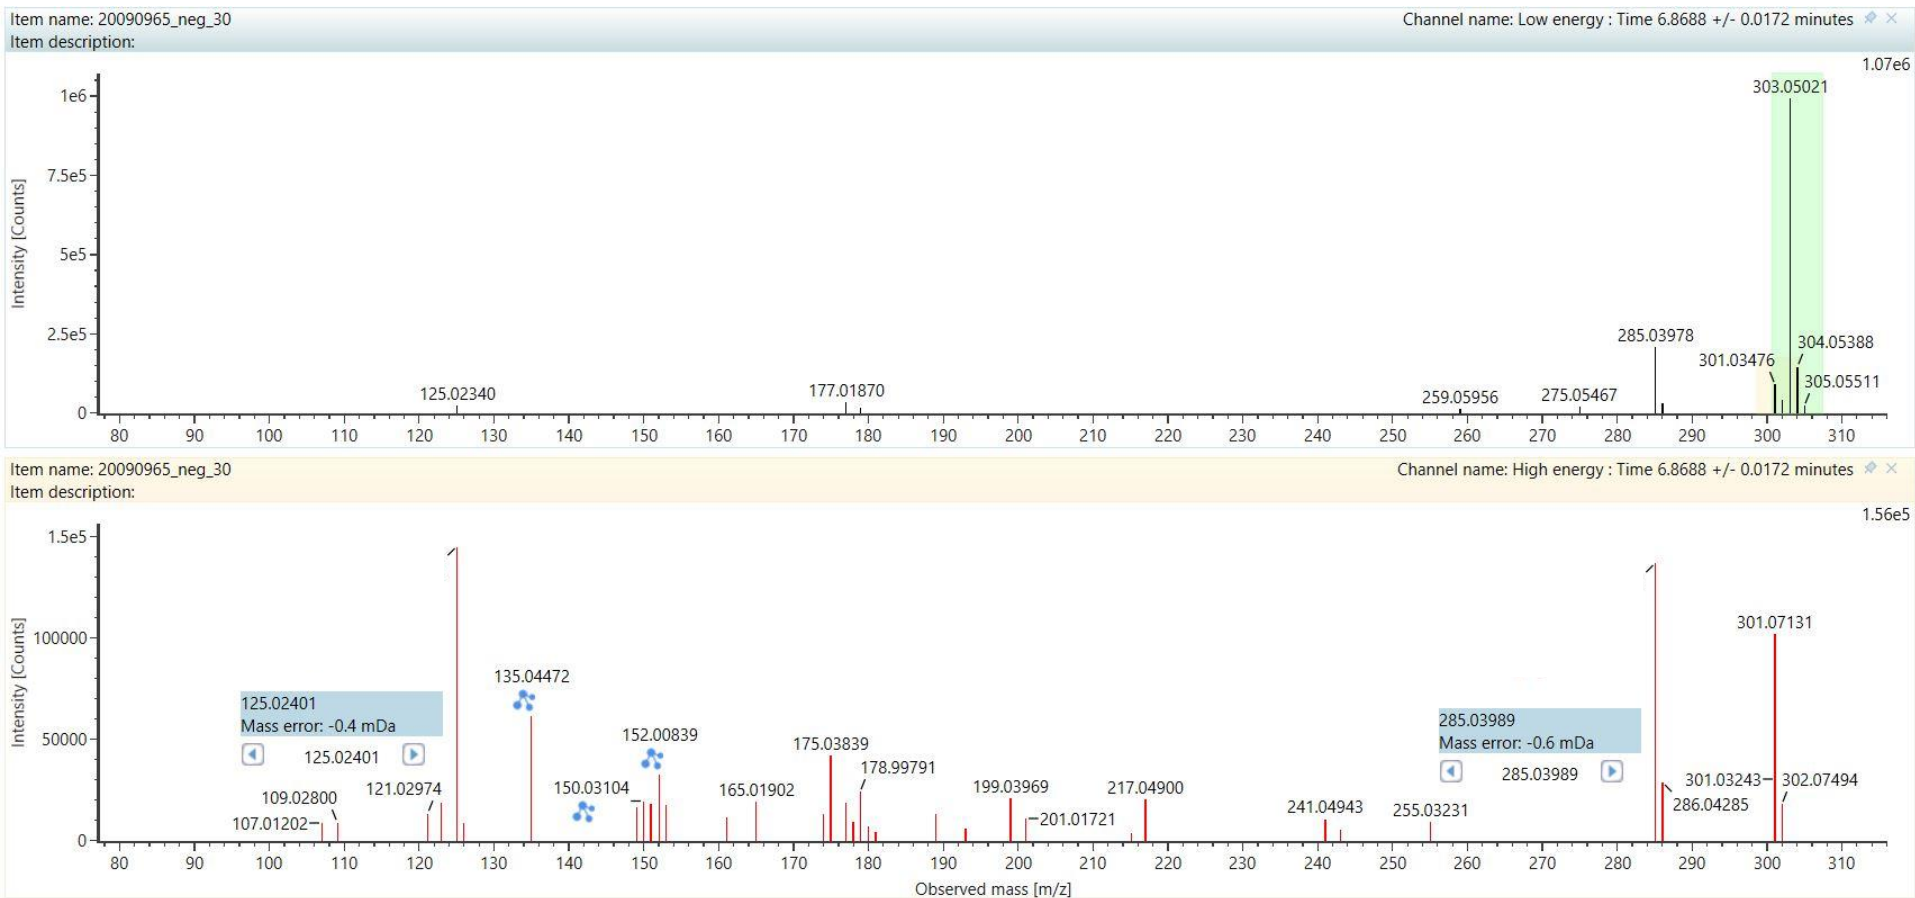

**Figure S19.** ESI-QToF-MS spectrum of 4',5,7,8-tetrahydroxyflavanone-7-O-(6-O-arabinosyl-glucoside) (peak 18)

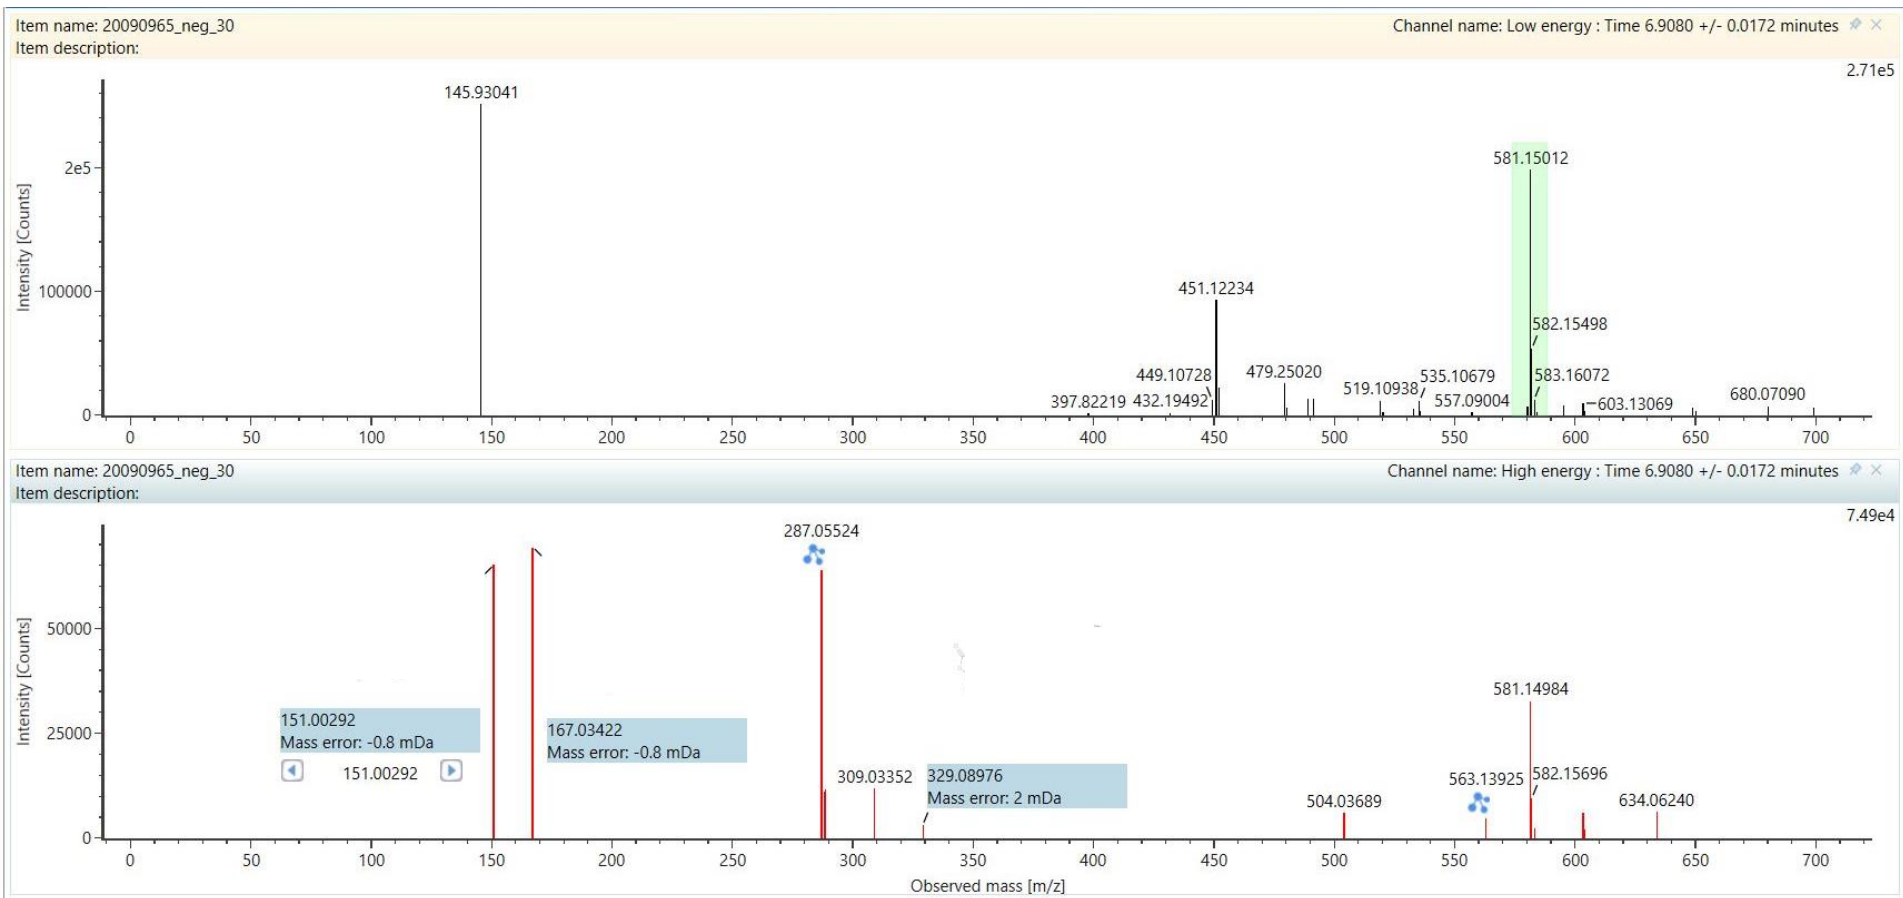



**Figure S20.** ESI-QToF-MS spectrum of sulfuretin-6-O-glucoside (peak 19)

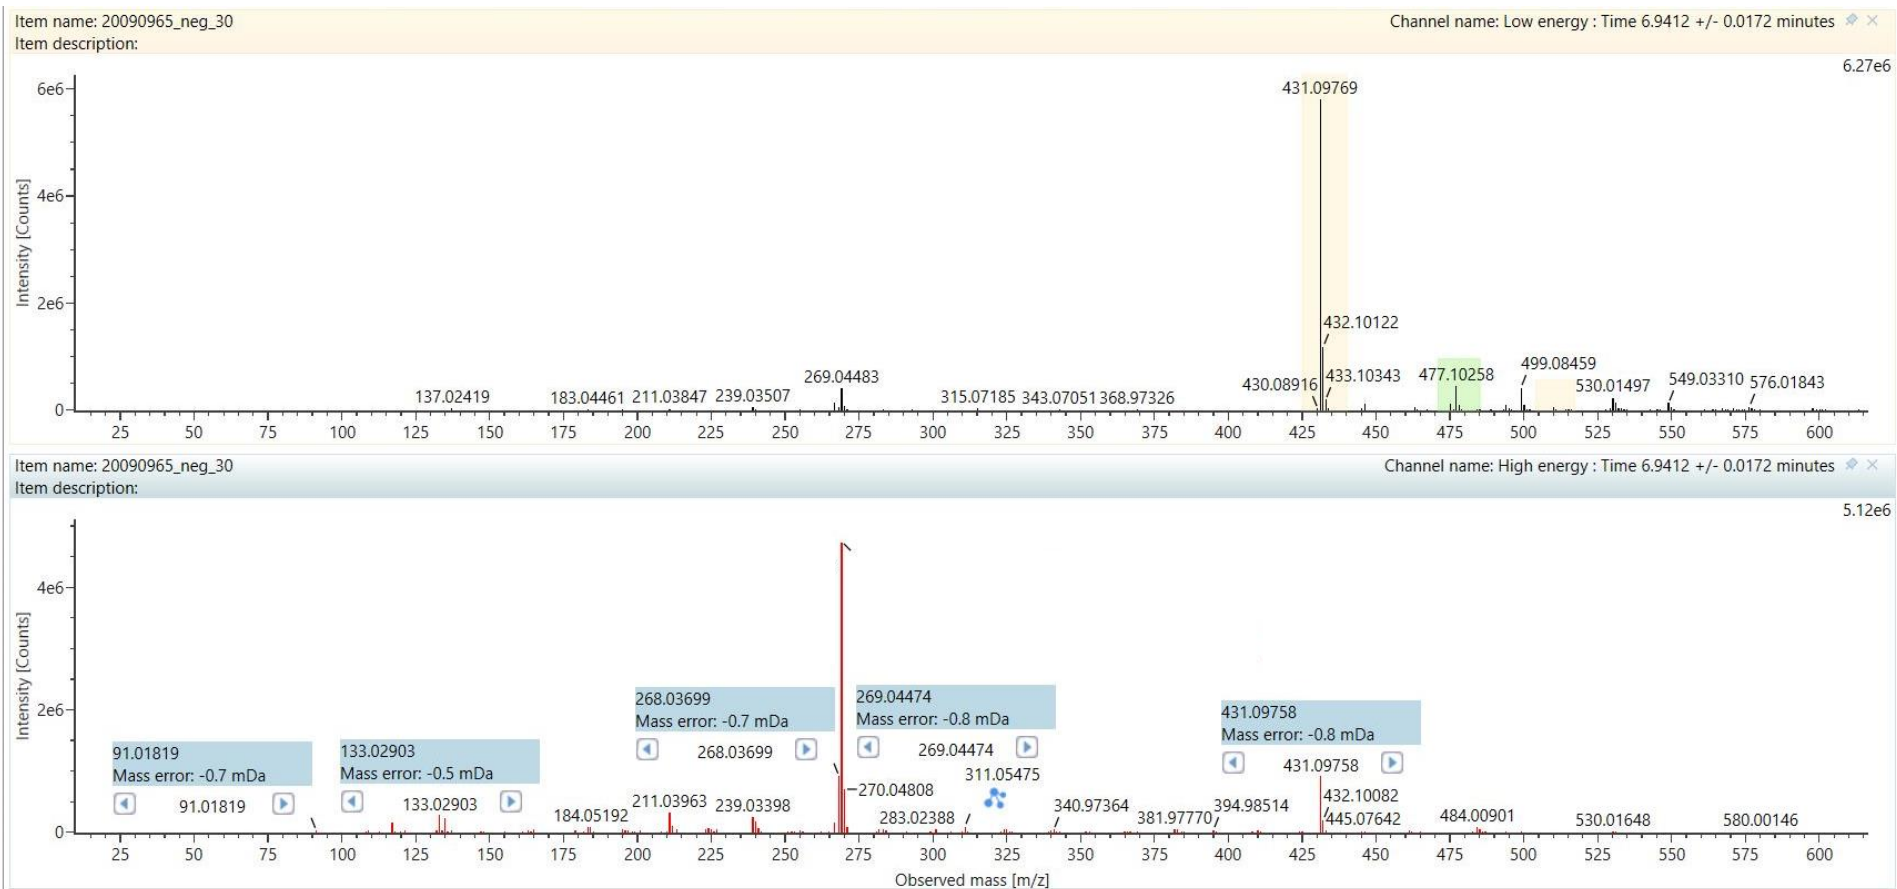

**Figure S21.** ESI-QToF-MS spectrum of quercetin-7-O-glucoside (peak 20)

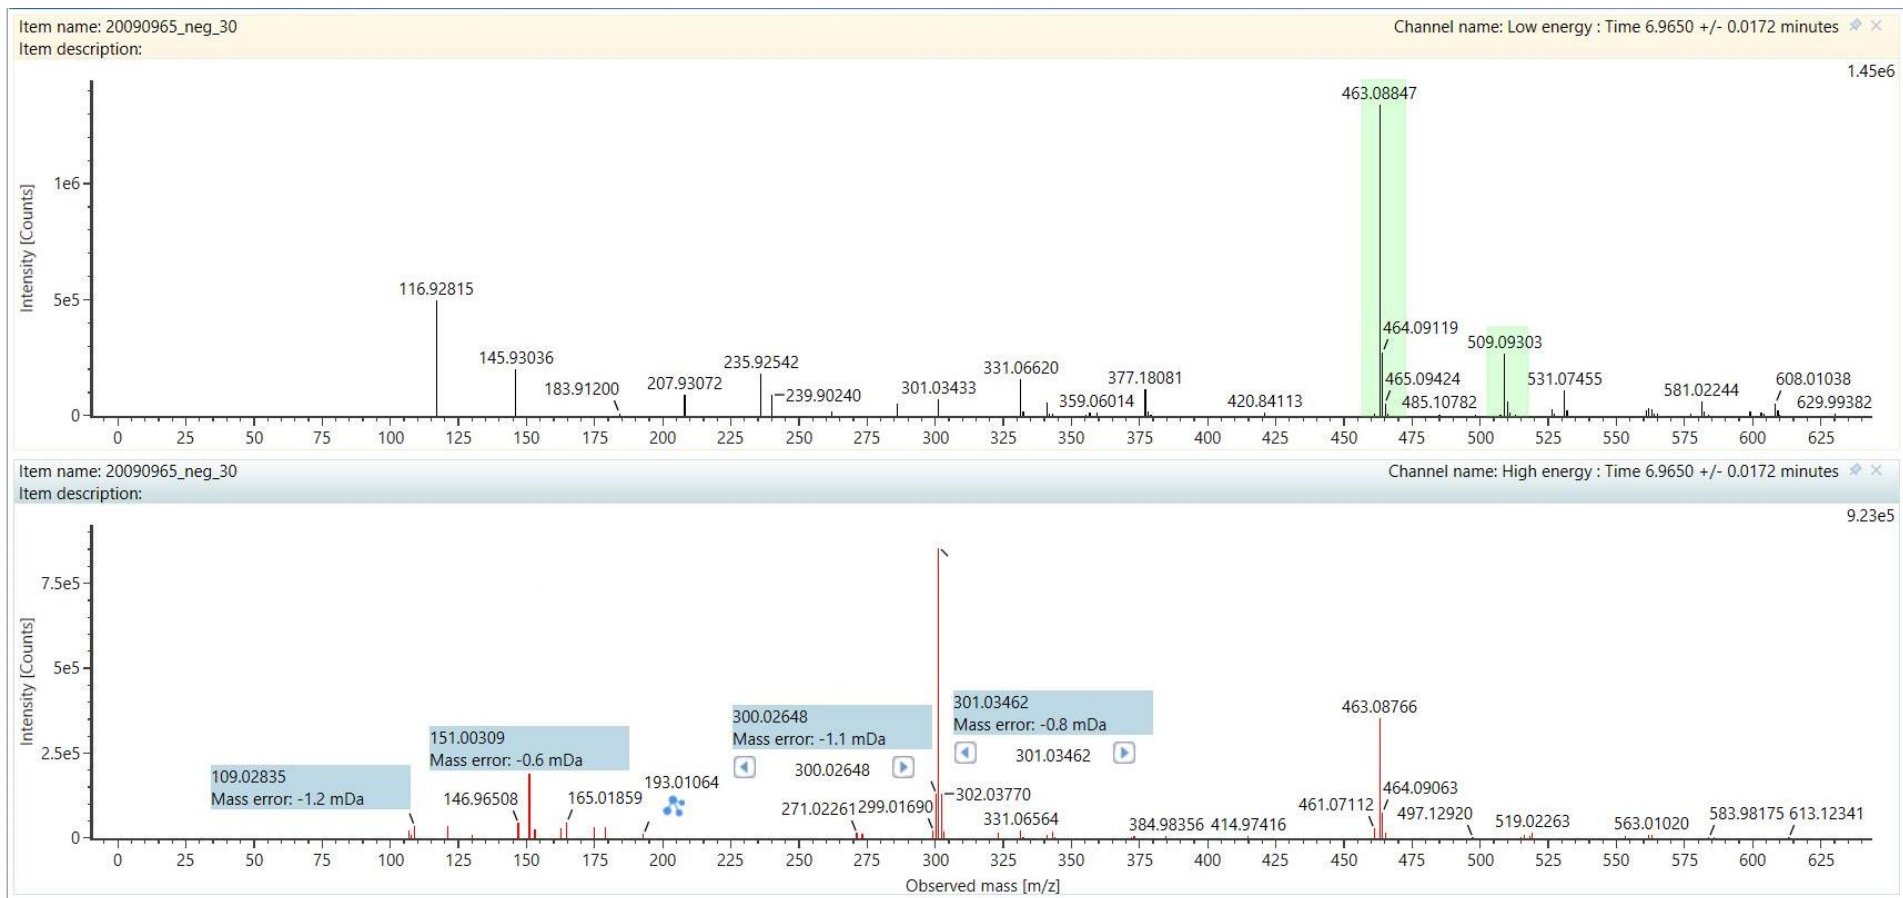

**Figure S22.** ESI-QToF-MS spectrum of maritimein (peak 21)

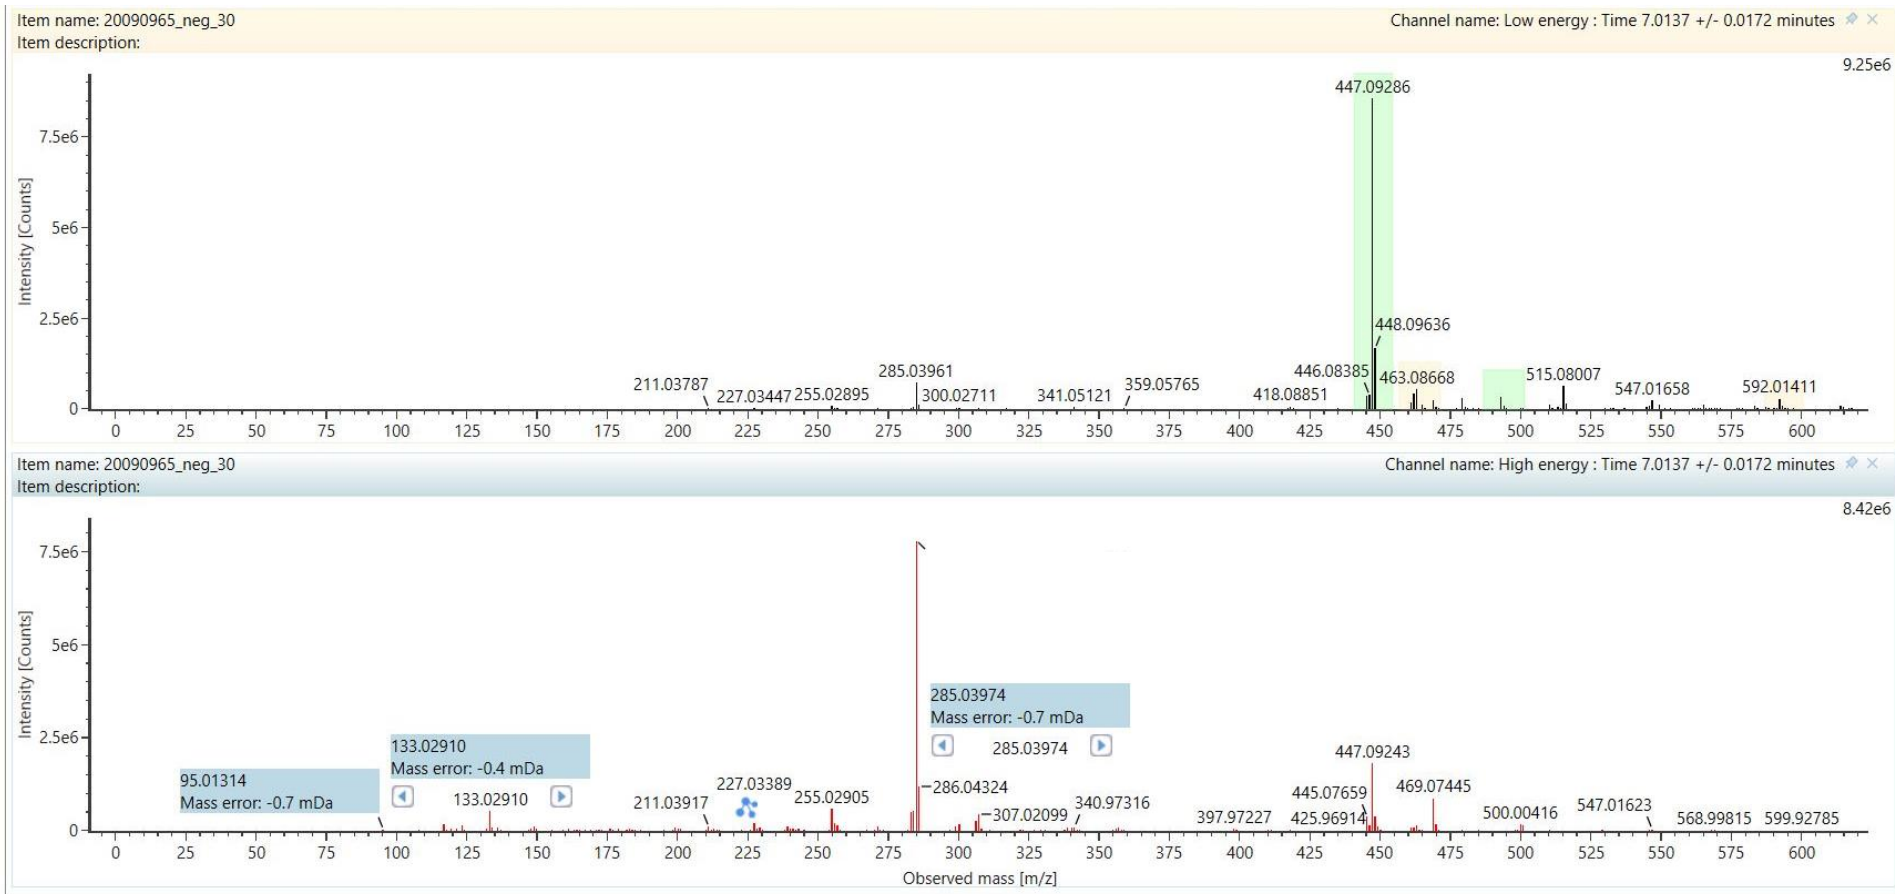

**Figure S23.** ESI-QToF-MS spectrum of luteolin-7-O-glucoside (peak 22)

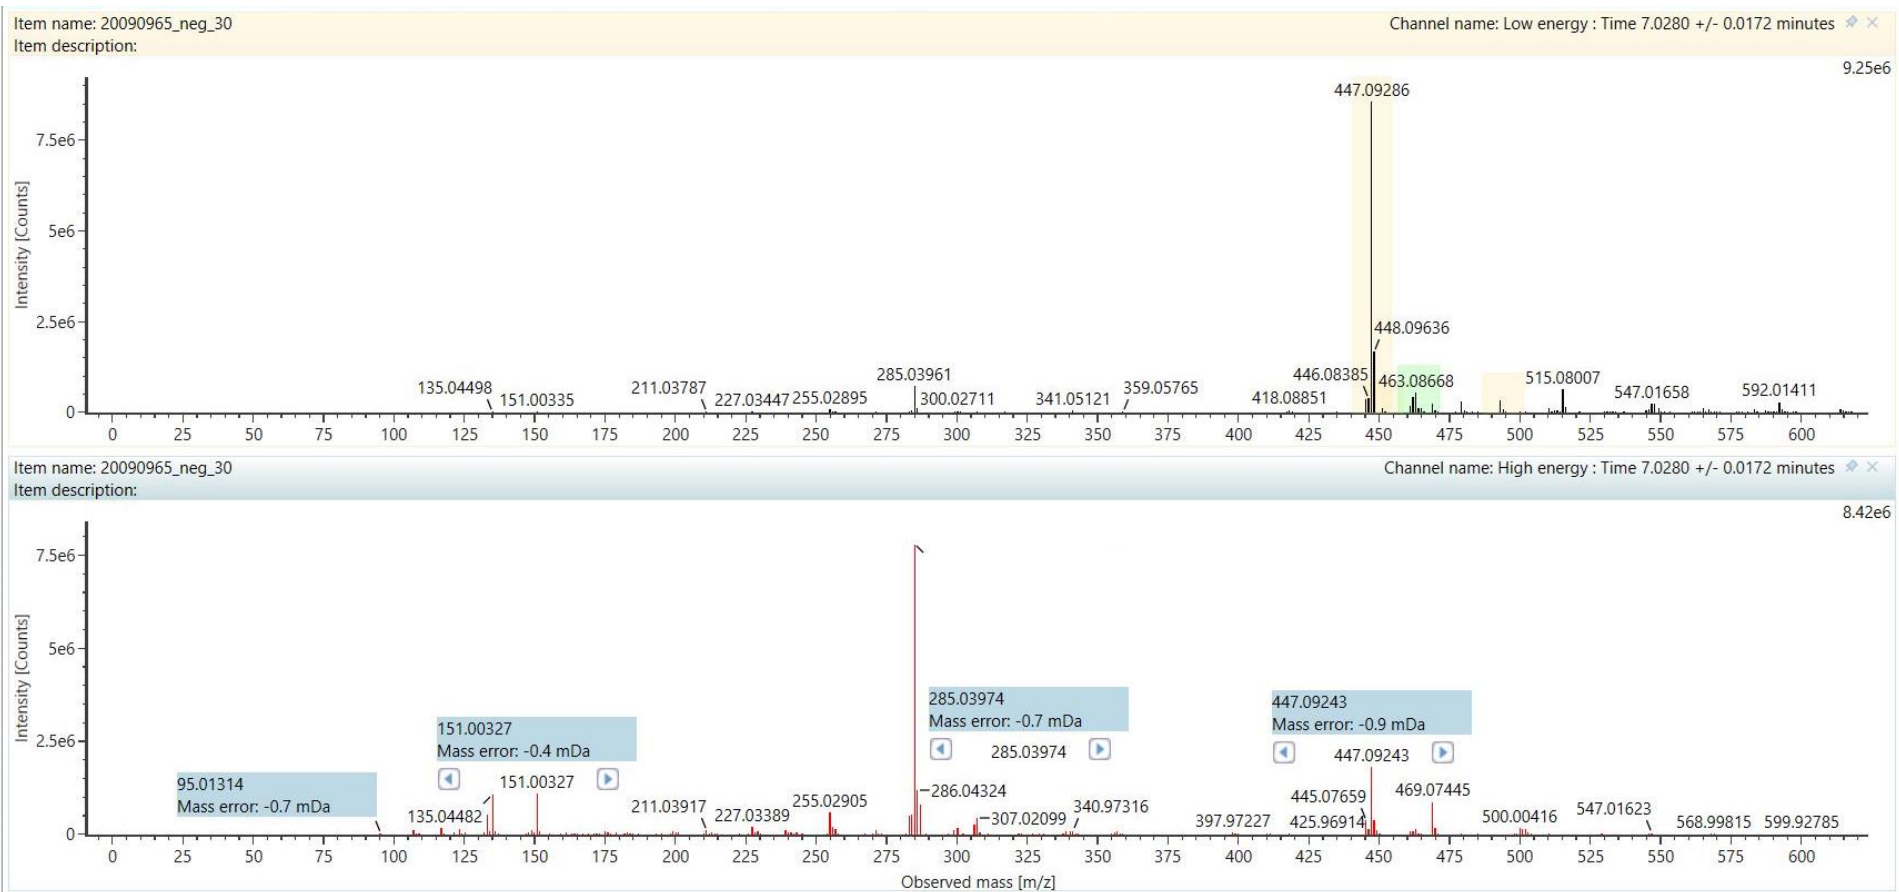

**Figure S24.** ESI-QToF-MS spectrum of marein (peak23 )

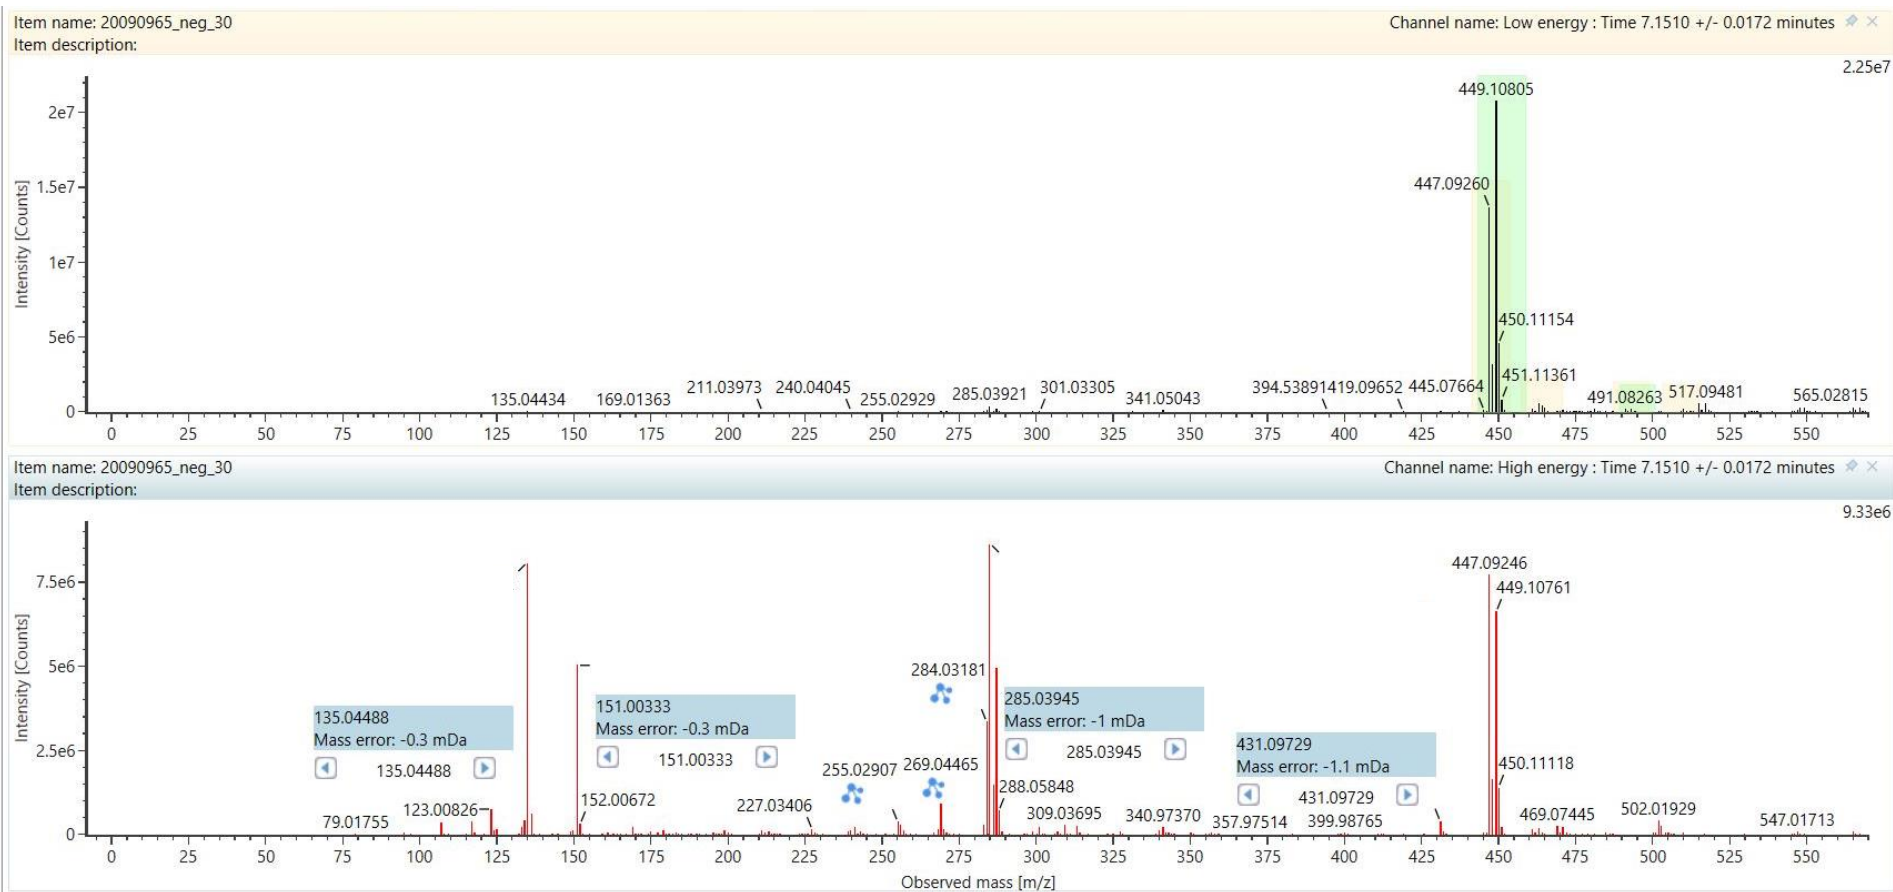

**Figure S25.** ESI-QToF-MS spectrum of taxifolin 3',7-dimethyl ether 3-O-glucoside (peak 24)

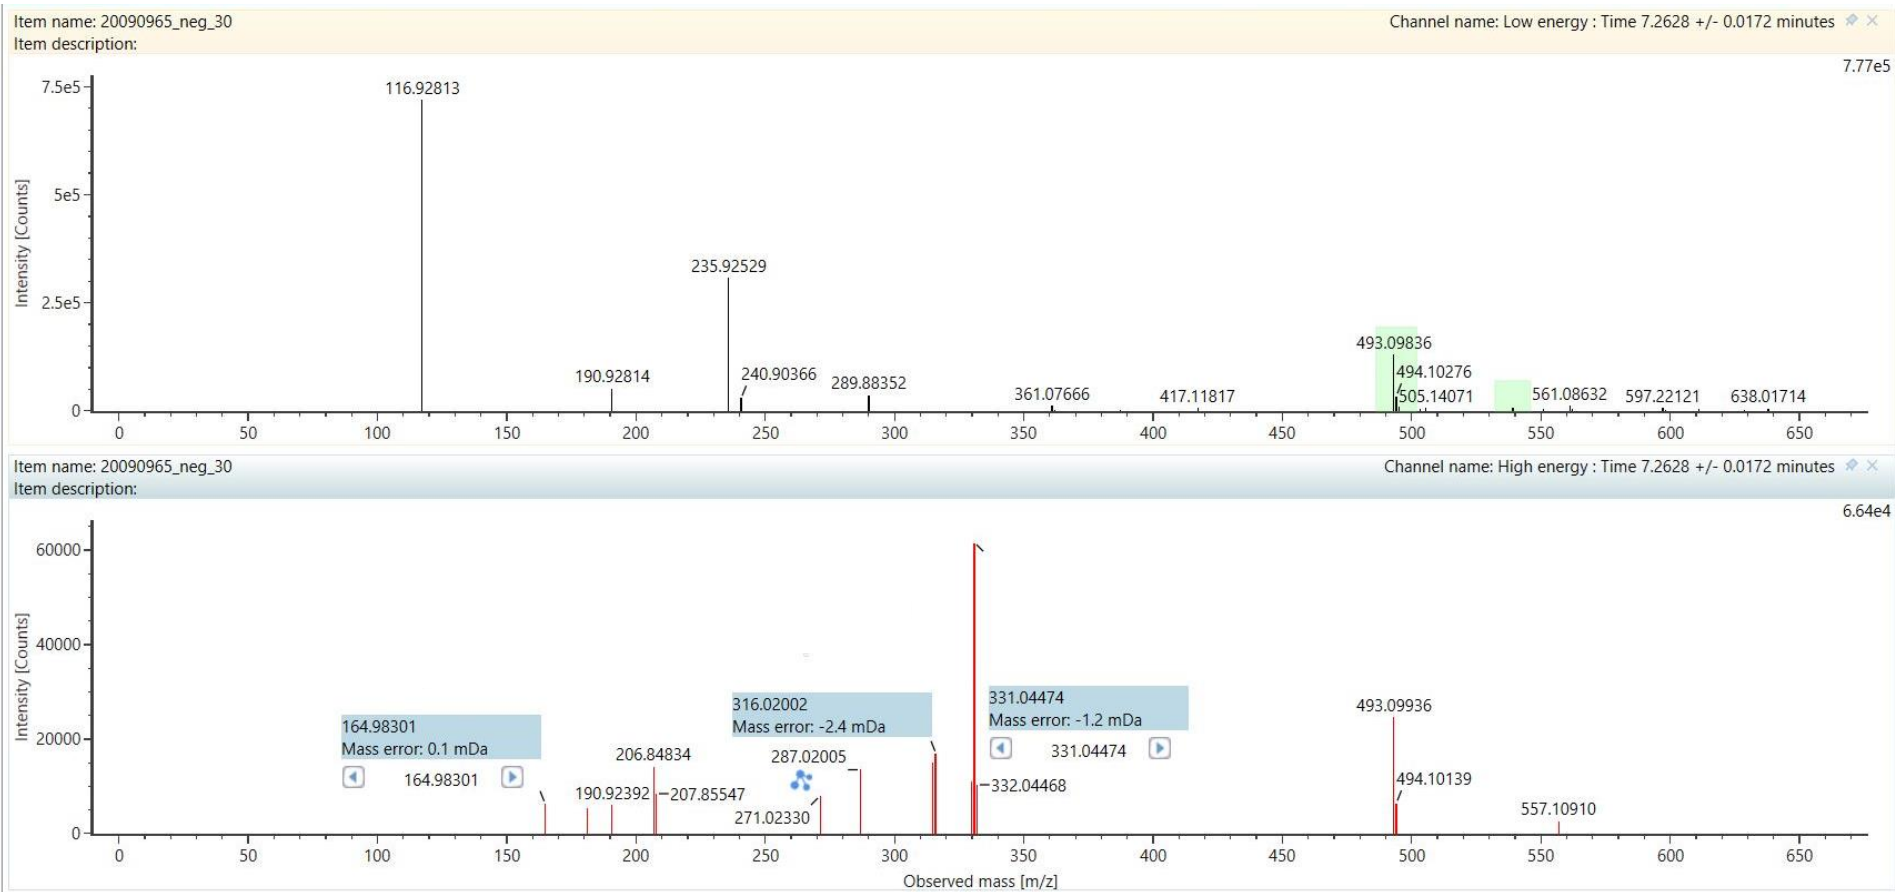

**Figure S26.** ESI-QToF-MS spectrum of 3,3',4'-trihydroxy-7-methoxyflavone 3-O-glucoside (peak 25)

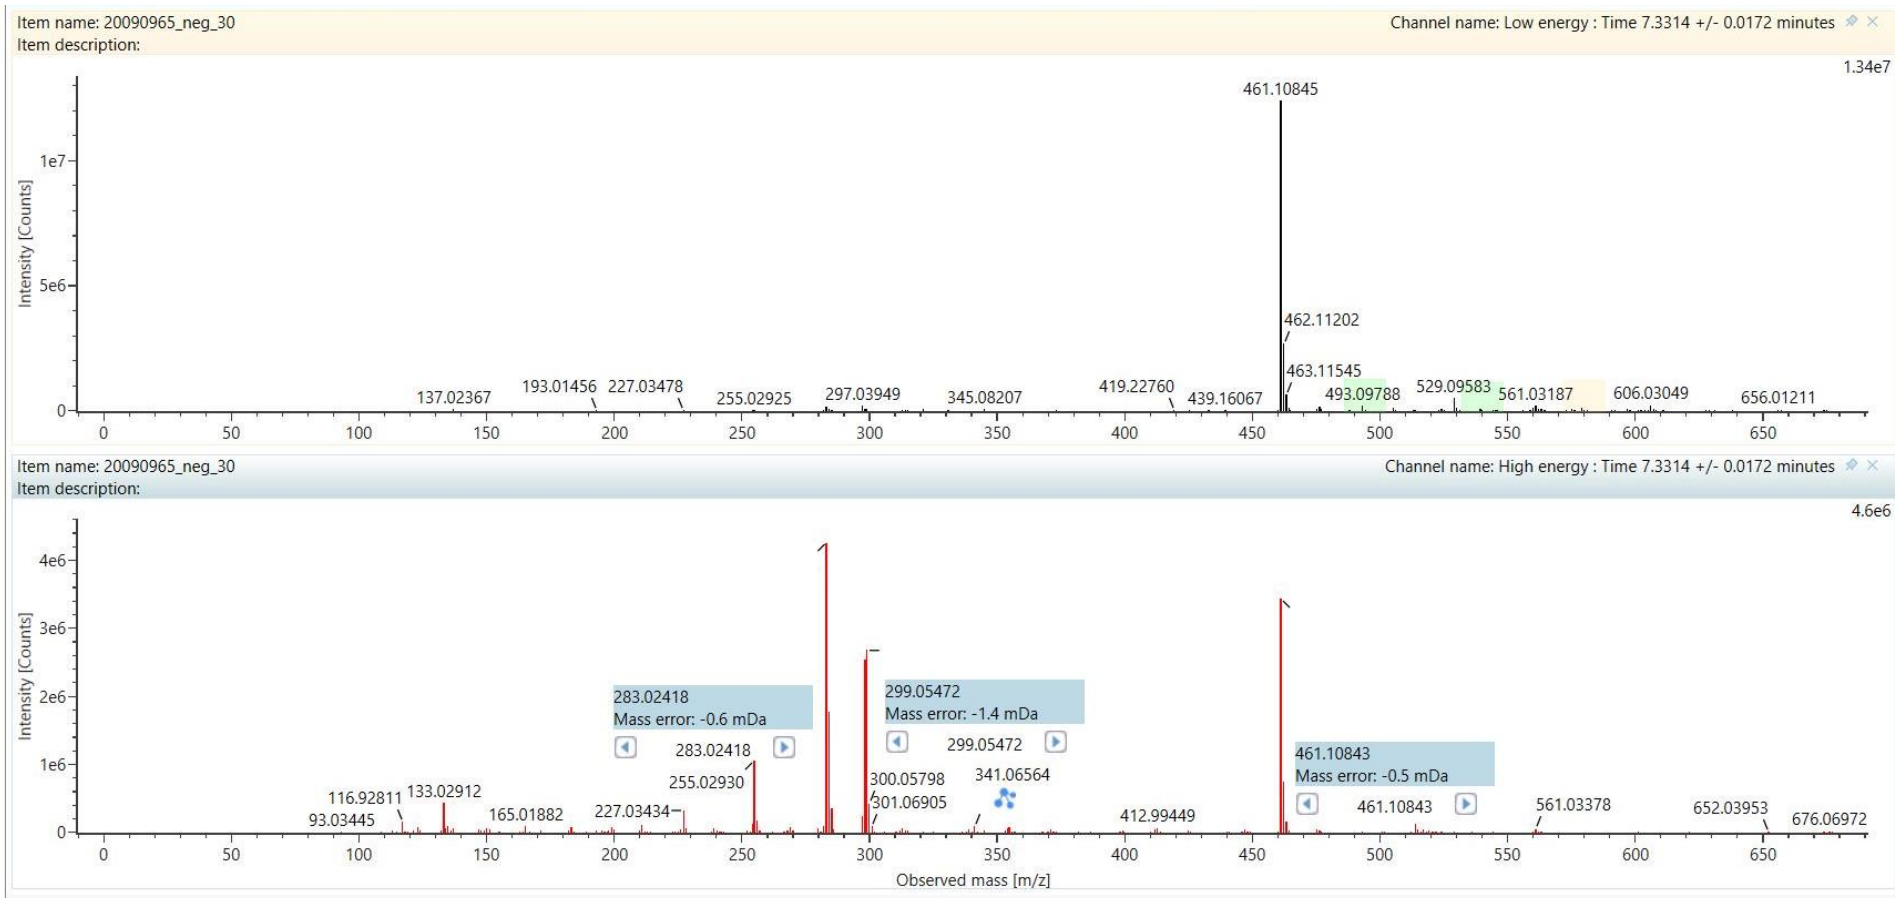



**Figure S27.** ESI-QToF-MS spectrum of qurcetagenin-7-O-(6''-caffeoylglucoside) (peak 26)

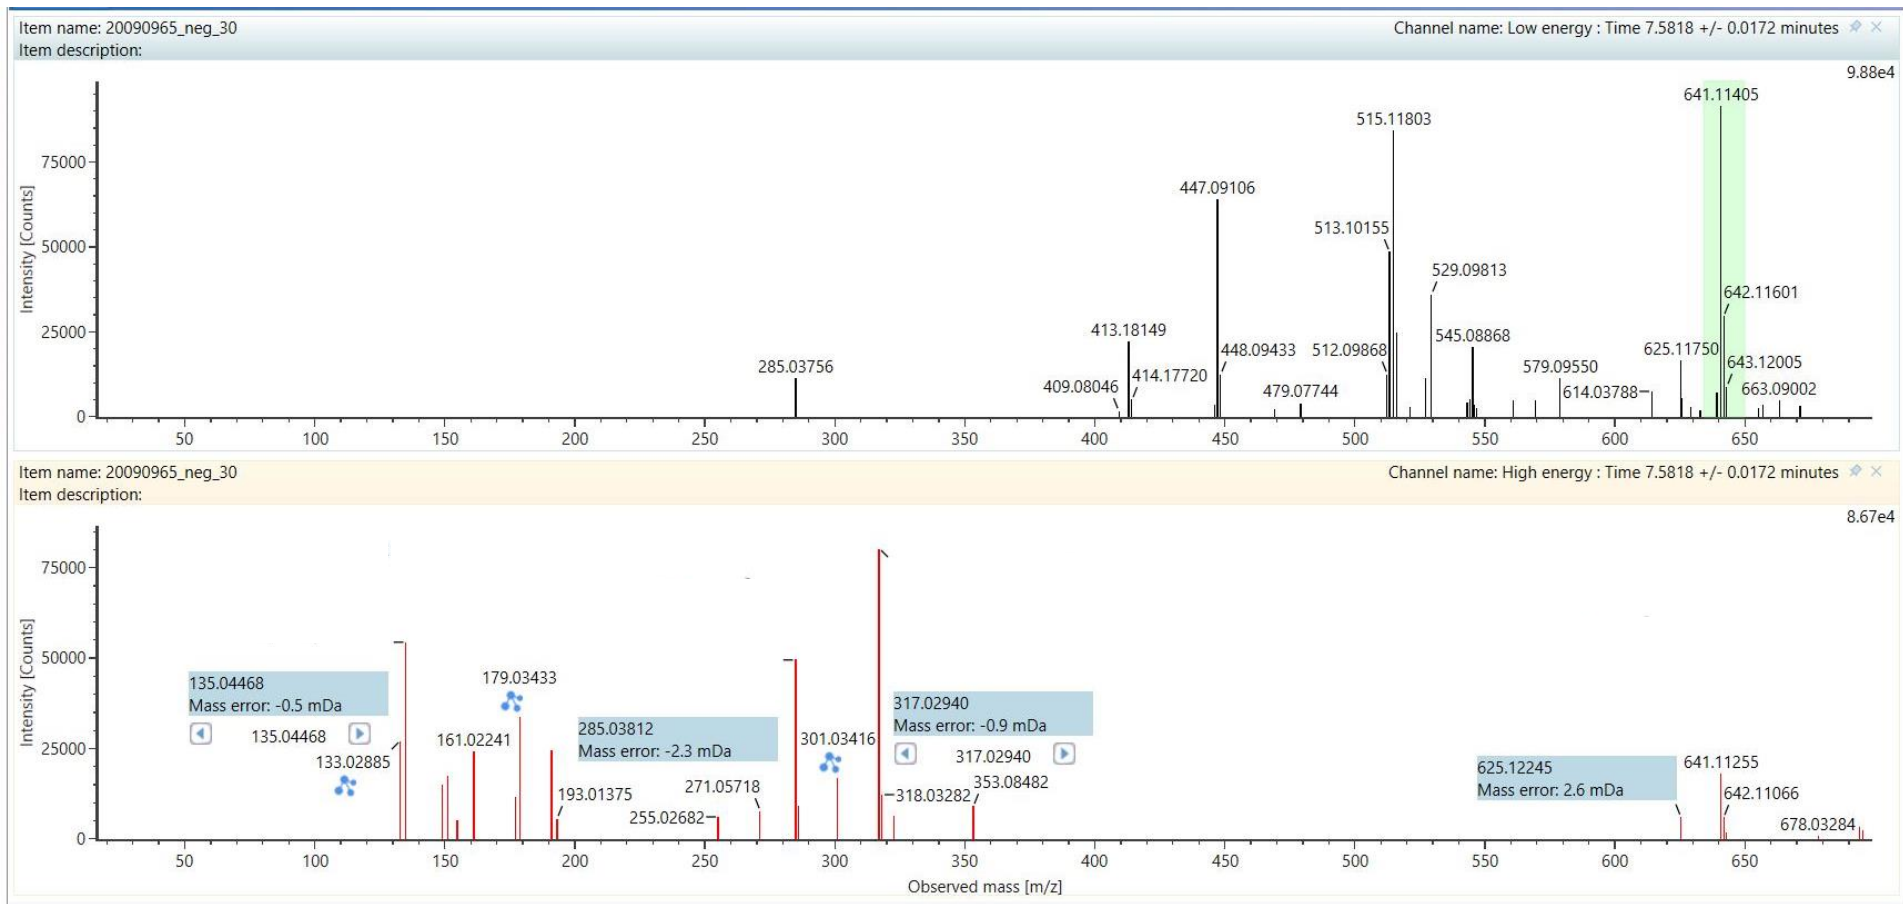



**Figure S28.** ESI-QToF-MS spectrum of 3,5-dicaffeoylquinic acid (peak 27)

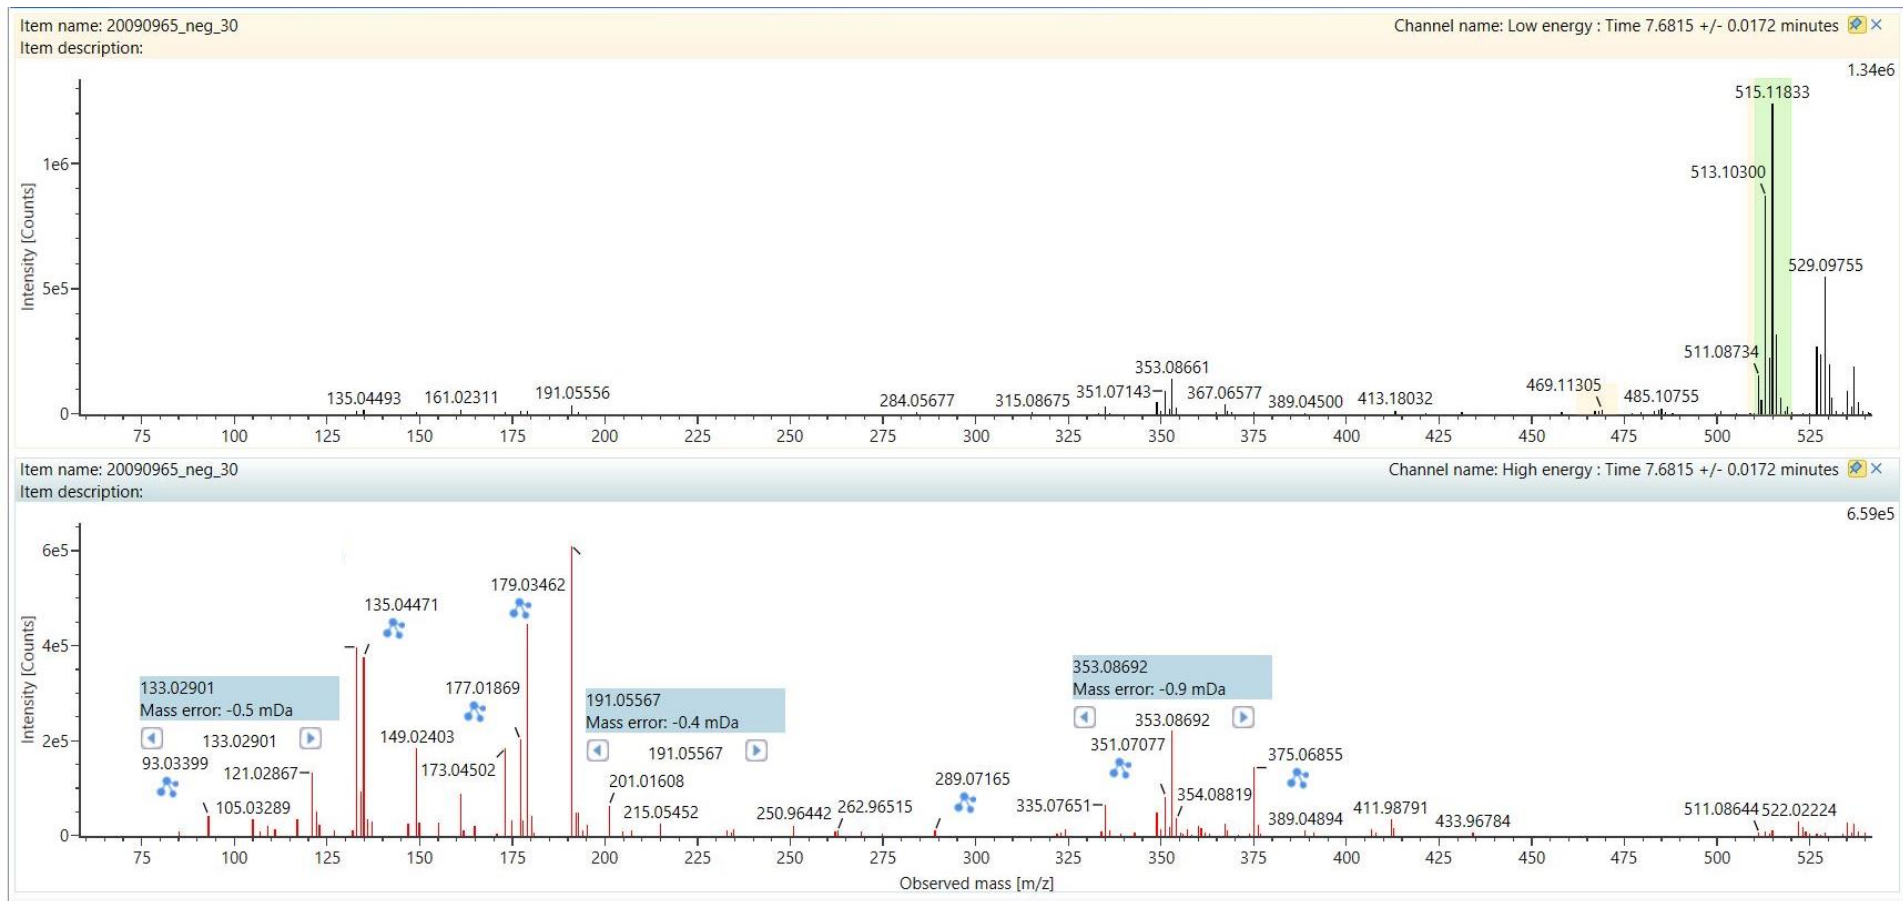

**Figure S29.** ESI-QToF-MS spectrum of sulfuretin (peak 28)

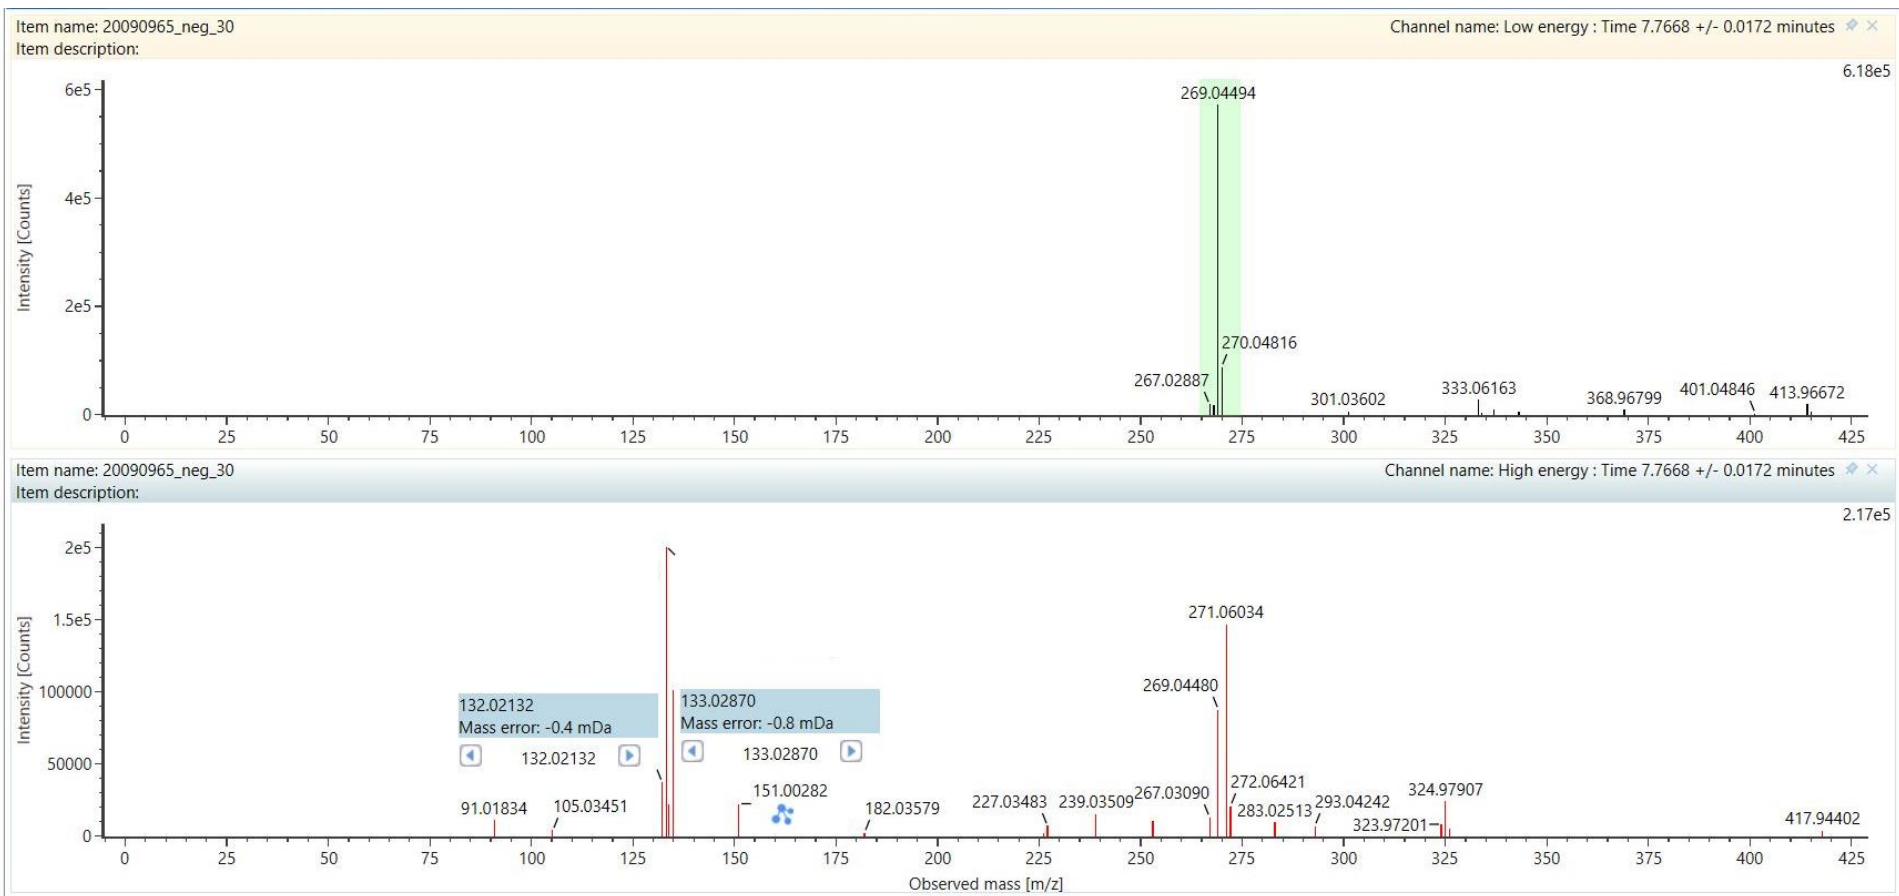

**Figure S30.** ESI-QToF-MS spectrum of luteolin-6-O-rhamnoside (peak 29)

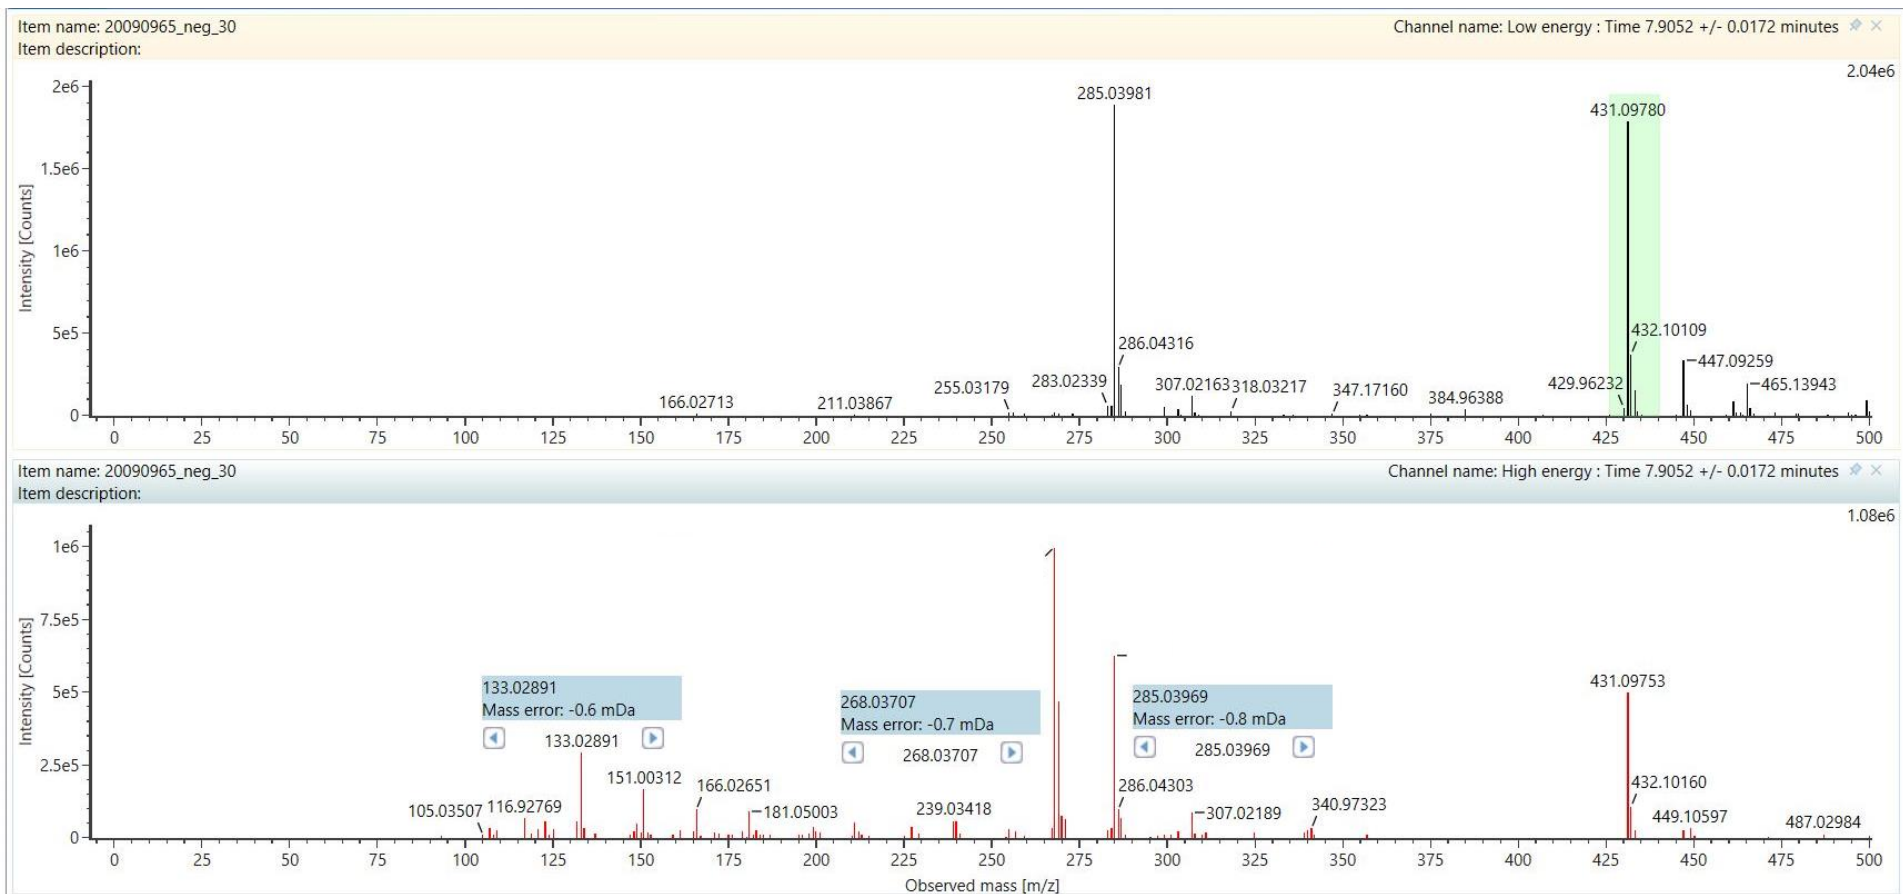

**Figure S31.** ESI-QToF-MS spectrum of coreopsin (peak 30)

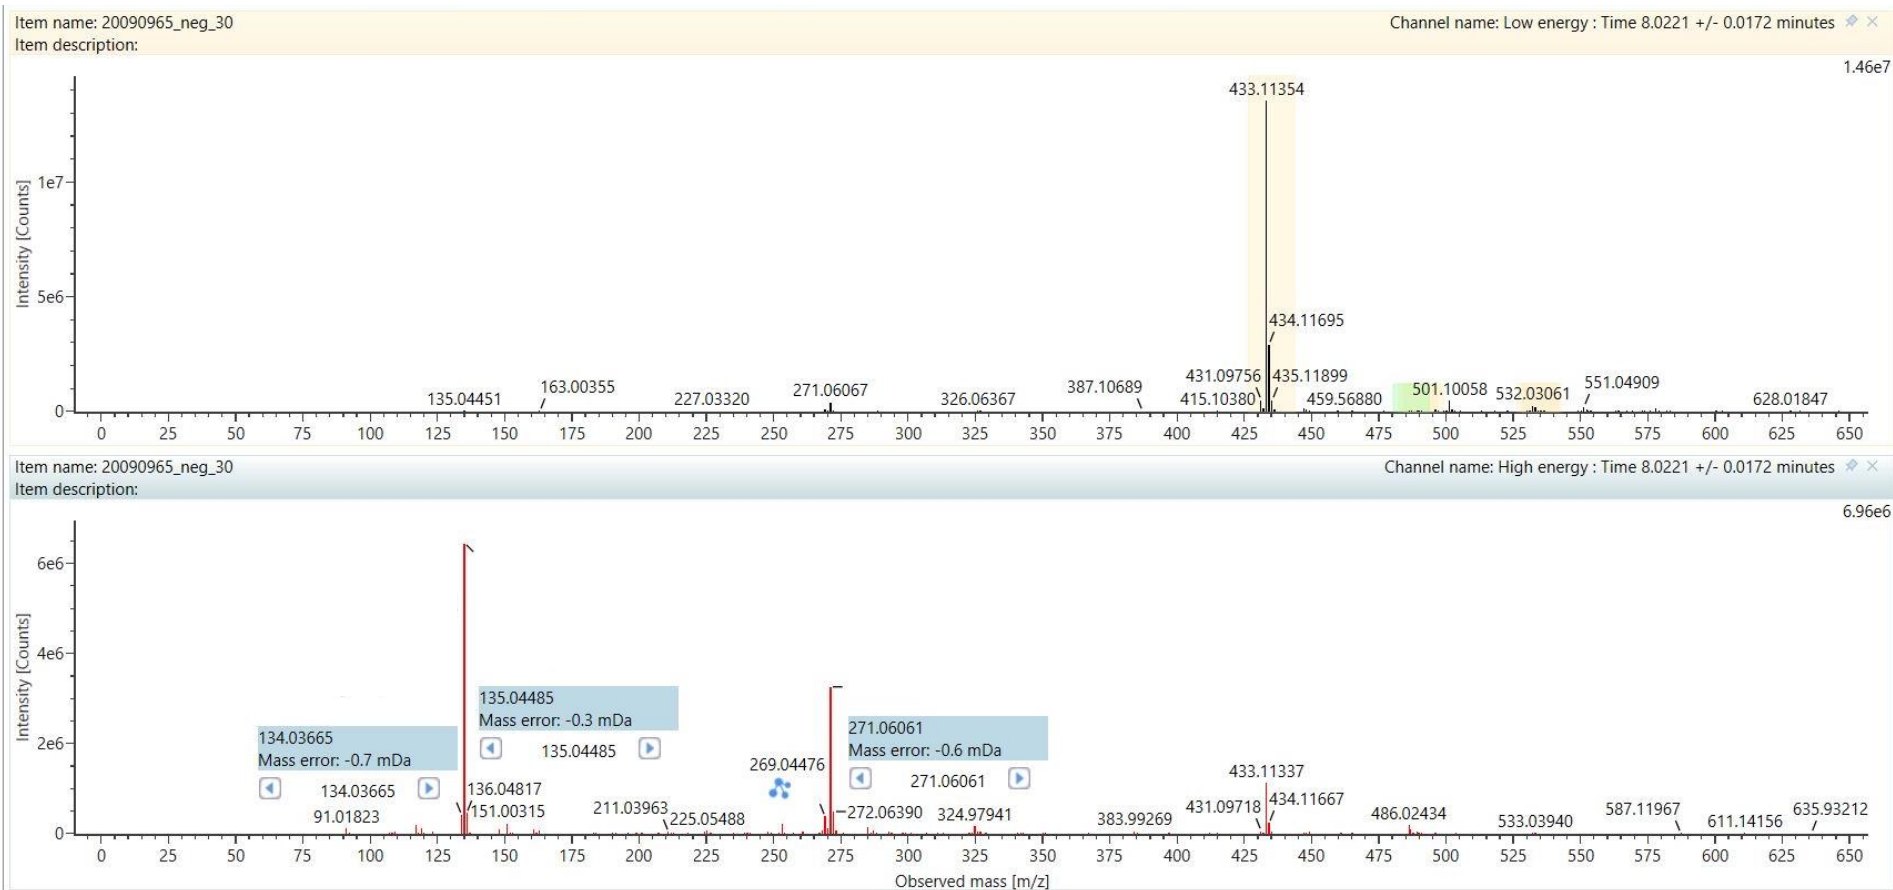

**Figure S32.** ESI-QToF-MS spectrum of 4,5-dicaffeoylquinic acid (peak 31)

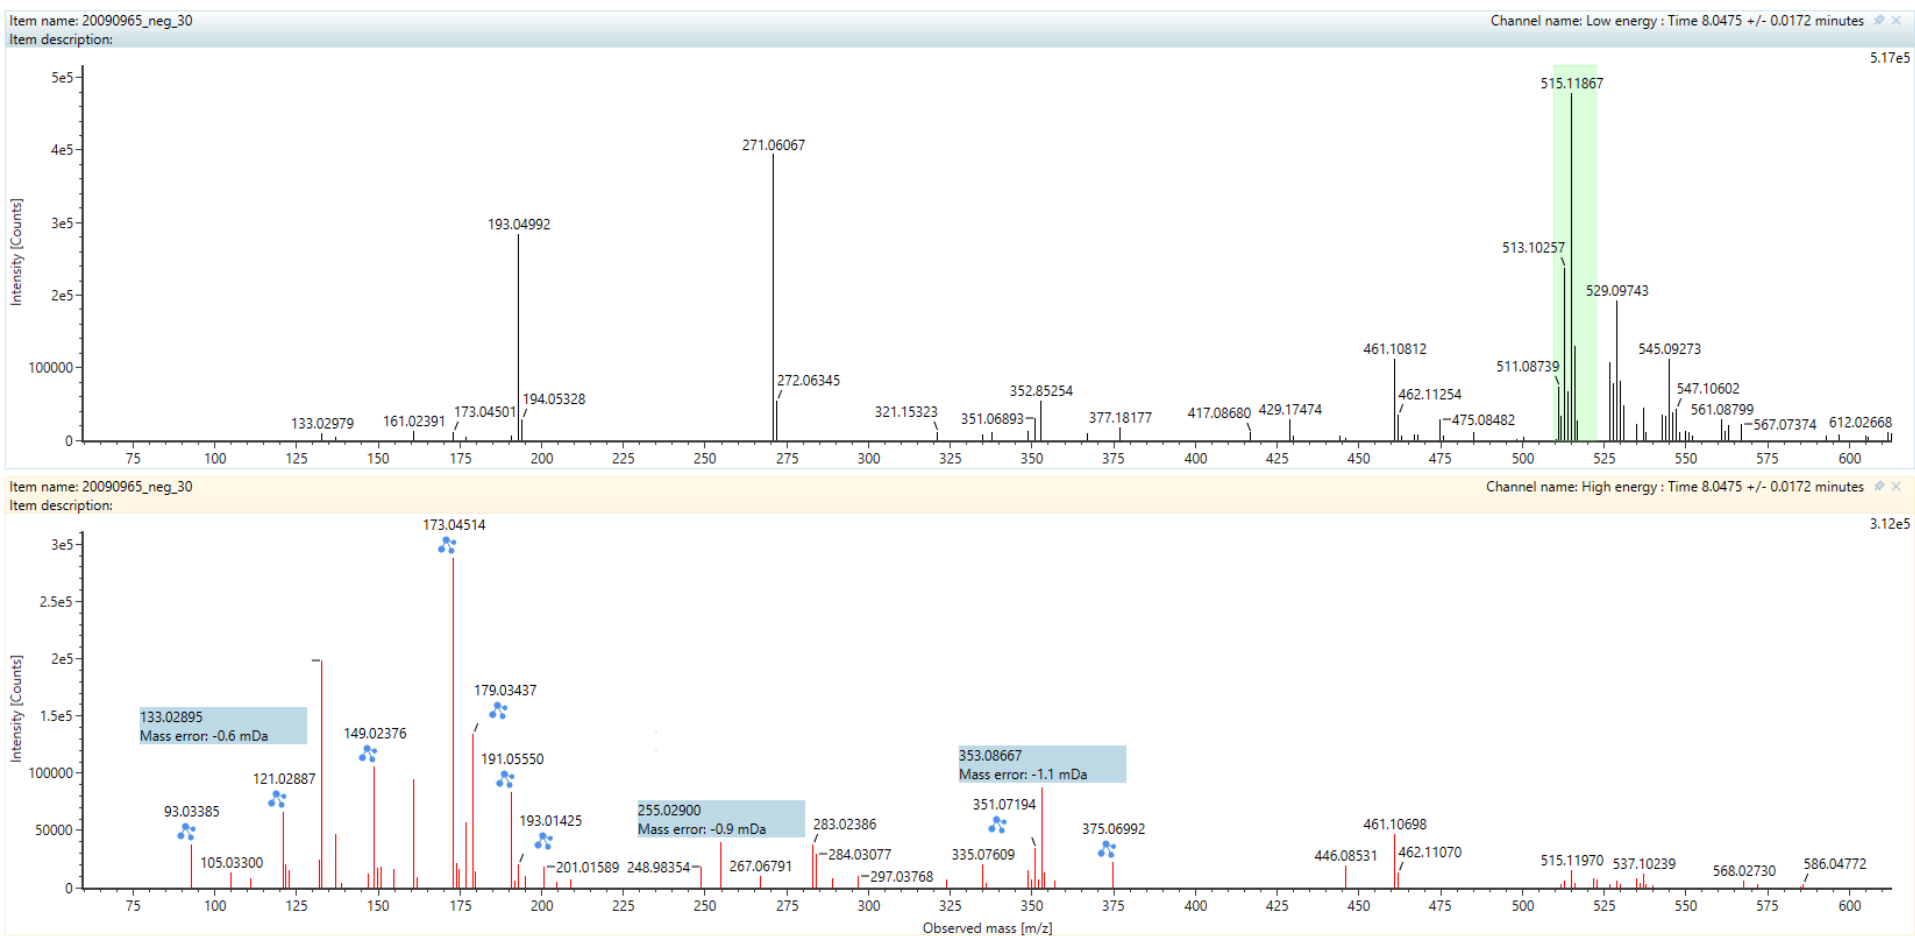

**Figure S33.** ESI-QToF-MS spectrum of okanin (peak 32)

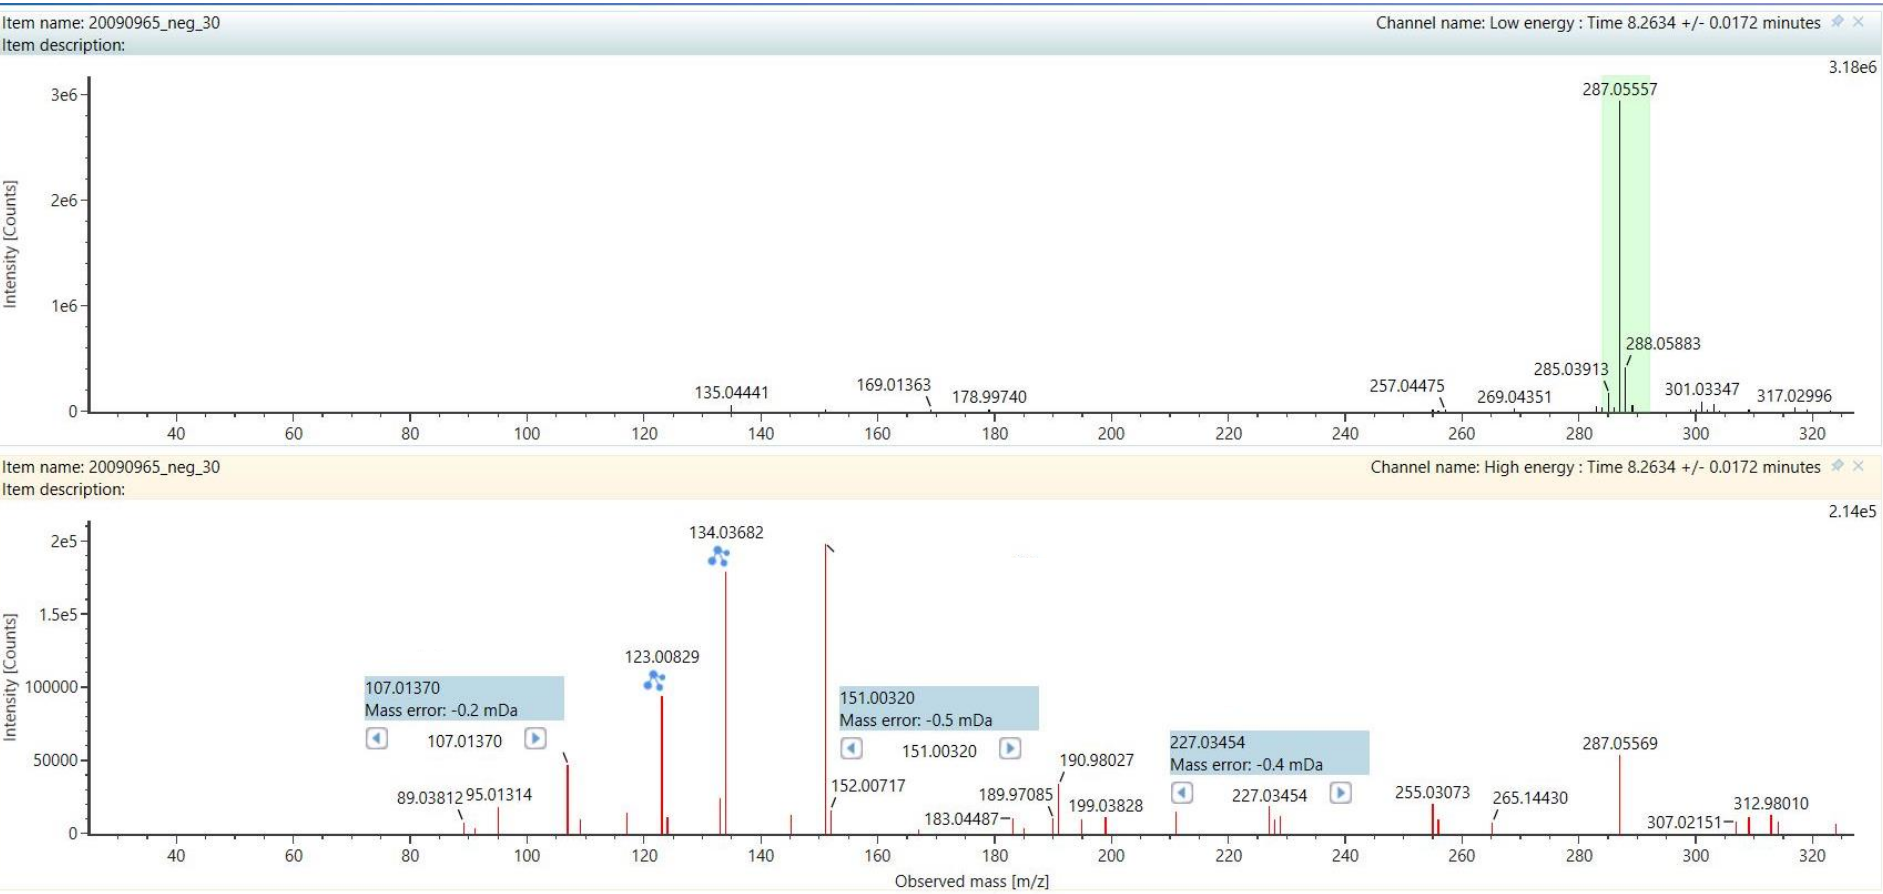

**Figure S34.** ESI-QToF-MS spectrum of eriodictyol chalcone-O-diglucoside (peak 33)

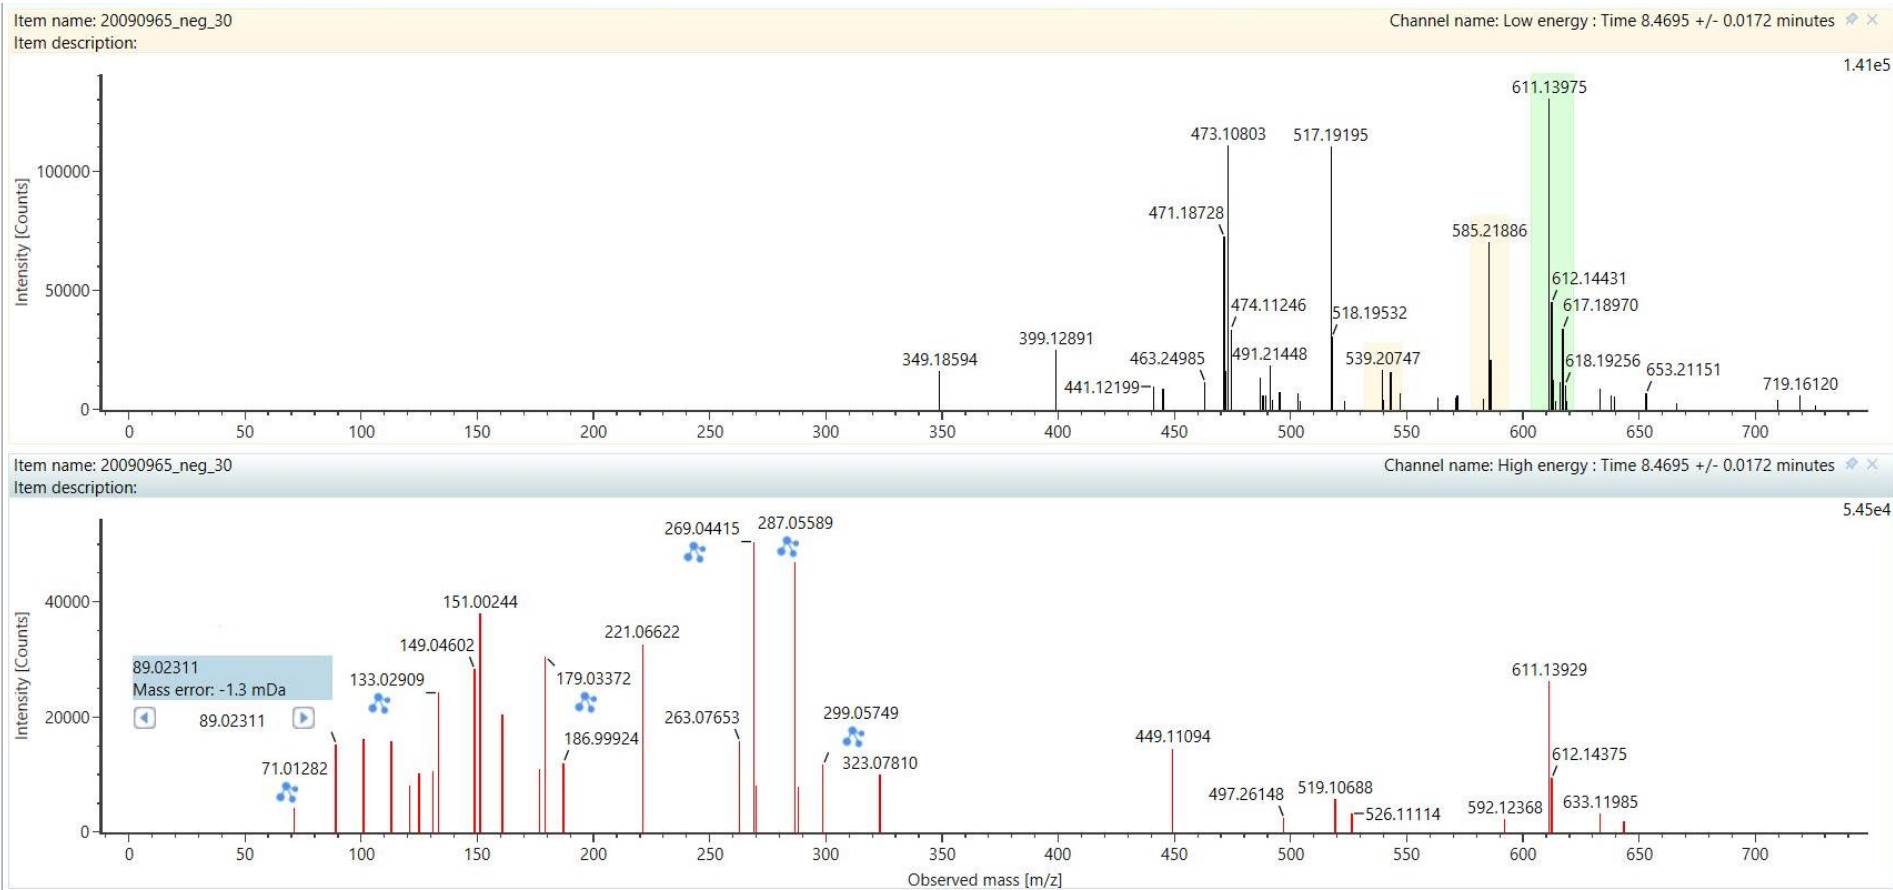

**Figure S35.** ESI-QToF-MS spectrum of eriodictyol chalcone (peak 34)

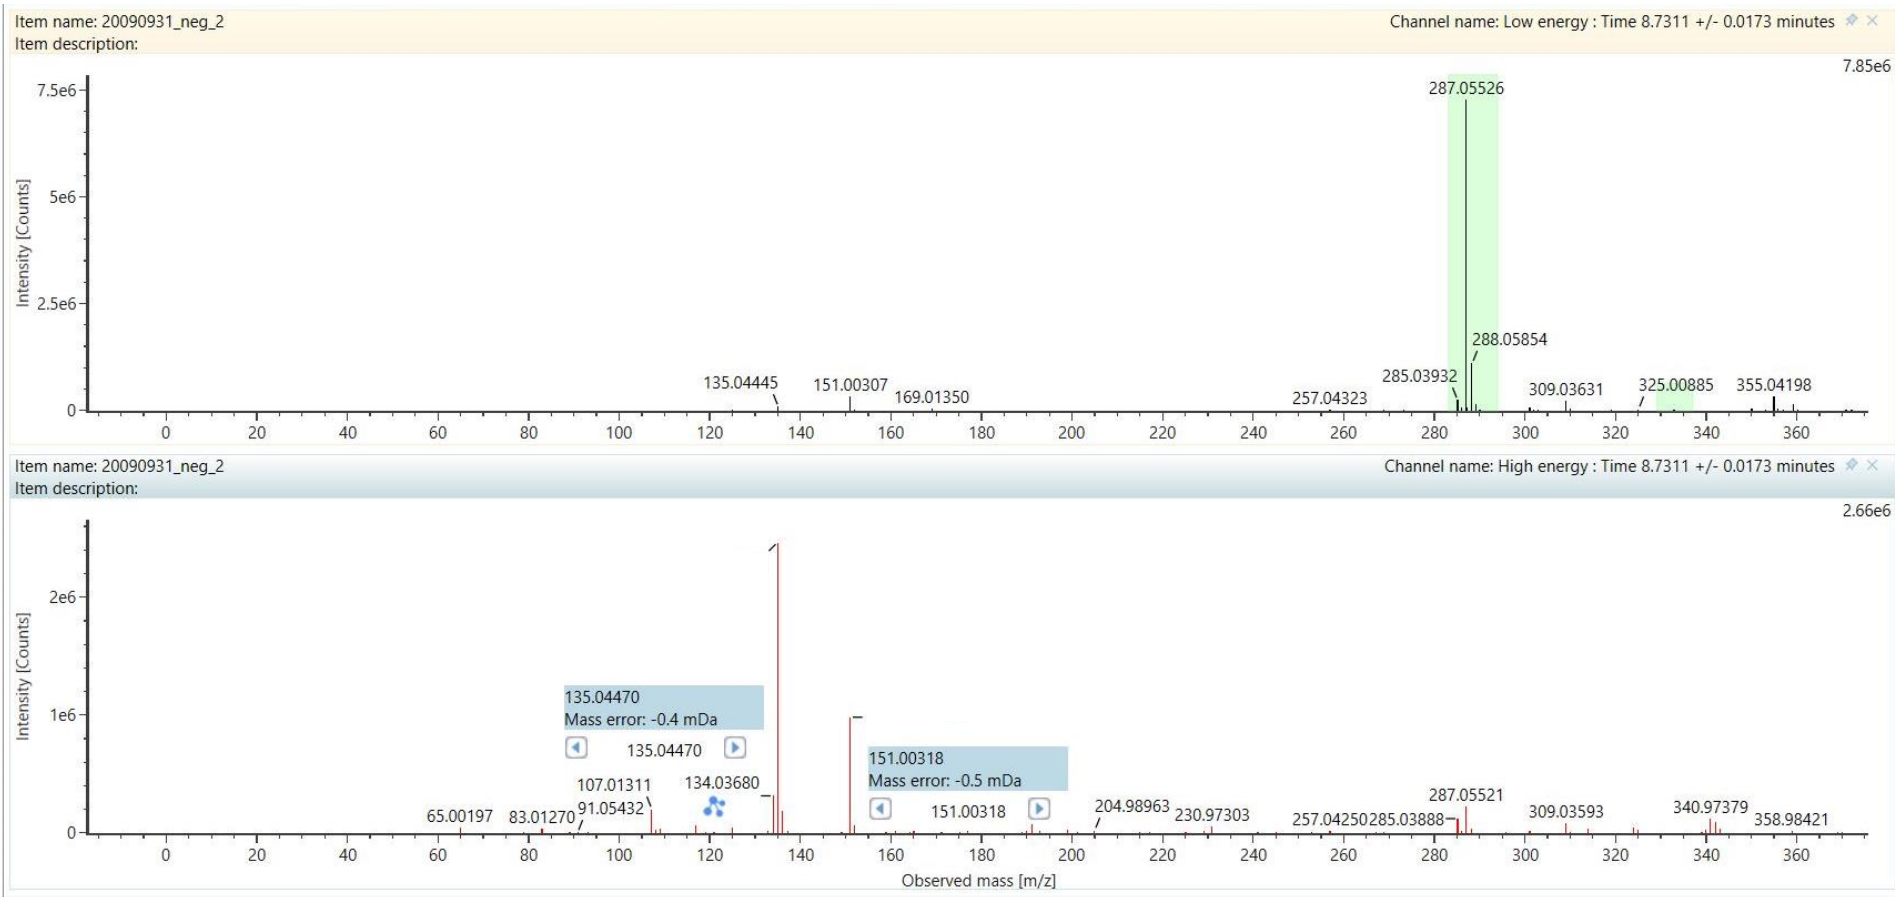



**Figure S36.** ESI-QToF-MS spectrum of kaempferide (peak 35)

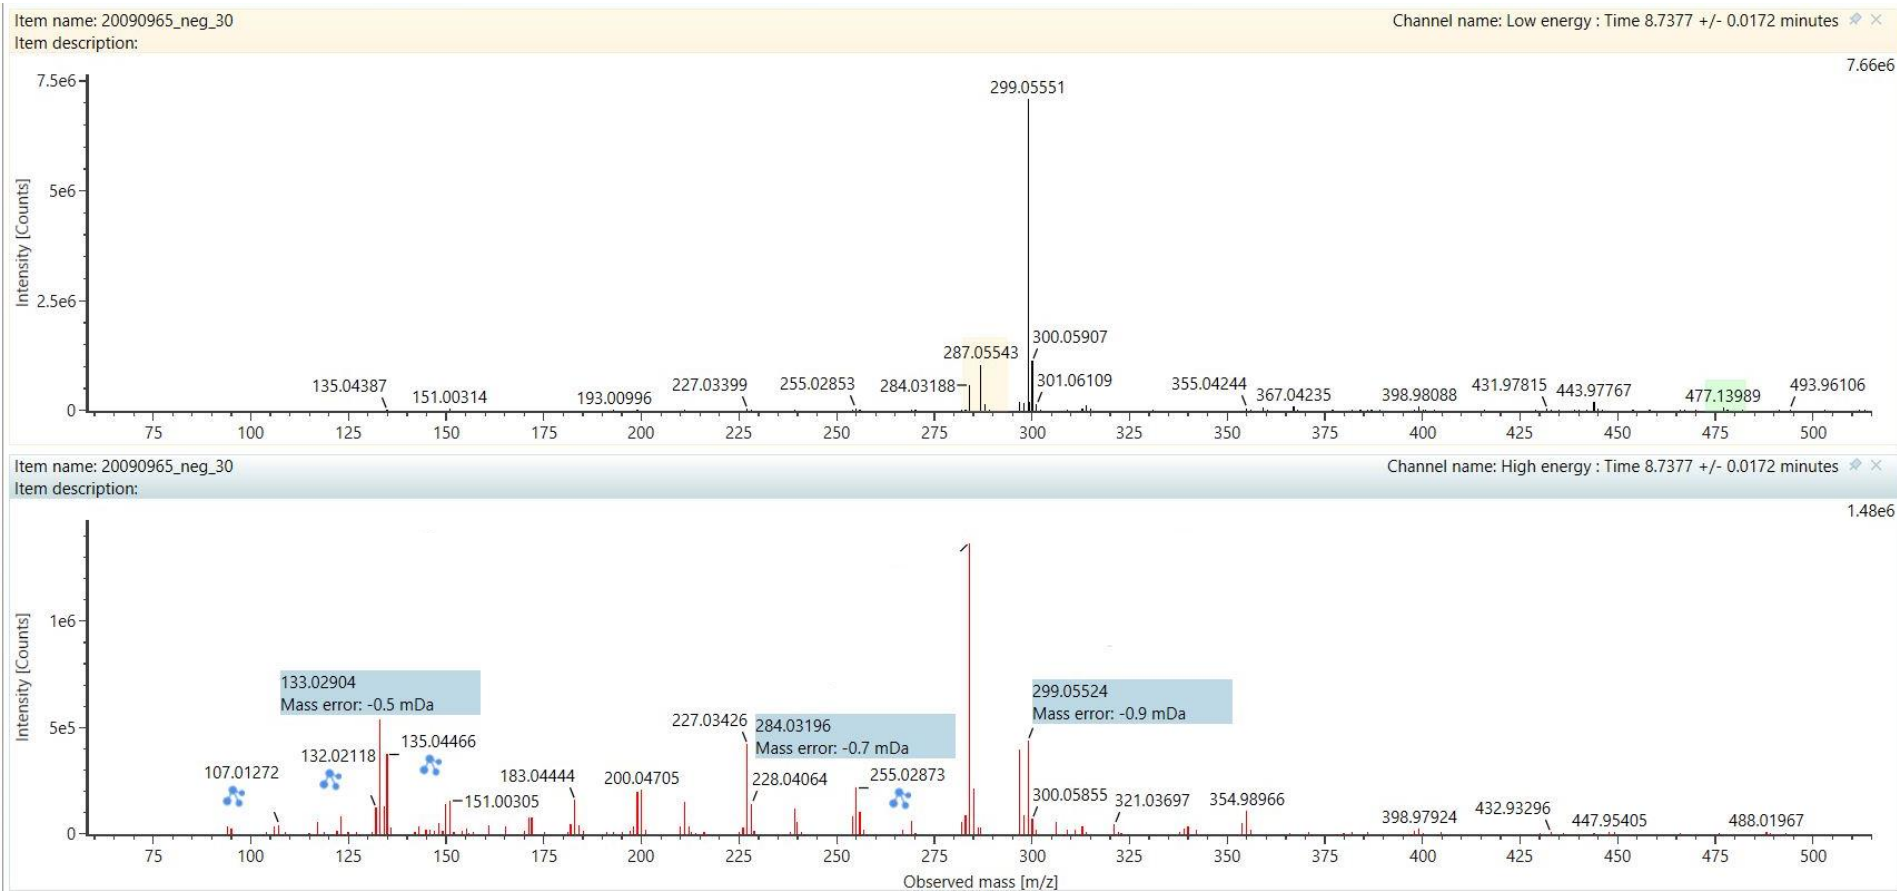

**Figure S37.** ESI-QToF-MS spectrum of luteolin (peak 36)

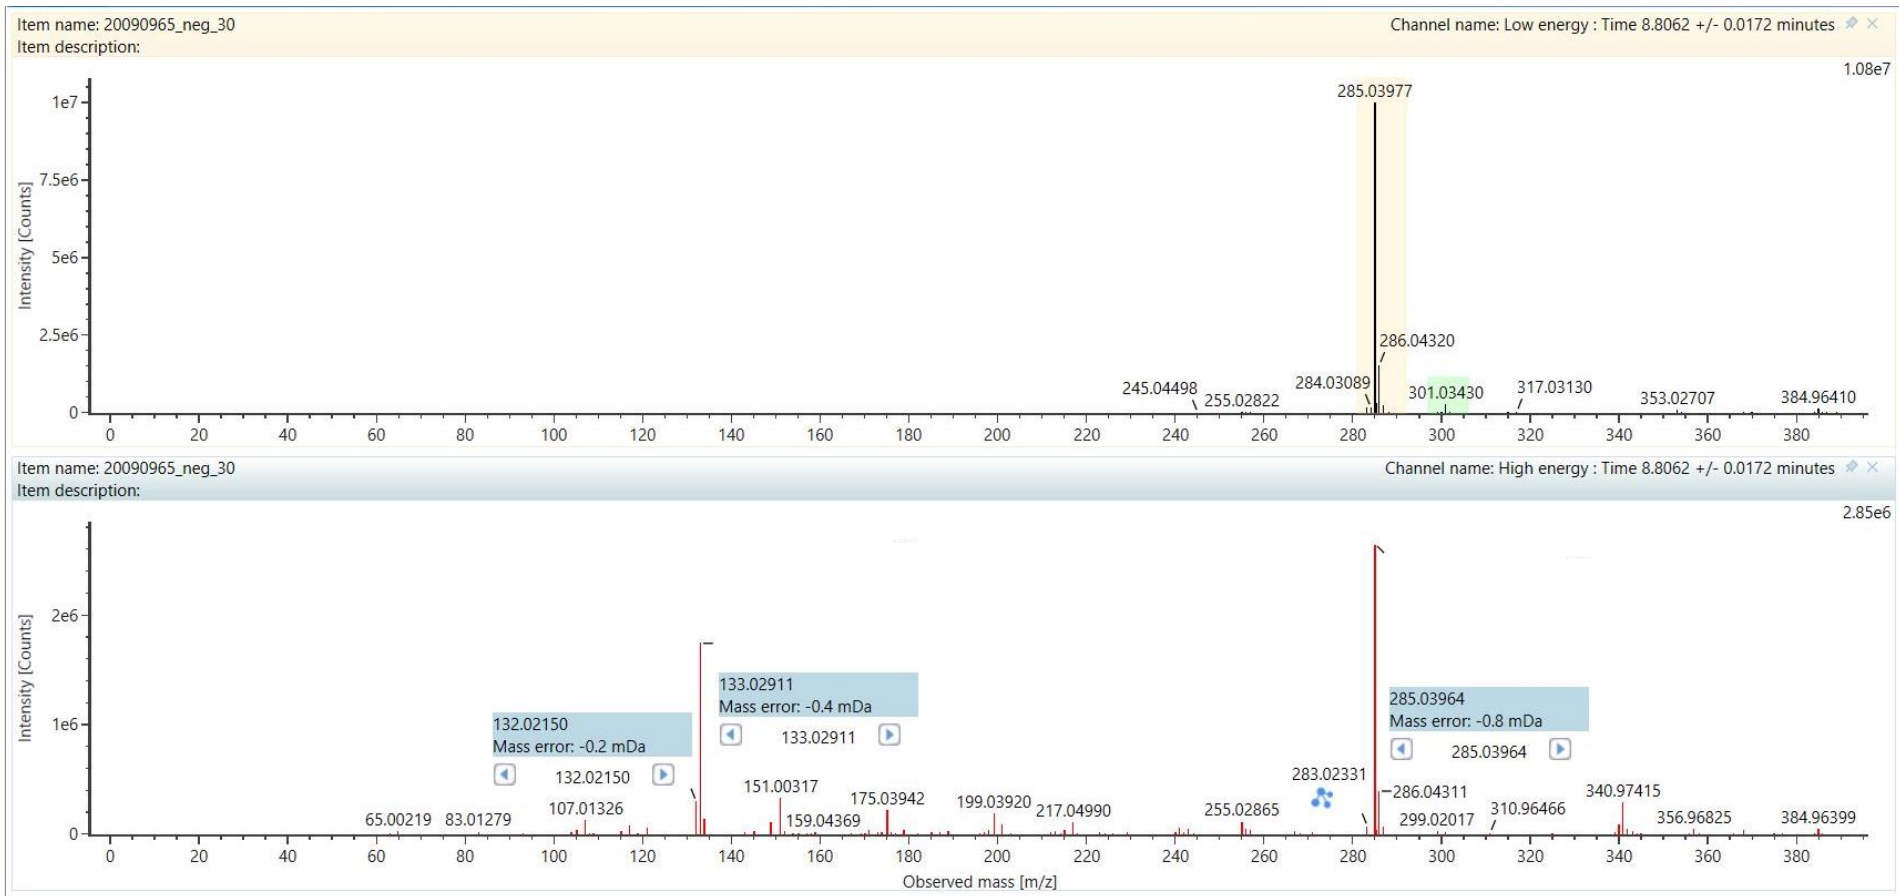

**Figure S38.** ESI-QToF-MS spectrum of 4-methoxylanceoletin-4'-O-glucoside (peak 37)

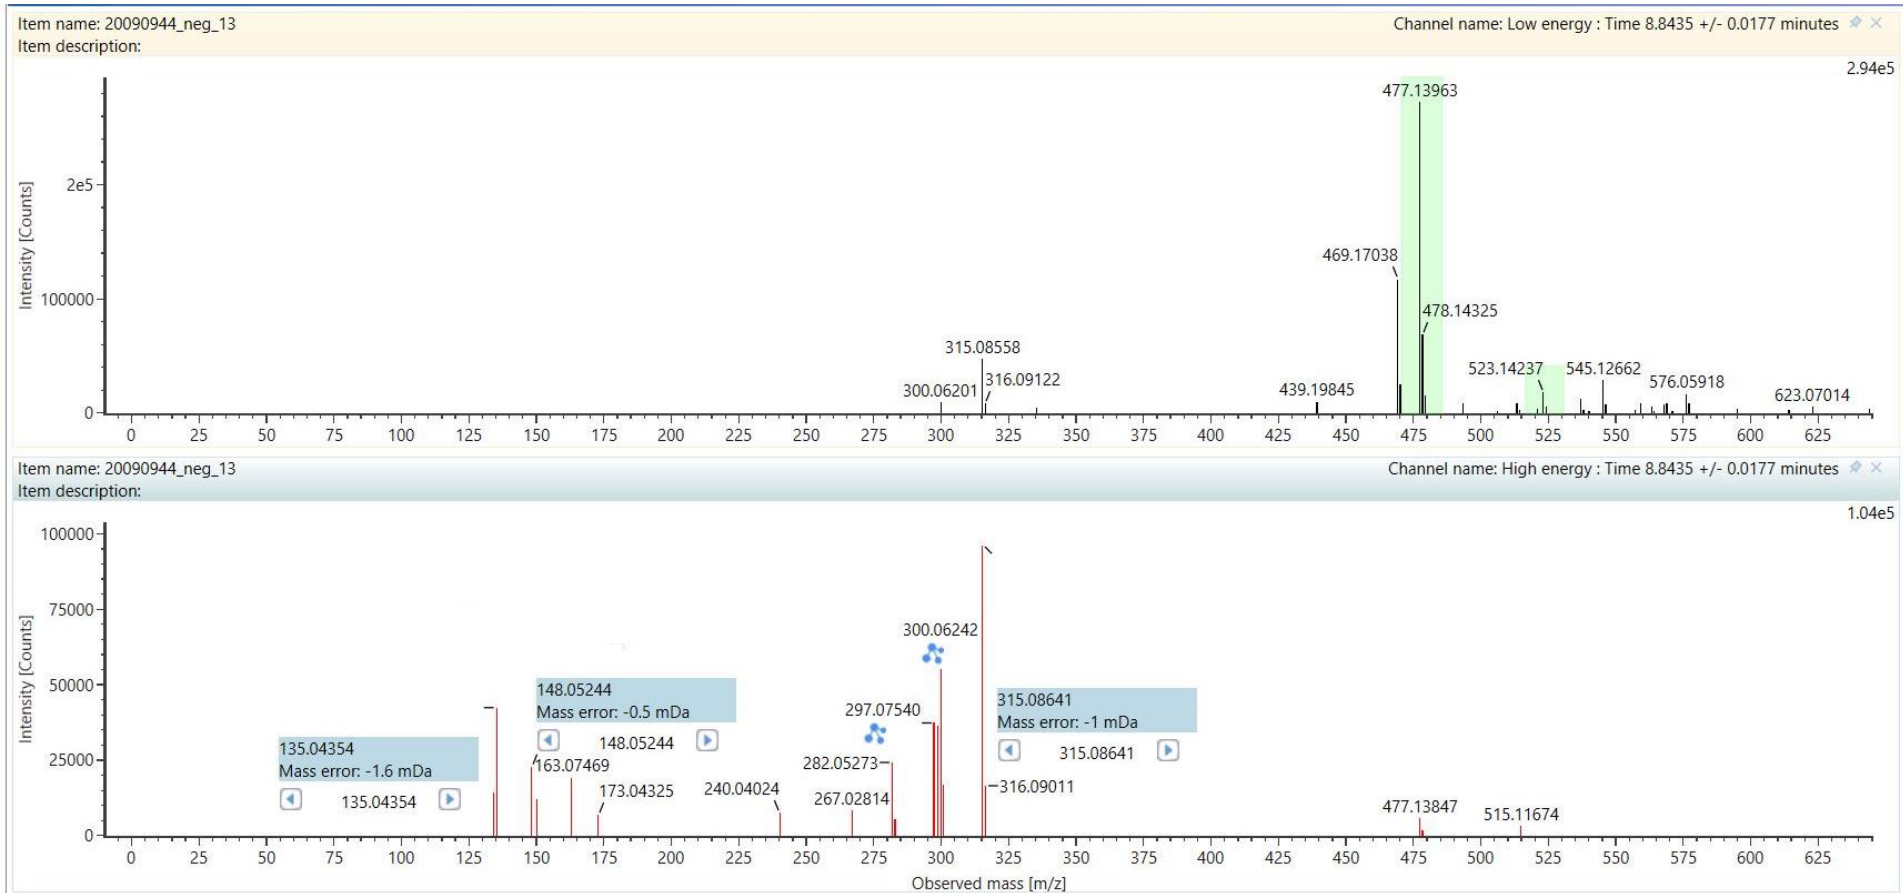

**Figure S39.** ESI-QToF-MS spectrum of butein (peak 38)

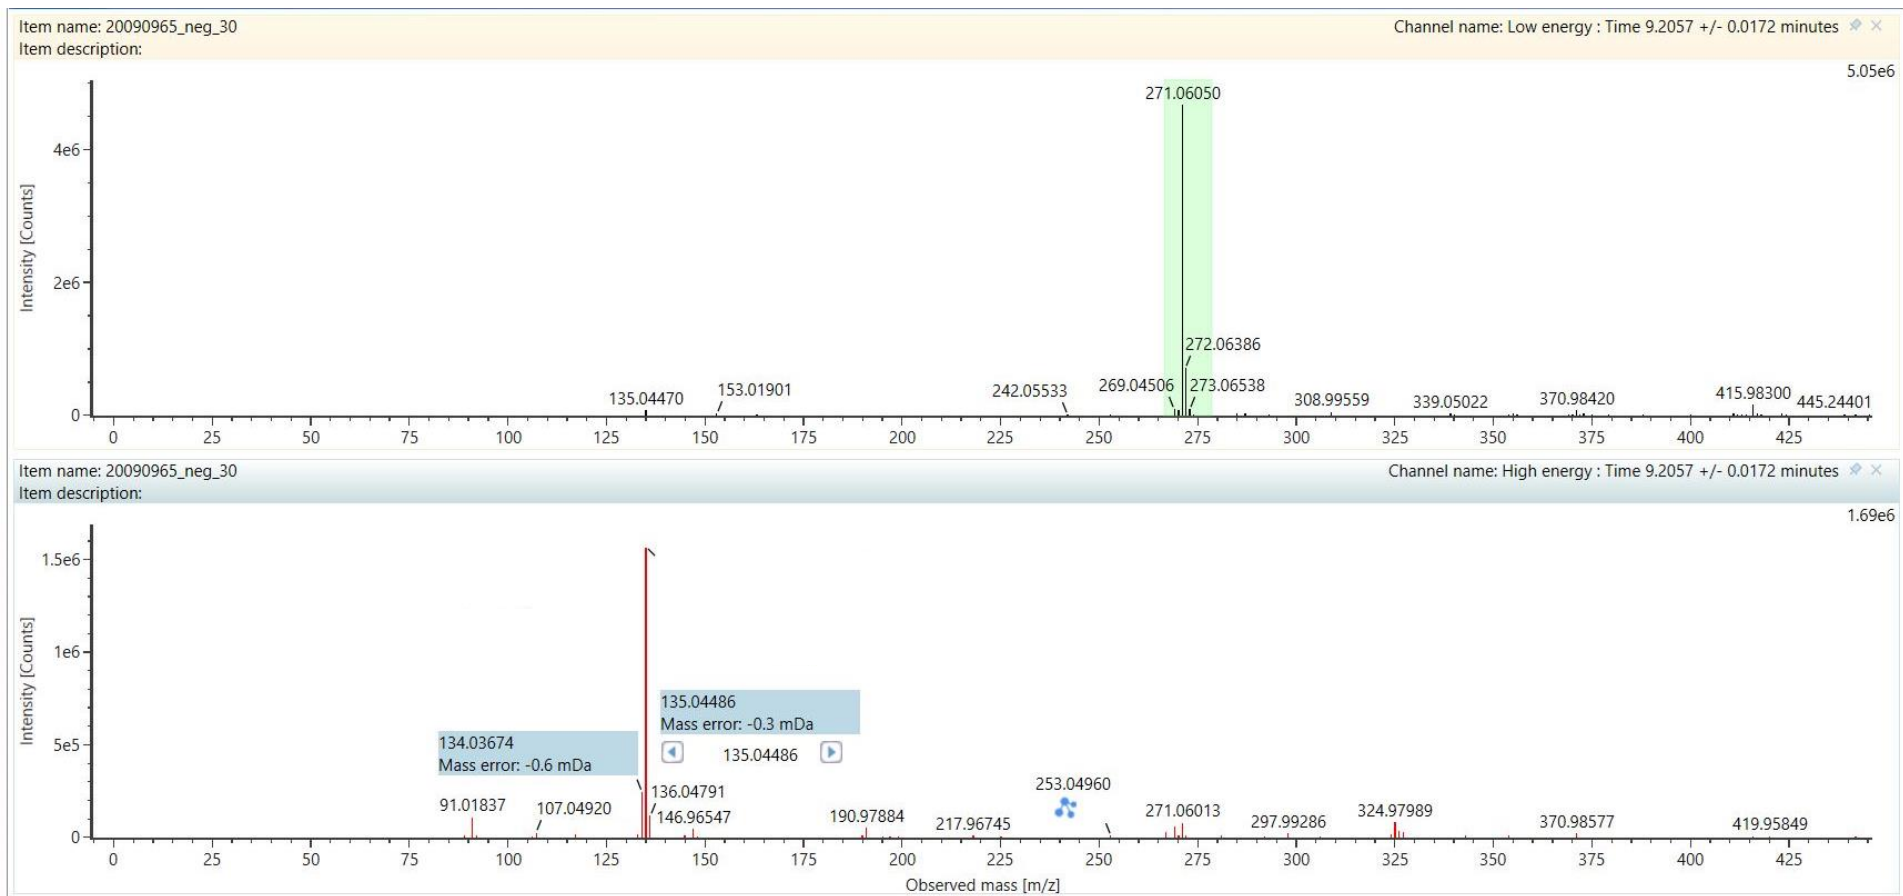

**Figure S40.** ESI-QToF-MS spectrum of apigenin (peak 39)

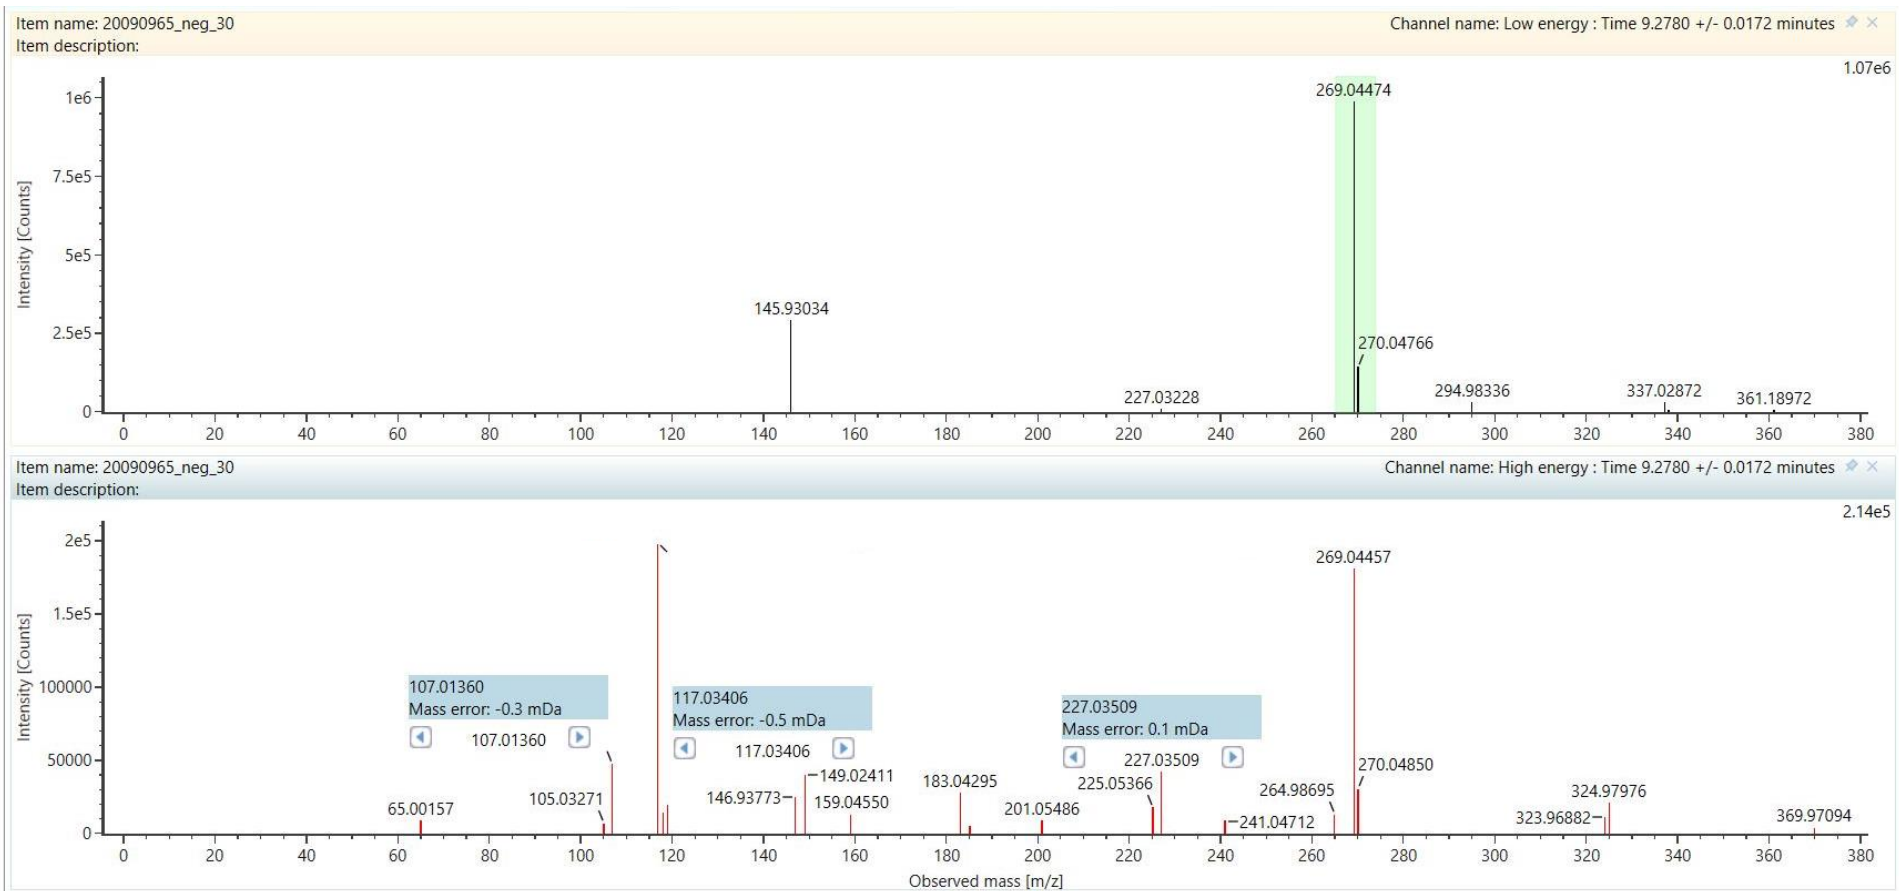

**Figure S41.** ESI-QToF-MS spectrum of unknown (peak 40)

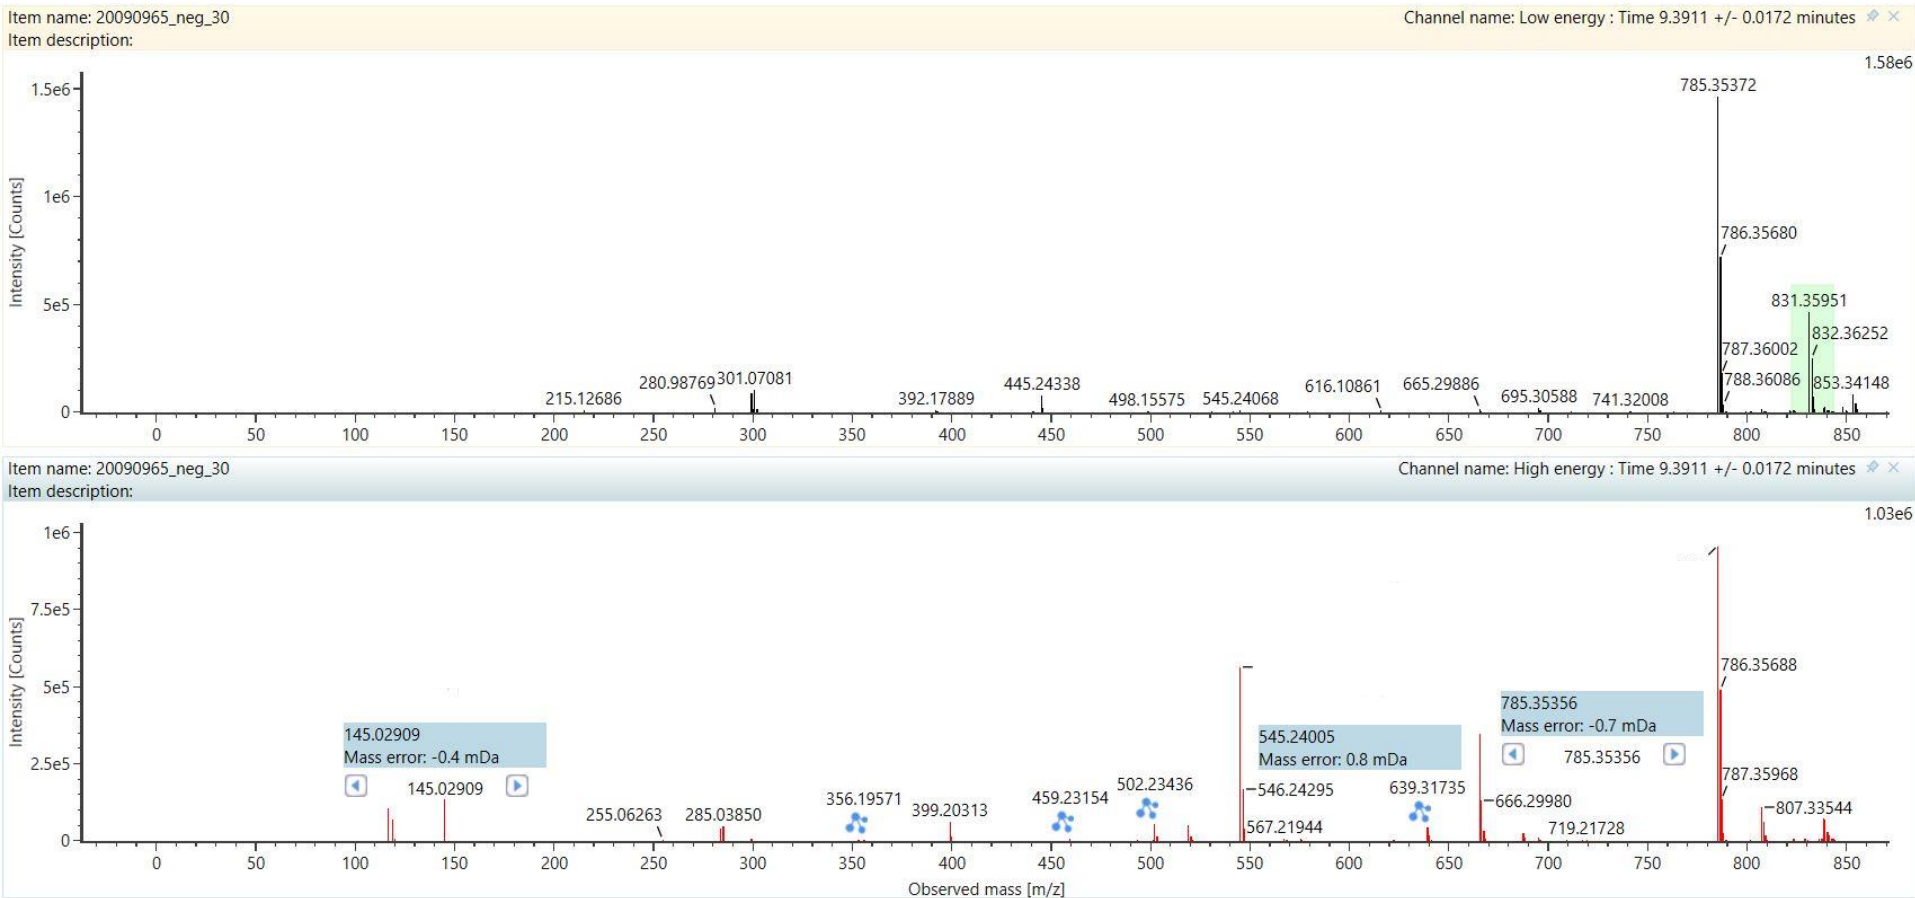

**Figure S42.** ESI-QToF-MS spectrum of lobetyolinin (peak 41)

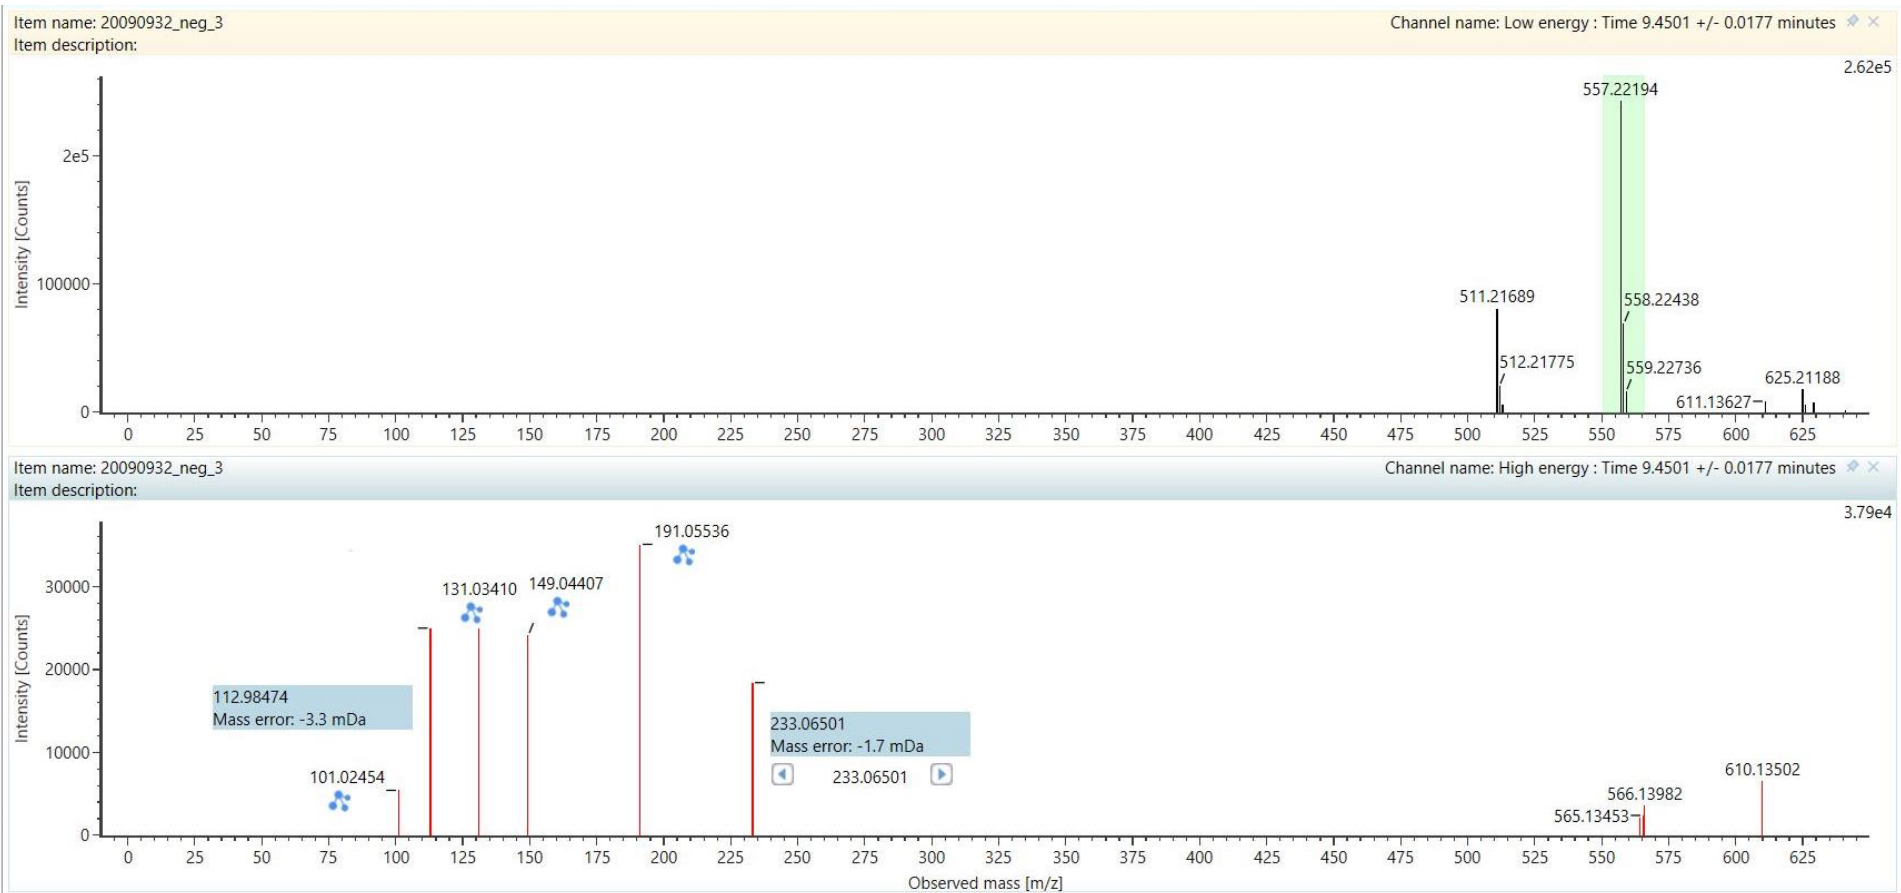

**Figure S43.** Validation plot of the OPLS-DA obtained from 200 permutation test.

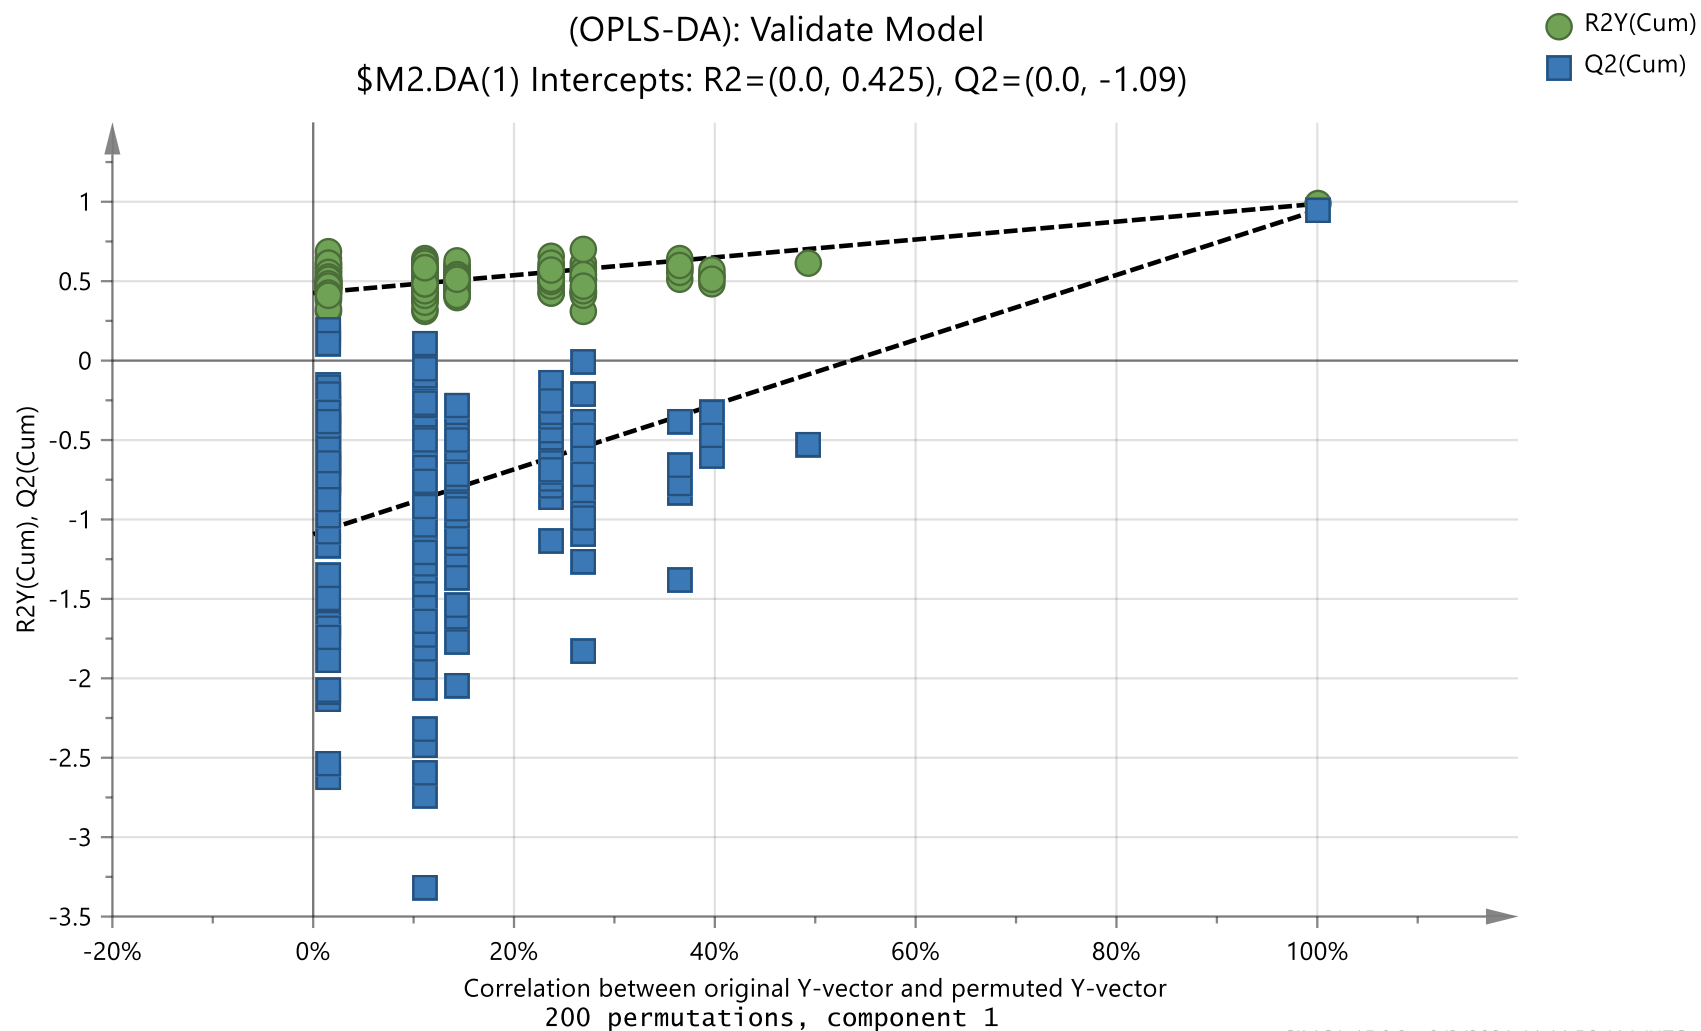

Supplement: s1 [file s1]
